# Supplementary material for: Synthesis of sulfinamides via photocatalytic alkylation or arylation of sulfinylamine
Source: Royal Society of Chemistry journal article supplement (doi:10.1039/d3ob01782f), 2023-12-07

## Supporting information

### Synthesis of Sulfinamides via Photocatalytic Alkylation or Arylation of Sulfinylamine

Ming Yan,<sup>a,b</sup> Si-fan Wang,<sup>a,b</sup> Yong-po Zhang,<sup>\*,a</sup> Jin-zhong Zhao,<sup>\*,a</sup> Zhuo Tang<sup>b</sup> and  
Guang-xun Li,<sup>\*,b</sup>

<sup>a</sup>Department of Basic Sciences, Shanxi Agricultural University, Taigu, Shanxi, 030800,  
China. E-mail: zhangyp@sxau.edu.cn; zhaojz@sxau.edu.cn

<sup>b</sup>Natural Products Research Center, Chengdu Institution of Biology, Chinese Academy  
of Science, Chengdu, Sichuan, 610041, China. Email: [ligx@cib.ac.cn](mailto:ligx@cib.ac.cn)

#### Table of contents

|                                                                   |    |
|-------------------------------------------------------------------|----|
| 1. General experimental procedures.....                           | 2  |
| 2. Preparation of starting materials .....                        | 3  |
| 3. Screening the reaction conditions .....                        | 4  |
| 4. General procedure for the preparation of products .....        | 6  |
| 4.1 General procedure for the preparation of products 3-43 .....  | 6  |
| 4.2 Gram-scale synthesis.....                                     | 7  |
| 4.3 General procedure for the preparation of products 44-48. .... | 7  |
| 5. Mechanistic Investigations.....                                | 10 |
| 5.1 Control experiments .....                                     | 10 |
| 5.2 TEMPO trapping experiment .....                               | 10 |
| 5.3 Investigation of the N-H bond via NMR experiments .....       | 11 |
| 5.4 UV-VIS spectroelectrochemistry experiments.....               | 11 |
| 5.5 Stern-Volmer quenching experiments.....                       | 11 |
| 5.6 Cyclic voltammetry spectra of representative substrates ..... | 15 |
| 6. Characterization of products .....                             | 16 |
| 7. NMR Spectra .....                                              | 30 |

## 1. General experimental procedures

Unless otherwise stated, all reagents were purchased from commercial suppliers and used without further purification. All solvents employed in the reactions were distilled from appropriate drying agent prior to use. All reactions that required anhydrous or airless conditions were carried by standard procedures under an argon atmosphere. Organic solutions were concentrated under reduced pressure on a Büchi rotary evaporator. Reactions were monitored by thin-layer chromatography using 0.25 mm Merck silica gel precoated plates (60F-254). Visualization was accomplished by irradiation with UV light at 254 nm. Flash column chromatography was performed using Merck silica gel 60 (particle size 0.040–0.063 mm). Chemical yields refer to pure isolated substances.

NMR spectra were recorded at 25 °C on Bruker spectrometers at 400 MHz (<sup>1</sup>H NMR), 101 MHz (<sup>13</sup>C NMR) and 376 MHz (<sup>19</sup>F NMR) respectively, using CDCl<sub>3</sub> or DMSO-d<sub>6</sub> as the solvent and TMS as the internal reference. Spectra were reported as follows: chemical shift (δ ppm), multiplicity (s = singlet, d = doublet, t = triplet, q = quartet, m = multiplet, br = broad), coupling constants (Hz), integration and assignment. Mass spectra were recorded on a Waters Vion IMS QToF system equipped with an ESI source.

## 2. Preparation of starting materials

### (1) Potassium trifluoro(organo)borates are commercially available.

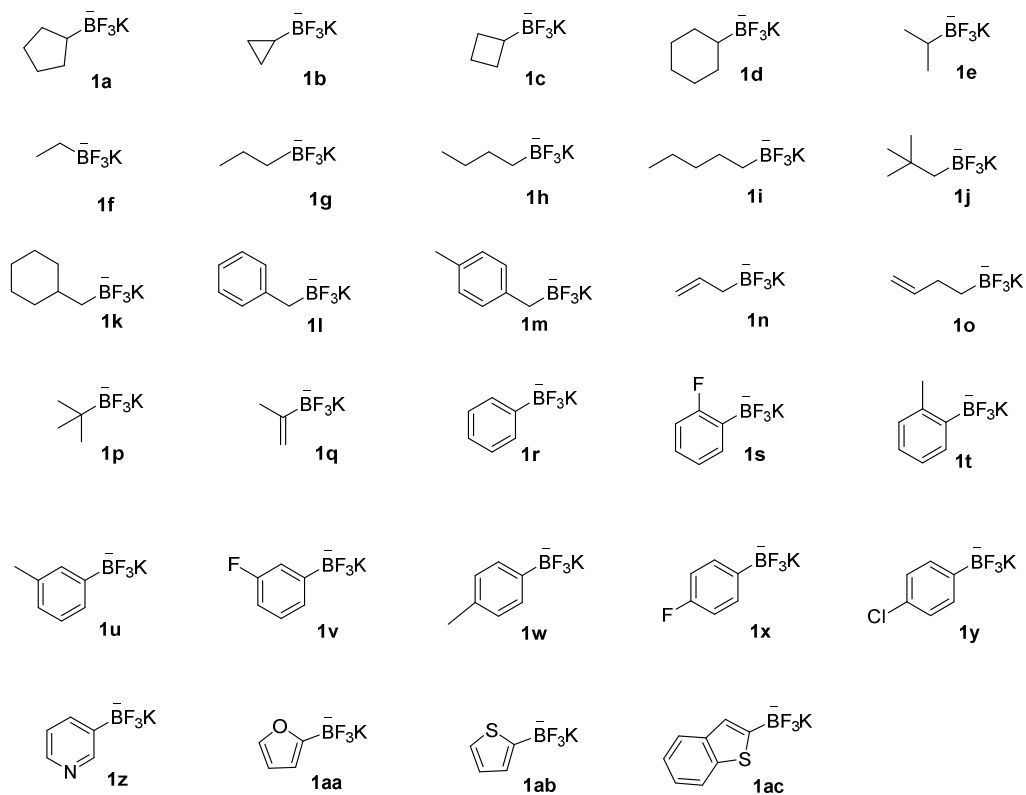

**Figure S1** Potassium trifluoro(organo)borates used in this experiment

### (2) Synthesis of *N*-thionylaniline with the corresponding aniline.

*N*-thionylanilines were prepared according to the previous literature.<sup>1-5</sup> The spectral data were consistent with previously reported data.

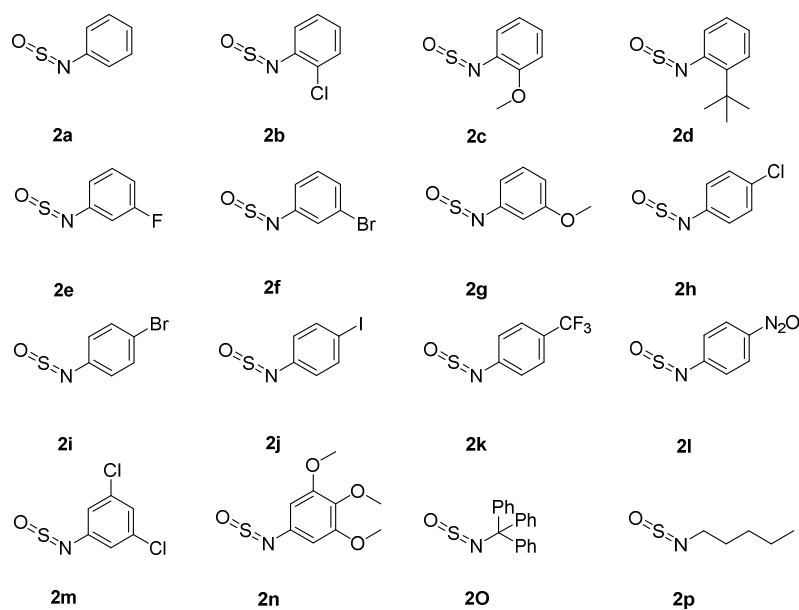

**Figure S2** *N*-thionylaniline used in this experiment

### 3. Screening the reaction conditions

**Table S1** Optimization of the reaction conditions<sup>a</sup>

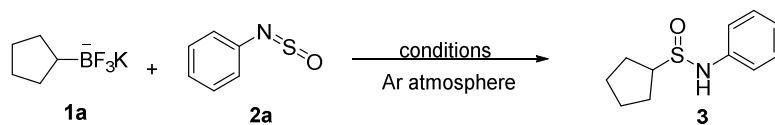

| Entry           | PC  | Solvent           | Temp(°C) | Yield <sup>b</sup> |
|-----------------|-----|-------------------|----------|--------------------|
| 1               | I   | DCE <sup>c</sup>  | RT       | 62                 |
| 2               | II  | DCE               | RT       | <5                 |
| 3               | III | DCE               | RT       | 85                 |
| 4               | IV  | DCE               | RT       | 51                 |
| 5               | V   | DCE               | RT       | 60                 |
| 6               | VI  | DCE               | RT       | 23                 |
| 7               | VII | DCE               | RT       | 10                 |
| 8               | III | CHCl <sub>3</sub> | RT       | 66                 |
| 9               | III | DCM               | RT       | 80                 |
| 10              | III | 1,4-dioxane       | RT       | 63                 |
| 11              | III | DMF               | RT       | 60                 |
| 12              | III | EA                | RT       | 64                 |
| 13              | III | MeCN              | RT       | 67                 |
| 14              | III | Acetone           | RT       | 63                 |
| 15              | III | TMF               | RT       | 67                 |
| 16              | III | DCE               | 40       | 83                 |
| 17              | III | DCE               | 20       | 66                 |
| 18              | III | DCE               | 0        | 53                 |
| 19 <sup>d</sup> | III | DCE               | RT       | 85                 |

|                 |     |     |    |    |
|-----------------|-----|-----|----|----|
| 20 <sup>e</sup> | III | DCE | RT | 61 |
| 21 <sup>f</sup> | III | DCE | RT | 67 |
| 22 <sup>g</sup> | III | DCE | RT | 41 |

<sup>a</sup>**1a** (0.2 mmol), **2a** (0.2 mmol), photocatalyst (0.002 mmol, 1 mol%) in solvent (2mL, 0.1 M) under white LED (12 W) irradiation for 12 h. <sup>b</sup>Isolated yield, <sup>c</sup>DCE= 1,2-Dichloroethane, <sup>d</sup>under white LED (24 W) irradiation, <sup>e</sup>under green LED, <sup>f</sup>irradiation for 6 h. <sup>g</sup>under air.

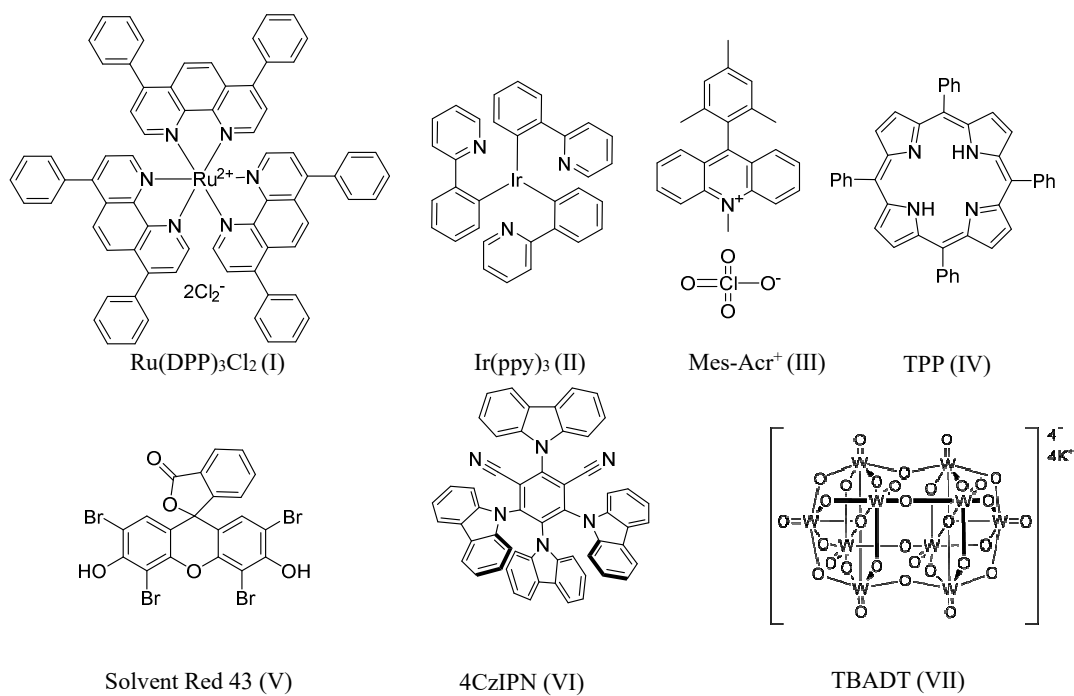

**Figure S3** Structure of PC

## 4. General procedure for the preparation of products

### 4.1 General procedure for the preparation of products 3-43

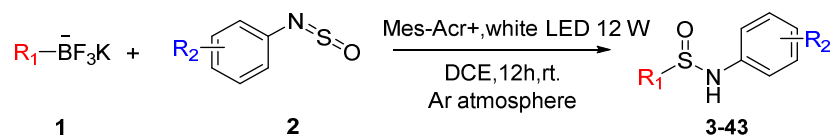

General procedure for products **3-43**: A test tube equipped with a magnetic stirrer was charged with potassium trifluoro(organo)borates **1** (0.2 mmol, 1 equiv.) and *N*-thionylaniline (0.2 mmol, 1 equiv.) followed by addition of Mes-Acr<sup>+</sup> (0.002 mmol, 0.01 equiv.) and 1,2-dichloroethane (2 mL) under air, the tube was sealed and three vacuum/argon cycles were made. The mixture was then irradiated by a 12 W white LED tube and stirred at room temperature for 12 hours. Upon completion, the reaction mixture was concentrated under a vacuum and the residue was purified by column chromatography (petrol ether/EtOAc = 5:1) to give the desired products **3-43**.

We use LED tube (12 W white LED, the wavelength is 400-760 nm), which are manufactured by Guangdong Shenzhen Liangxi Optoelectronics Co. Ltd (see Figure S4). The irradiation vessel is an ordinary glass test tube. The distance from the light source to the irradiation vessel is about 5.0 cm. No filter between LED and test tube is used. The reaction vessel is cooled by using a small fan.

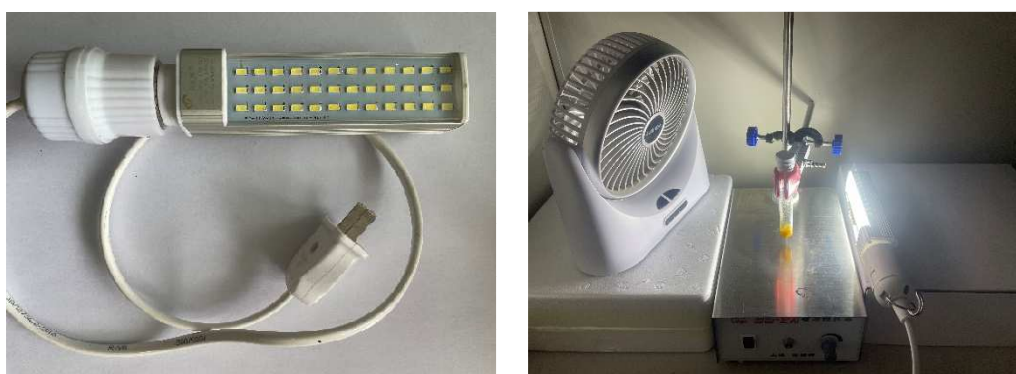

Figure S4 Reaction setup

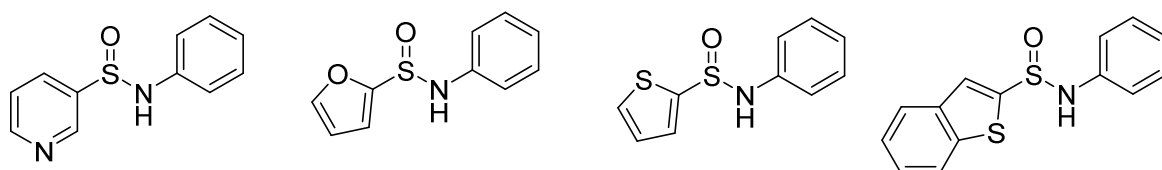

Figure S5 Unsuccessful examples under the standard reaction conditions

## 4.2 Gram-scale synthesis

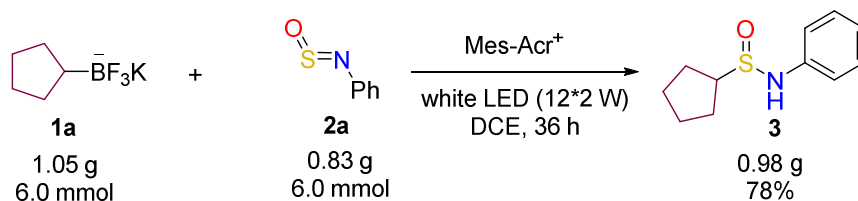

Potassium cyclopentyltrifluoroborate (1.05g, 6.0mmol, 1.0 equiv.), *N*-thionylaniline (0.83 g, 6.0 mmol, 1.0 equiv.) were placed in a dry 100 mL Round-bottomed flask, followed by addition of Mes-Acr<sup>+</sup> (24.65 mg, 0.06 mmol, 0.01 equiv.) and 1,2-dichloroethane (20 mL) under air. The flask was sealed and three vacuum/argon cycles were made. The reaction mixture was irradiated with 24 W (2 x 12 W) white LEDs at room temperature under Ar atmosphere for 36 h. After the completion of the reaction, the reaction mixture was taken out, filtered the resulting suspension and washed the precipitate with dichloromethane, the filtrate was collected and concentrated under reduced pressure, and the residue was purified by flash column chromatography (petroleum ether/EtOAc =10/1 to 5/1) afforded product.

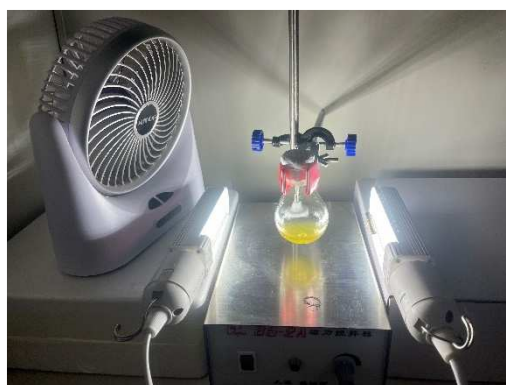

Figure S6 Reaction setup

## 4.3 General procedure for the preparation of products 44-48.

General procedure for products 44-46:

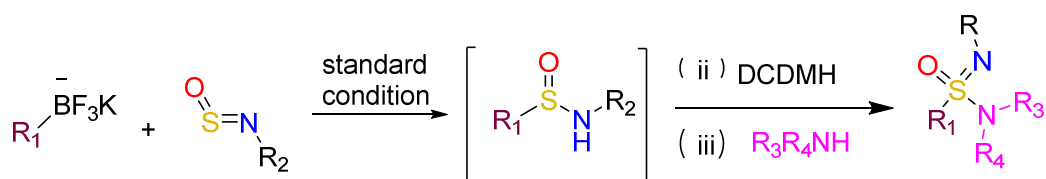

A test tube equipped with a magnetic stirrer was charged with potassium trifluoro(organo)borates **1** (0.2mmol, 1.0 equiv.) and *N*-thionylaniline **2** (0.2 mmol, 1.0 equiv.) followed by the addition of Mes-Acr<sup>+</sup>(0.002 mmol, 0.01 equiv.) and 1,2-dichloroethane (2 mL) under air, the tube was sealed and three vacuum/argon cycles were made. The mixture was then irradiated by a 12 W white LED strip and stirred at room temperature for 12 hours. Upon completion, the reaction mixture was directly carried out to the next step without separation and purification. After the reaction mixture was placed at -20°C and stirred for 5 minutes, DCDMH (0.2 mmol, 1.0 equiv.) was directly added, and stirring was continued for 2 hours. The amines (0.4 mmol, 2.0 equiv.) were then added and stirring was continued at -20 °C for 10 hours. After the completion of the reaction, the reaction mixture was taken out, returned to room temperature, filtered the resulting suspension and washed the precipitate with dichloromethane, the filtrate was collected and concentrated under reduced pressure, and the residue was purified by flash column chromatography (petroleum ether/EtOAc =25/1 to 8/1) afforded products **44-46**.

#### General procedure for product **47**

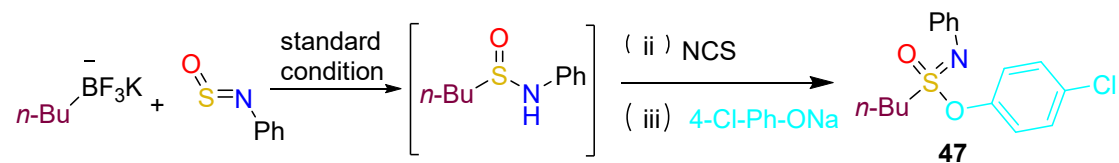

A test tube equipped with a magnetic stirrer was charged with potassium trifluoro(organo)borates **1** (0.2 mmol, 1.0 equiv.) and *N*-Thionylaniline **2** (0.2 mmol, 1.0 equiv.) followed by the addition of Mes-Acr<sup>+</sup> (0.002 mmol, 0.01 equiv.) and 1,2-dichloroethane (2 mL) under air, the tube was sealed and three vacuum/argon cycles were made. The mixture was then irradiated by a 12 W white LED strip and stirred at room temperature for 12 hours. Upon completion, the reaction mixture was directly carried out to the next step without separation and purification. After the reaction mixture was placed at -20°C and stirred for 5 minutes, NCS (0.3 mmol, 1.5 equiv.) was directly added, and stirring was continued for 2 hours. The sodium 4-chlorophenolate (0.6 mmol, 3.0 equiv.) was then added and stirring was continued at -20 °C for 10 hours. After the completion of the reaction, the reaction mixture was taken out, returned to



room temperature, filtered the resulting suspension and washed the precipitate with dichloromethane, the filtrate was collected and concentrated under reduced pressure, and the residue was purified by flash column chromatography (petroleum ether/EtOAc = 15/1 to 10/1) afforded product **47**.

**General procedure for the preparation of product 48.**

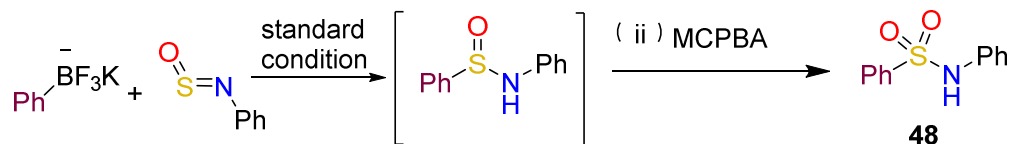

A test tube equipped with a magnetic stirrer was charged with potassium trifluoro(organo)borates **1** (0.2mmol, 1.0 equiv.) and N-Thionylaniline **2** (0.2 mmol, 1.0 equiv.) followed by the addition of Mes-Acr<sup>+</sup>(0.002 mmol, 0.01 equiv.) and 1, 2-dichloroethane (2 mL) under air, the tube was sealed and three vacuum/argon cycles were made. The mixture was then irradiated by a 12 W white LED strip and stirred at room temperature for 12 hours. MCPBA (0.3 mmol, 1.5 equiv.) was added, and stirring was continued for 10 minutes. After the completion of the reaction, the reaction mixture was taken out, filtered the resulting suspension and washed the precipitate with dichloromethane, the filtrate was collected and concentrated under reduced pressure, and the residue was purified by flash column chromatography (petroleum ether/EtOAc =10/1 to 5/1) afforded product **48**.

## 5. Mechanistic Investigations

### 5.1 Control experiments

To explore the reaction mechanism, some control experiments were first carried out (Table S2). The reaction did not proceed without white LED irradiation (entry 2). This result indicates that the reaction is not a simple polar reaction. In addition, almost no reaction occurred in the absence of the photocatalyst Mes-Acr<sup>+</sup> (entry 3), These facts suggest that the Mes-Acr<sup>+</sup> is the active species that absorbs white light for excitation. The results demonstrated that light, and photocatalyst, none of these can be excluded. The absence of anyone leads to the complete inhibition of this process.

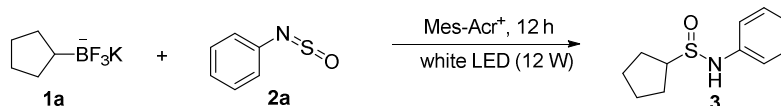

Table S2 Control experiments

| Entry | Deviation from the standard conditions | Yield (%) |
|-------|----------------------------------------|-----------|
| 1     | None                                   | 85        |
| 2     | No light                               | trace     |
| 3     | No Mes-Acr <sup>+</sup>                | trace     |

### 5.2 TEMPO trapping experiment

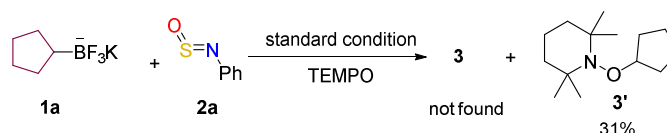

In the dark, a test tube equipped with a magnetic stirrer was charged with potassium cyclopentyltrifluoroborate **1a** (0.2 mmol), *N*-thionylaniline **2a** (0.2 mmol) and TEMPO (1.0 mmol, 5.0 equiv.) followed by addition of Mes-Acr<sup>+</sup> (0.002 mmol, 0.01 equiv.) and 1,2-dichloroethane (2 mL) under air, the tube was sealed and three vacuum/argon cycles were made. The mixture was then irradiated by a 12 W white LED strip and stirred at room temperature for 12 hours. Upon completion, the reaction mixture was concentrated under vacuum and the residue was purified by column chromatography (petrol ether/EtOAc = 30:1) to give the desired product **3'** (14.0 mg, yield: 31%). **3** was not found. This proves the generation of alkyl radical.

### 5.3 Investigation of the N-H bond via NMR experiments

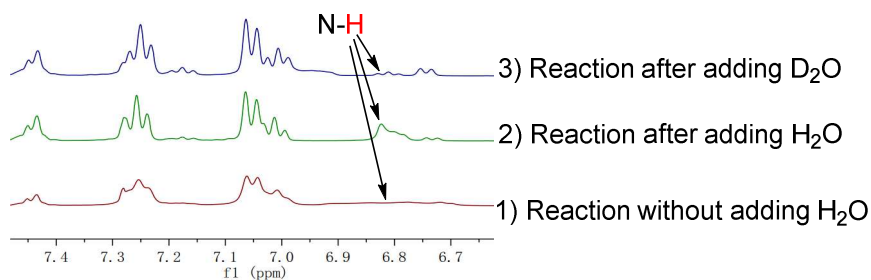

Figure S7 NMR experiment

### 5.4 UV-VIS spectroelectrochemistry experiments

The UV-vis experiments were performed on varioskans flash full wavelength scanning multi-function reader with a quartz cuvette (10 mm path length). According to figure S4, [Mes-Acr<sup>+</sup>]<sup>+</sup>ClO<sub>4</sub><sup>-</sup> has absorption at 362 nm and 424 nm regions.

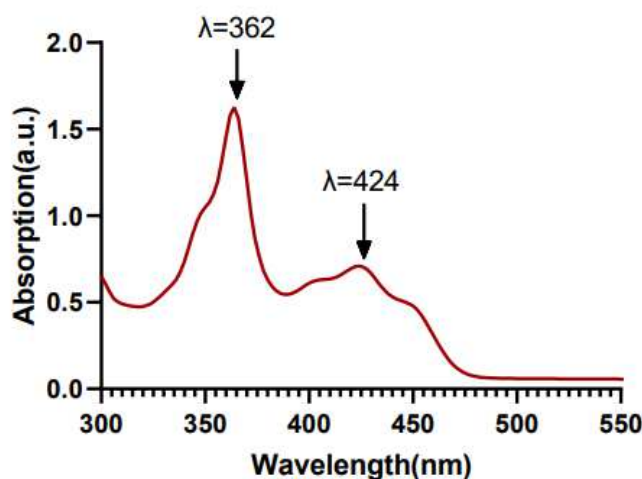

Figure S8 UV-Vis spectra of [Mes-Acr<sup>+</sup>]<sup>+</sup>ClO<sub>4</sub><sup>-</sup> (0.1  $\mu$ mol/mL) in 1,2-dichloroethane

### 5.5 Stern-Volmer quenching experiments

Stern-Volmer quenching experiments were conducted on an F97Pro Fluorescence Spectrophotometer. Stern-Volmer luminescence quenching experiments were run with freshly prepared solutions of [Mes-Acr<sup>+</sup>]<sup>+</sup>ClO<sub>4</sub><sup>-</sup> ( $1.0 \times 10^{-4}$  M) and quencher ( $2.5 \times 10^{-3}$  M) in 1,2-Dichloroethane at room temperature. After degassing with argon for 5 min, the emission spectra of the samples were collected. In our experiments, white light is used to excite the reaction, and white light is a mixed light in the wavelength range of 400 nm to 760 nm, and the UV-Vis spectral data of [Mes-Acr<sup>+</sup>]<sup>+</sup>ClO<sub>4</sub><sup>-</sup> shows that it absorbs at both 362 nm and 424 nm. Therefore, in the fluorescence quenching experiments, we chose 362 nm and 424 nm as the excitation wavelengths, respectively.

The preparation method of the sample solution is shown in Table S3. Other parameters are set as: wavelength scan range: 440 nm to 750 nm; scan speed: 1000 nm/min; scan interval: 1 nm; excitation bandwidth: 10 nm; transmit bandwidth: 10 nm.

**Table S3.** Sample solution preparation methods

| Entry | Concentration of 1a (or 2a) (M) | Volume of Mes-Acr <sup>+</sup> | Volume of 1a (or 2a) | Volume of additional DCE | total volume |
|-------|---------------------------------|--------------------------------|----------------------|--------------------------|--------------|
| 1     | 0                               | 500ul                          | 0μL                  | 2500ul                   | 3000μL       |
| 2     | 0.83x10 <sup>-4</sup>           | 500ul                          | 100μl                | 2400ul                   | 3000μL       |
| 3     | 1.67x10 <sup>-4</sup>           | 500ul                          | 200μl                | 2300 ul                  | 3000μL       |
| 4     | 2.50x10 <sup>-4</sup>           | 500ul                          | 300μl                | 2200 ul                  | 3000μL       |
| 5     | 3.33x10 <sup>-4</sup>           | 500ul                          | 400μl                | 2100 ul                  | 3000μL       |
| 6     | 4.17x10 <sup>-4</sup>           | 500ul                          | 500μl                | 2000 ul                  | 3000μL       |
| 7     | 4.99x10 <sup>-4</sup>           | 500ul                          | 600μl                | 1900 ul                  | 3000μL       |
| 8     | 5.83x10 <sup>-4</sup>           | 500ul                          | 700μl                | 1800 ul                  | 3000μL       |
| 9     | 6.67x10 <sup>-4</sup>           | 500ul                          | 800μl                | 1700 ul                  | 3000μL       |
| 10    | 7.50x10 <sup>-4</sup>           | 500ul                          | 900μl                | 1600 ul                  | 3000μL       |

#### Chose 362 nm as the excitation wavelengths

First, the emission spectrum of [Mes-Acr<sup>+</sup>]ClO<sub>4</sub><sup>-</sup> under excitation at 362 nm was tested. We investigated the effect of adding different concentrations of 1a or 2a on the emission spectrum of [Mes-Acr<sup>+</sup>]ClO<sub>4</sub><sup>-</sup> (Table S4 and Figure S9, Table S5 and Figure S10), Where I<sub>0</sub> being the luminescence intensity in the absence of any quencher, I being the luminescence intensity in the presence of a predefined quencher concentration.

**Table S4.** Stern-Vollmer quenching experiment of Mes-Acr<sup>+</sup> with 1a in 1,2-dichloroethane.<sup>a</sup>

| Concentration of 1a (M) | I <sub>0</sub> | I    | I <sub>0</sub> /I |
|-------------------------|----------------|------|-------------------|
| 0                       | 1284           | 1284 | 1.00              |
| 0.83x10 <sup>-4</sup>   | 1284           | 1264 | 1.02              |
| 1.67x10 <sup>-4</sup>   | 1284           | 1279 | 1.00              |
| 2.50x10 <sup>-4</sup>   | 1284           | 1341 | 0.96              |
| 3.33x10 <sup>-4</sup>   | 1284           | 1370 | 0.94              |
| 4.17x10 <sup>-4</sup>   | 1284           | 1302 | 0.99              |
| 4.99 × 10 <sup>-4</sup> | 1284           | 1281 | 1.00              |
| 5.83 × 10 <sup>-4</sup> | 1284           | 1327 | 0.97              |
| 6.67 × 10 <sup>-4</sup> | 1284           | 1317 | 0.97              |
| 7.50 × 10 <sup>-4</sup> | 1284           | 1400 | 0.92              |

<sup>a</sup>(1×10<sup>-4</sup> M Mes-Acr<sup>+</sup>, 1,2-dichloroethane, 25 °C, λ<sub>ex</sub> = 362 nm)

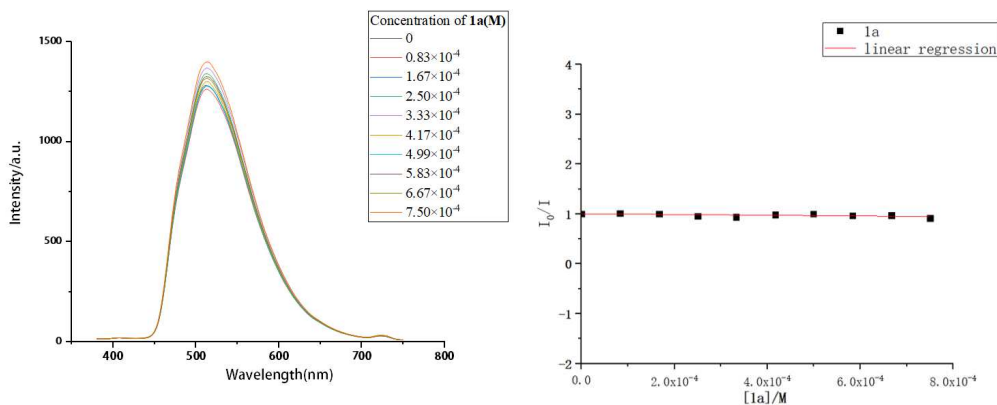

**Figure S9.** Stern-Vollmer quenching experiment of Mes-Acr<sup>+</sup> with **1a** in 1,2-dichloroethane. (1.0×10<sup>-4</sup> M Mes-Acr<sup>+</sup>, 1,2-dichloroethane, 25 °C, λ<sub>ex</sub> = 362 nm)

**Table S5.** Stern-Vollmer quenching experiment of Mes-Acr<sup>+</sup> with **2a** in 1,2-Dichloroethane. <sup>a</sup>

| Concentration of <b>2a</b> (M) | I <sub>0</sub> | I    | I <sub>0</sub> /I |
|--------------------------------|----------------|------|-------------------|
| 0                              | 1284           | 1284 | 1.00              |
| 0.83 × 10 <sup>-4</sup>        | 1284           | 1029 | 1.24              |
| 1.67 × 10 <sup>-4</sup>        | 1284           | 847  | 1.51              |
| 2.50 × 10 <sup>-4</sup>        | 1284           | 680  | 1.88              |
| 3.33 × 10 <sup>-4</sup>        | 1284           | 483  | 2.65              |
| 4.17 × 10 <sup>-4</sup>        | 1284           | 369  | 3.47              |
| 4.99 × 10 <sup>-4</sup>        | 1284           | 294  | 4.36              |
| 5.83 × 10 <sup>-4</sup>        | 1284           | 239  | 5.37              |
| 6.67 × 10 <sup>-4</sup>        | 1284           | 187  | 6.86              |
| 7.50 × 10 <sup>-4</sup>        | 1284           | 156  | 8.23              |

<sup>a</sup>(1×10<sup>-4</sup> M Mes-Acr<sup>+</sup>, 1,2-dichloroethane, 25°C, λ<sub>ex</sub> = 362 nm)

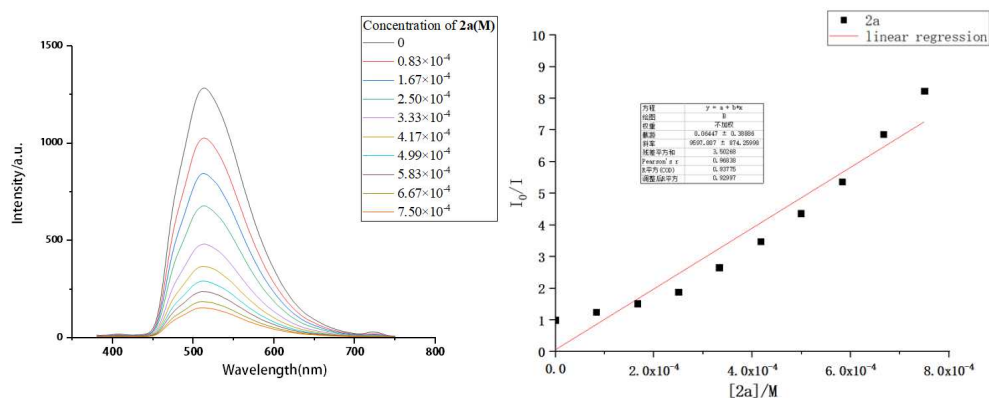

**Figure S10.** Stern-Vollmer quenching experiment of Mes-Acr<sup>+</sup> with **2a** in 1,2-dichloroethane. (1.0×10<sup>-4</sup> M Mes-Acr<sup>+</sup>, 1,2-dichloroethane, 25 °C, λ<sub>ex</sub> = 362 nm)

#### Chose 424 nm as the excitation wavelengths

Subsequently, the emission spectrum of Mes-Acr<sup>+</sup> under excitation at 424 nm was tested. We investigated the effect of adding different concentrations of **1a** or **2a** on the emission spectrum of Mes-Acr<sup>+</sup> (Table S6 and Figure S11, Table S7 and Figure S12), Where I<sub>0</sub> being the luminescence intensity in the absence of any quencher, I being the luminescence intensity in the presence of a predefined quencher concentration.

**Table S6.** Stern-Vollmer quenching experiment of Mes-Acr<sup>+</sup> with **1a** in 1,2-dichloroethane<sup>a</sup>.

| Concentration of <b>1a</b> (M) | I <sub>0</sub> | I   | I <sub>0</sub> /I |
|--------------------------------|----------------|-----|-------------------|
| 0                              | 876            | 876 | 1.00              |
| 0.83 × 10 <sup>-4</sup>        | 876            | 870 | 1.00              |
| 1.67 × 10 <sup>-4</sup>        | 876            | 882 | 0.99              |
| 2.50 × 10 <sup>-4</sup>        | 876            | 915 | 0.95              |
| 3.33 × 10 <sup>-4</sup>        | 876            | 949 | 0.92              |
| 4.17 × 10 <sup>-4</sup>        | 876            | 888 | 0.98              |
| 4.99 × 10 <sup>-4</sup>        | 876            | 879 | 0.99              |
| 5.83 × 10 <sup>-4</sup>        | 876            | 917 | 0.95              |
| 6.67 × 10 <sup>-4</sup>        | 876            | 894 | 0.97              |
| 7.50 × 10 <sup>-4</sup>        | 876            | 969 | 0.90              |

<sup>a</sup>(1.0 × 10<sup>-4</sup> M Mes-Acr<sup>+</sup>, 1,2-dichloroethane, 25 °C, λ<sub>ex</sub> = 424 nm)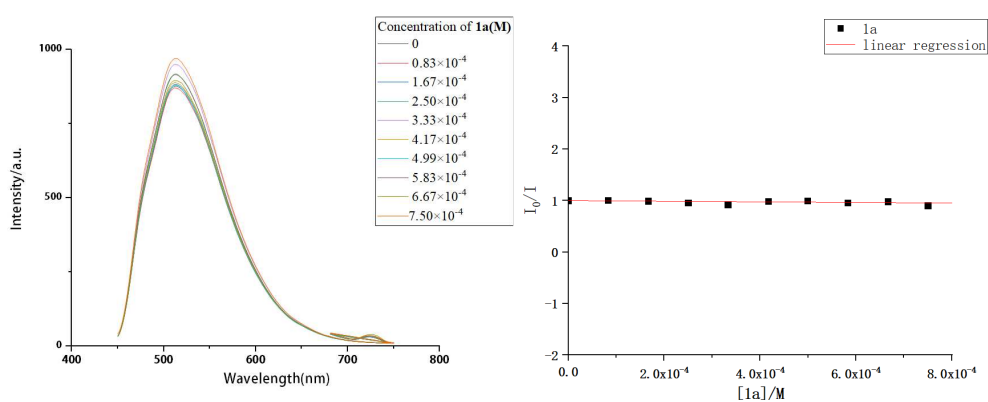**Figure S11.** Stern-Vollmer quenching experiment of Mes-Acr<sup>+</sup> with **1a** in 1,2-dichloroethane. (1.0 × 10<sup>-4</sup> M Mes-Acr<sup>+</sup>, 1,2-dichloroethane, 25 °C, λ<sub>ex</sub> = 424 nm)**Table S7.** Stern-Vollmer quenching experiment of Mes-Acr<sup>+</sup> with **2a** in 1,2-Dichloroethane<sup>a</sup>

| Concentration of <b>2a</b> (M) | I <sub>0</sub> | I    | I <sub>0</sub> /I |
|--------------------------------|----------------|------|-------------------|
| 0                              | 1005           | 1005 | 1.00              |
| 0.83 × 10 <sup>-4</sup>        | 1005           | 904  | 1.11              |
| 1.67 × 10 <sup>-4</sup>        | 1005           | 935  | 1.07              |
| 2.50 × 10 <sup>-4</sup>        | 1005           | 938  | 1.07              |
| 3.33 × 10 <sup>-4</sup>        | 1005           | 919  | 1.09              |
| 4.17 × 10 <sup>-4</sup>        | 1005           | 916  | 1.09              |
| 4.99 × 10 <sup>-4</sup>        | 1005           | 889  | 1.13              |
| 5.83 × 10 <sup>-4</sup>        | 1005           | 900  | 1.12              |
| 6.67 × 10 <sup>-4</sup>        | 1005           | 897  | 1.12              |
| 7.50 × 10 <sup>-4</sup>        | 1005           | 925  | 1.09              |

<sup>a</sup>(1.0 × 10<sup>-4</sup> M Mes-Acr<sup>+</sup>, 1,2-dichloroethane, 25 °C, λ<sub>ex</sub> = 424 nm)

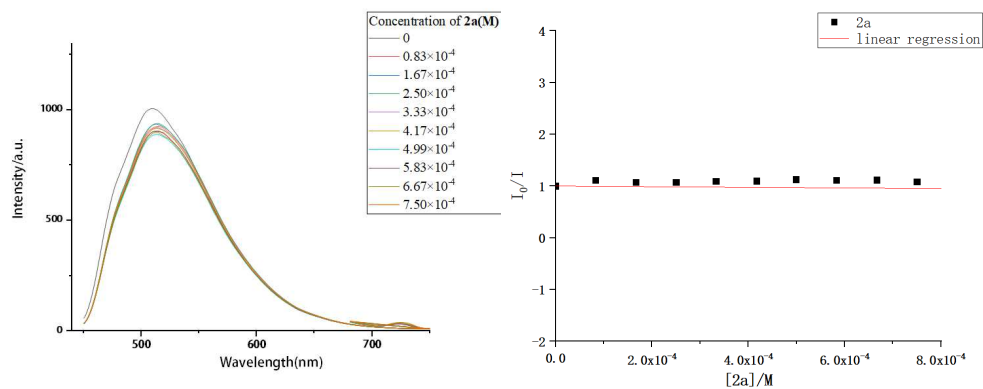

**Figure S12.** Stern-Vollmer quenching experiment of Mes-Acr<sup>+</sup> with 2a in 1,2-dichloroethane. (1.0 × 10<sup>-4</sup> M Mes-Acr<sup>+</sup>, 1,2-Dichloroethane, 25 °C,  $\lambda_{\text{exc}}$  = 424 nm)

## 5.6 Cyclic voltammetry spectra of representative substrates

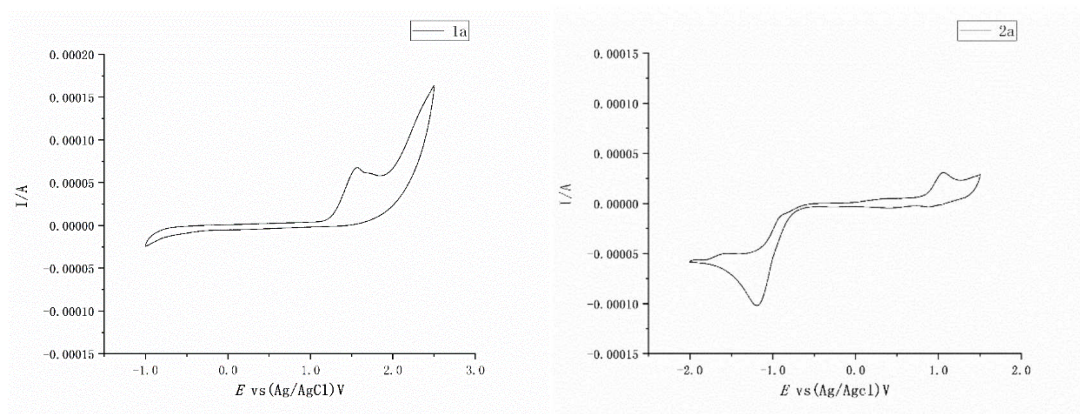

**Figure S13** Cyclic voltammetry spectrum of 1a and 2a

## 6. Characterization of products

### *N*-phenylcyclopentanesulfinamide (3)

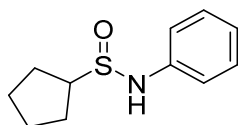

Yellow oil (35.5 mg, yield:85%).

**<sup>1</sup>H NMR** (400 MHz, CDCl<sub>3</sub>) δ 7.31 – 7.19 (m, 2H), 7.07 – 6.95 (m, 3H), 6.90 (s, 1H), 3.48 – 3.40 (m, 1H), 2.22 – 2.05 (m, 1H), 2.02 – 1.84 (m, 2H), 1.84 – 1.51 (m, 5H).

**<sup>13</sup>C NMR** (101 MHz, CDCl<sub>3</sub>) δ 141.8, 129.4, 122.7, 118.0, 64.1, 27.5, 27.1, 25.9, 25.8.

**HRMS** (ESI) *m/z*: [M+Na]<sup>+</sup> Calcd for C<sub>11</sub>H<sub>15</sub>NOSNa<sup>+</sup>: 232.0772; found: 232.0776.

### *N*-phenylcyclopropanesulfinamide (4)

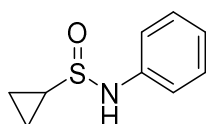

White solid (27.1 mg, yield: 75%), M.p.85-87°C.

**<sup>1</sup>H NMR** (400 MHz, CDCl<sub>3</sub>) δ 7.33 – 7.24 (m, 2H), 7.10 – 6.98(m, 3H), 6.04 (s, 1H), 2.46 – 2.29 (m, 1H), 1.40 – 1.32 (m, 1H), 0.99 – 0.83 (m, 3H).

**<sup>13</sup>C NMR** (101 MHz, CDCl<sub>3</sub>) δ 140.9, 129.5, 123.3, 118.5, 31.1, 3.5, -1.1.

**HRMS** (ESI) *m/z*: [M+Na]<sup>+</sup> Calcd for C<sub>9</sub>H<sub>11</sub>NOSNa<sup>+</sup>: 204.0459; found: 204.0462.

### *N*-phenylcyclobutanesulfinamide (5)

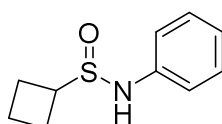

Yellow oil (26.9 mg, yield: 69%).

**<sup>1</sup>H NMR** (400 MHz, CDCl<sub>3</sub>) δ 7.21 (t, *J* = 7.70 Hz, 2H), 7.15 (s, 1H), 7.04 (d, *J* = 7.90 Hz, 2H), 6.97 (t, *J* = 7.46 Hz, 1H), 3.84 – 3.68 (m, 1H), 2.66 – 2.45 (m, 1H), 2.30 – 2.11(m, 3H), 1.96 (t, *J* = 8.29 Hz, 2H).

**<sup>13</sup>C NMR** (101 MHz, CDCl<sub>3</sub>) δ 141.8, 129.3, 122.6, 117.9, 56.3, 22.9, 21.9, 17.5.

**HRMS** (ESI) *m/z*: [M+Na]<sup>+</sup> Calcd for C<sub>10</sub>H<sub>13</sub>NOSNa<sup>+</sup>: 218.0616; found: 218.0618.

### *N*-phenylcyclohexanesulfinamide (6)

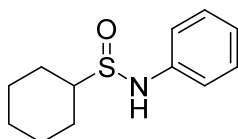

Yellow solid (34.8 mg, yield:78%), M.p.100-102°C.



**<sup>1</sup>H NMR** (400 MHz, CDCl<sub>3</sub>) δ 7.20 (t, *J* = 7.69 Hz, 2H), 7.11 (s, 1H), 7.04 – 6.89 (m, 3H), 3.04 – 2.86 (m, 1H), 2.14 (d, *J* = 13.26 Hz, 1H), 2.07 – 1.94 (m, 1H), 1.93 – 1.75 (m, 2H), 1.66 (s, 1H), 1.53 – 1.20 (m, 5H).

**<sup>13</sup>C NMR** (101 MHz, CDCl<sub>3</sub>) δ 142.0, 129.3, 122.6, 117.9, 62.7, 26.6, 26.3, 25.5, 25.1, 25.0.

**HRMS** (ESI) *m/z*: [M+H]<sup>+</sup> Calcd for C<sub>12</sub>H<sub>18</sub>NOS<sup>+</sup>: 224.1109; found: 224.1102.

***N*-phenylpropane-2-sulfinamide (7)**

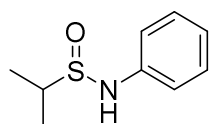

Yellow solid (28.5 mg, yield: 78%), M.p.68-70°C.

**<sup>1</sup>H NMR** (400 MHz, CDCl<sub>3</sub>) δ 7.25 – 7.17 (m, 2H), 7.06 – 6.95 (m, 3H), 6.93 (s, 1H), 3.07 (p, *J* = 6.87 Hz, 1H), 1.31 (dd, *J* = 17.51, 6.91 Hz, 6H).

**<sup>13</sup>C NMR** (101 MHz, CDCl<sub>3</sub>) δ 141.9, 129.4, 122.7, 118.0, 54.5, 16.1, 15.7.

**HRMS** (ESI) *m/z*: [M+Na]<sup>+</sup> Calcd for C<sub>9</sub>H<sub>13</sub>NOSNa<sup>+</sup>: 206.0616; found: 206.0612.

***N*-phenylethanesulfinamide (8)**

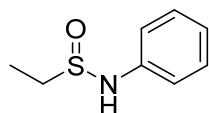

Yellow oil (24.7 mg, yield: 77%).

**<sup>1</sup>H NMR** (400 MHz, CDCl<sub>3</sub>) δ 7.24 (t, *J* = 7.49 Hz, 2H), 7.10 – 6.99 (m, 3H), 6.92 (s, 1H), 3.10 – 2.94(m, 2H), 1.33 (t, *J* = 7.44 Hz, 3H).

**<sup>13</sup>C NMR** (101 MHz, CDCl<sub>3</sub>) δ 141.3, 129.4, 123.1, 118.4, 49.6, 7.6.

**HRMS** (ESI) *m/z*: [M+H]<sup>+</sup> Calcd for C<sub>8</sub>H<sub>12</sub>NOS<sup>+</sup>:170.0640; found: 170.0643.

***N*-phenylpropane-1-sulfinamide (9)**

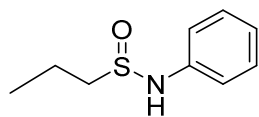

Yellow oil (25.6 mg, yield: 70%).

**<sup>1</sup>H NMR** (400 MHz, CDCl<sub>3</sub>) δ 7.28 (d, *J* = 2.10 Hz, 1H), 7.24 (d, *J* = 1.92 Hz, 1H), 7.10 – 6.99(m, 4H), 3.02 – 2.93(m, 2H), 1.77 (q, *J* = 7.51 Hz, 2H), 1.05 (t, *J* = 7.43 Hz, 3H).

**<sup>13</sup>C NMR** (101 MHz, CDCl<sub>3</sub>) δ 141.3, 129.4, 123.0, 118.3, 57.7, 17.0, 13.2.

**HRMS** (ESI) *m/z*: [M+H]<sup>+</sup> Calcd for C<sub>9</sub>H<sub>14</sub>NOS<sup>+</sup>: 184.0796; found: 184.0790.

***N*-phenylbutane-1-sulfinamide (10)**

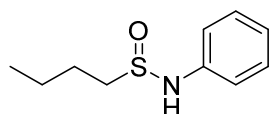

Yellow oil(31.5 mg, yield: 80%).

**<sup>1</sup>H NMR** (400 MHz, CDCl<sub>3</sub>) δ 7.25 (dd, *J* = 7.56, 6.19 Hz, 2H), 7.03 (dd, *J* = 7.97, 3.71 Hz, 3H), 6.81 (s, 1H), 3.01 – 2.94 (m, 2H), 1.77 – 1.65 (m, 2H), 1.52 – 1.37 (m, 2H), 0.94 (t, *J* = 7.34 Hz, 3H).

**<sup>13</sup>C NMR** (101 MHz, CDCl<sub>3</sub>) δ 141.3, 129.4, 123.1, 118.4, 55.8, 25.3, 21.8, 13.7.

**HRMS** (ESI) *m/z*: [M+H]<sup>+</sup> Calcd for C<sub>10</sub>H<sub>16</sub>NOS<sup>+</sup>:198.0953; found: 198.0950.

#### ***N*-phenylpentane-1-sulfonamide (11)**

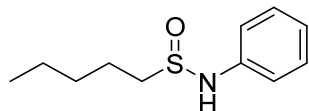

Yellow oil (31.7 mg, yield: 75%).

**<sup>1</sup>H NMR** (400 MHz, CDCl<sub>3</sub>) δ 7.31 (s, 1H), 7.22 (t, *J* = 7.64 Hz, 2H), 7.00 (dd, *J* = 19.06, 7.62 Hz, 3H), 2.99 (t, *J* = 7.65 Hz, 2H), 1.78 – 1.63 (m, 2H), 1.45 – 1.22 (m, 4H), 0.89 (t, *J* = 6.68 Hz, 3H).

**<sup>13</sup>C NMR** (101 MHz, CDCl<sub>3</sub>) δ 141.5, 129.4, 122.8, 118.1, 55.8, 30.7, 23.1, 22.3, 13.8.

**HRMS** (ESI) *m/z*: [M+H]<sup>+</sup> Calcd for C<sub>11</sub>H<sub>18</sub>NOS<sup>+</sup>:212.1109; found: 212.1106.

#### **2,2-dimethyl-*N*-phenylpropane-1-sulfonamide (12)**

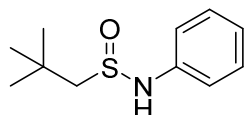

White solid (33.3 mg, yield: 79%), M.p.85-87°C.

**<sup>1</sup>H NMR** (400 MHz, CDCl<sub>3</sub>) δ 7.97 – 7.75 (m, 1H), 7.17 (t, *J* = 7.82 Hz, 2H), 7.00 (d, *J* = 7.95 Hz, 2H), 6.93 (t, *J* = 7.35 Hz, 1H), 3.09 (d, *J* = 13.15 Hz, 1H), 2.89 (d, *J* = 13.16 Hz, 1H), 1.08 (s, 9H).

**<sup>13</sup>C NMR** (101 MHz, CDCl<sub>3</sub>) δ 141.6, 129.4, 122.5, 117.7, 70.0, 30.9, 29.7.

**HRMS** (ESI) *m/z*: [M+Na]<sup>+</sup> Calcd for C<sub>11</sub>H<sub>17</sub>NOSNa<sup>+</sup>: 234.0929; found: 284.0921.

#### **1-cyclohexyl-*N*-phenylmethanesulfonamide (13)**

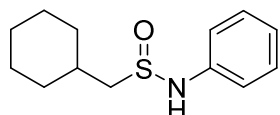

White solid (37.9 mg, yield: 80%), M.p.80-82°C.

**<sup>1</sup>H NMR** (400 MHz, CDCl<sub>3</sub>) δ 7.36 (s, 1H), 7.22 (t, *J* = 7.78 Hz, 2H), 7.08 – 6.93 (m, 3H), 2.99 – 2.89 (m, 1H), 2.86 – 2.78 (m, 1H), 1.93 (d, *J* = 12.66 Hz, 1H), 1.87 – 1.77 (m, 1H), 1.74 – 1.61 (m, 4H), 1.24 – 0.86 (m, 5H).

**<sup>13</sup>C NMR** (101 MHz, CDCl<sub>3</sub>) δ 141.5, 129.4, 122.8, 118.0, 63.2, 33.4, 32.9, 32.3, 26.0, 25.9, 25.7.

**HRMS** (ESI) *m/z*: [M+Na]<sup>+</sup> Calcd for C<sub>13</sub>H<sub>19</sub>NOSNa<sup>+</sup>: 260.1085; found: 260.1074.

#### ***N*,1-diphenylmethanesulfonamide (14)**

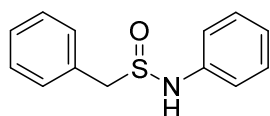

Yellow solid (32.8 mg, yield: 71%), M.p.107-109°C.

**<sup>1</sup>H NMR** (400 MHz, CDCl<sub>3</sub>) δ 7.41 – 7.32 (m, 5H), 7.21 (t, J = 7.89 Hz, 2H), 6.99 (t, J = 7.42 Hz, 1H), 6.93 (d, J = 7.64 Hz, 2H), 6.38 (s, 1H), 4.28 (d, J = 12.90 Hz, 1H), 4.12 (d, J = 12.91 Hz, 1H).

**<sup>13</sup>C NMR** (101 MHz, CDCl<sub>3</sub>) δ 140.9, 130.7, 129.4, 129.0, 128.7, 128.6, 123.3, 118.8, 61.3.

**HRMS** (ESI) m/z: [M+Na]<sup>+</sup> Calcd for C<sub>13</sub>H<sub>13</sub>NOSNa<sup>+</sup>: 254.0610; found: 254.0613.

***N*-phenyl-1-(*p*-tolyl)methanesulfinamide (15)**

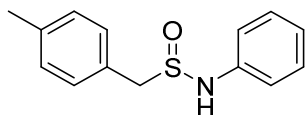

Yellow oil (35.6 mg, yield: 73%).

**<sup>1</sup>H NMR** (400 MHz, CDCl<sub>3</sub>) δ 7.20 (d, J = 13.19 Hz, 6H), 7.01 – 6.88 (m, 3H), 6.60 – 6.34 (m, 1H), 4.25 (d, J = 12.92 Hz, 1H), 4.08 (d, J = 12.95 Hz, 1H), 2.34 (s, 3H).

**<sup>13</sup>C NMR** (101 MHz, CDCl<sub>3</sub>) δ 141.1, 138.4, 130.6, 129.7, 129.4, 125.6, 123.2, 118.7, 61.0, 21.2.

**HRMS** (ESI) m/z: [M+Na]<sup>+</sup> Calcd for C<sub>14</sub>H<sub>15</sub>NOSNa<sup>+</sup>: 268.0772; found: 268.0773.

***N*-phenylprop-2-ene-1-sulfinamide (16)**

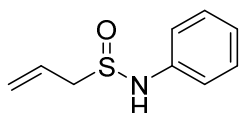

Yellow oil (24.6 mg, yield: 68%).

**<sup>1</sup>H NMR** (400 MHz, CDCl<sub>3</sub>) δ 7.39 – 7.17 (m, 2H), 7.12 – 6.90 (m, 3H), 6.31 (s, 1H), 6.06 – 5.88 (m, 1H), 5.54 (d, J = 10.19 Hz, 1H), 5.45 (d, J = 17.20 Hz, 1H), 3.79 (dd, J = 12.98, 6.37 Hz, 1H), 3.56 (dd, J = 12.95, 8.56 Hz, 1H).

**<sup>13</sup>C NMR** (101 MHz, CDCl<sub>3</sub>) δ 140.8, 129.5, 125.2, 124.4, 123.5, 118.9, 59.1.

**HRMS** (ESI) m/z: [M+Na]<sup>+</sup> Calcd for C<sub>9</sub>H<sub>11</sub>NOSNa<sup>+</sup>: 204.0459; found: 204.0451.

***N*-phenylbut-3-ene-1-sulfinamide (17)**

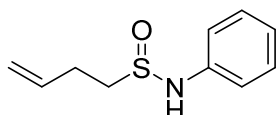

Yellow oil (30.4 mg, yield: 78%).

**<sup>1</sup>H NMR** (400 MHz, CDCl<sub>3</sub>) δ 7.53 (s, 1H), 7.23 – 7.16 (m, 2H), 7.04 – 6.92 (m, 3H), 5.89 – 5.70 (m, 1H), 5.18 – 5.01 (m, 2H), 3.08 (t, J = 7.53 Hz, 2H), 2.46 (q, J = 7.02 Hz, 2H).

**<sup>13</sup>C NMR** (101 MHz, CDCl<sub>3</sub>) δ 141.4, 134.7, 129.4, 122.9, 118.1, 117.1, 54.6, 27.6.

**HRMS** (ESI) m/z: [M+H]<sup>+</sup> Calcd for C<sub>10</sub>H<sub>14</sub>NOS<sup>+</sup>: 196.0796; found: 196.0784.

**2-methyl-*N*-phenylpropane-2-sulfinamide (18)**

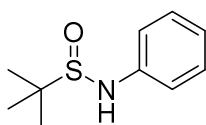

White solid (29.2 mg, yield: 74%), M.p. 82–84°C.

**<sup>1</sup>H NMR** (400 MHz, CDCl<sub>3</sub>) δ 7.30 – 7.14 (m, 2H), 7.05 – 6.92 (m, 3H), 5.97 (s, 1H), 1.31 (s, 9H).

**<sup>13</sup>C NMR** (101 MHz, CDCl<sub>3</sub>) δ 142.3, 129.3, 122.6, 118.1, 56.6, 22.5.

**HRMS** (ESI) m/z: [M+Na]<sup>+</sup> Calcd for C<sub>10</sub>H<sub>15</sub>NOSNa<sup>+</sup>: 220.0772; found: 220.0776.

***N*-phenylprop-1-ene-2-sulfinamide (19)**

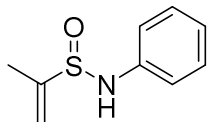

Yellow oil (25.3 mg, yield: 69%).

**<sup>1</sup>H NMR** (400 MHz, CDCl<sub>3</sub>) δ 7.30 (d, *J* = 7.50 Hz, 2H), 7.07 (d, *J* = 8.09 Hz, 3H), 6.06 (s, 1H), 5.76 (s, 1H), 5.69 (s, 1H), 2.06 (s, 3H).

**<sup>13</sup>C NMR** (101 MHz, CDCl<sub>3</sub>) δ 149.1, 140.9, 129.5, 123.6, 118.9, 118.8, 16.0.

**HRMS** (ESI) m/z: [M+H]<sup>+</sup> Calcd for C<sub>9</sub>H<sub>12</sub>NOS<sup>+</sup>: 182.0640; found: 182.0644.

***N*-phenylbenzenesulfinamide (20)**

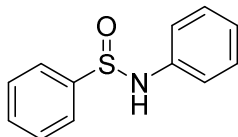

White solid (28.0 mg, yield: 65%), M.p.109-111°C.

**<sup>1</sup>H NMR** (400 MHz, CDCl<sub>3</sub>) δ 7.87 – 7.72(m, 2H), 7.63 – 7.46 (m, 3H), 7.29 (t, *J* = 7.74 Hz, 2H), 7.16 – 7.00 (m, 3H), 6.11 (s, 1H).

**<sup>13</sup>C NMR** (101 MHz, CDCl<sub>3</sub>) δ 144.6, 140.5, 131.5, 129.5, 129.1, 125.5, 123.8, 119.0.

**HRMS** (ESI) m/z: [M+Na]<sup>+</sup> Calcd for C<sub>12</sub>H<sub>11</sub>NOSNa<sup>+</sup>: 240.0459; found: 240.0454.

**2-fluoro-*N*-phenylbenzenesulfinamide (21)**

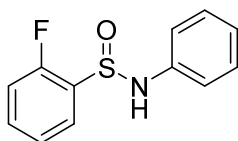

Yellow oil (28.2 mg, yield: 62%).

**<sup>1</sup>H NMR** (400 MHz, CDCl<sub>3</sub>) δ 7.85 (t, *J* = 7.34 Hz, 1H), 7.48 – 7.40 (m, 1H), 7.25 (t, *J* = 7.59 Hz, 1H), 7.19 (t, *J* = 7.81 Hz, 2H), 7.07 – 6.97 (m, 4H), 6.19 (s, 1H).

**<sup>13</sup>C NMR** (101 MHz, CDCl<sub>3</sub>) δ 158.6 (d, *J* = 252.5 Hz), 140.2, 133.6 (d, *J* = 8.1 Hz), 131.7 (d, *J* = 15.2 Hz), 129.4, 126.6, 124.7 (d, *J* = 3.6 Hz), 124.1, 119.7, 116.2, (d, *J* = 20.4 Hz).

**<sup>19</sup>F NMR** (376 MHz, CDCl<sub>3</sub>) δ -113.25.

**HRMS** (ESI) m/z: [M+H]<sup>+</sup> Calcd for C<sub>12</sub>H<sub>11</sub>FNOS<sup>+</sup>: 236.0545; found: 236.0592.

**2-methyl-*N*-phenylbenzenesulfinamide (22)**

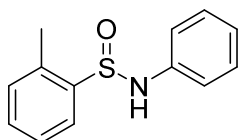

White solid (32.3 mg, yield: 70%), M.p.106-108°C.

<sup>1</sup>H NMR (400 MHz, CDCl<sub>3</sub>) δ 8.17 – 7.88 (m, 1H), 7.47 – 7.38 (m, 2H), 7.33 – 7.20 (m, 3H), 7.13 – 7.00 (m, 3H), 5.93 (s, 1H), 2.46 (s, 3H).

<sup>13</sup>C NMR (101 MHz, CDCl<sub>3</sub>) δ 142.5, 141.0, 135.9, 131.5, 131.1, 129.6, 126.8, 123.7, 123.5, 118.3, 18.5.

HRMS (ESI) m/z: [M+H]<sup>+</sup> Calcd for C<sub>13</sub>H<sub>14</sub>NOS<sup>+</sup>: 232.0796; found: 231.07867.

### 3-methyl-N-phenylbenzenesulfonamide (23)

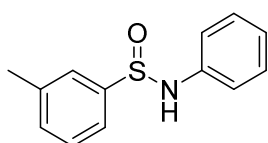

White solid (30.1 mg, yield: 67%), M.p.102-104°C.

<sup>1</sup>H NMR (400 MHz, CDCl<sub>3</sub>) δ 7.63 (s, 1H), 7.58 (d, *J* = 7.79 Hz, 1H), 7.42 (t, *J* = 7.61 Hz, 1H), 7.37 – 7.24 (m, 3H), 7.14 – 7.02 (m, 3H), 6.08 (s, 1H), 2.44 (s, 3H).

<sup>13</sup>C NMR (101 MHz, CDCl<sub>3</sub>) δ 144.5, 140.7, 139.4, 132.3, 129.5, 129.0, 125.7, 123.7, 122.5, 118.8, 21.4.

HRMS (ESI) m/z: [M+H]<sup>+</sup> Calcd for C<sub>13</sub>H<sub>14</sub>NOS<sup>+</sup>: 232.0796; found: 232.0784.

### 3-fluoro-N-phenylbenzenesulfonamide (24)

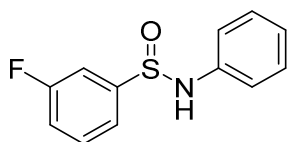

Yellow oil (30.1 mg, yield: 64%).

<sup>1</sup>H NMR (400 MHz, CDCl<sub>3</sub>) δ 7.61 – 7.45 (m, 3H), 7.35 – 7.17 (m, 3H), 7.09 (d, *J* = 7.56 Hz, 3H), 6.30 (s, 1H).

<sup>13</sup>C NMR (101 MHz, CDCl<sub>3</sub>) δ 162.9(d, *J* = 252.4 Hz), 147.0, 140.2, 130.8(d, *J* = 7.62 Hz), 129.6, 124.1, 121.4(d, *J* = 3.23 Hz), 119.3, 118.6 (d, *J* = 21.5 Hz), 113.1(d, *J* = 24.2 Hz).

<sup>19</sup>F NMR (376 MHz, CDCl<sub>3</sub>) δ -109.88.

HRMS (ESI) m/z: [M+H]<sup>+</sup> Calcd for C<sub>12</sub>H<sub>11</sub>FNOS<sup>+</sup>: 236.0545; found: 236.0590.

### 4-methyl-N-phenylbenzenesulfonamide (25)

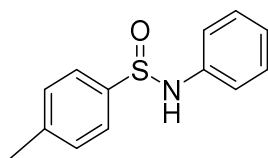

White solid (33.3 mg, yield: 72%), M.p.101-102°C.

**<sup>1</sup>H NMR** (400 MHz, CDCl<sub>3</sub>) δ 7.68 (d, *J* = 8.27 Hz, 2H), 7.37 – 7.25 (m, 4H), 7.14 – 7.02 (m, 3H), 6.05 (s, 1H), 2.43 (s, 3H).

**<sup>13</sup>C NMR** (101 MHz, CDCl<sub>3</sub>) δ 142.0, 141.6, 140.7, 129.8, 129.5, 125.4, 123.6, 118.9, 21.4.

**HRMS** (ESI) *m/z*: [M+Na]<sup>+</sup> Calcd for C<sub>13</sub>H<sub>13</sub>NOSNa<sup>+</sup>: 254.0616; found: 254.0607.

#### 4-fluoro-*N*-phenylbenzenesulfinamide (26)

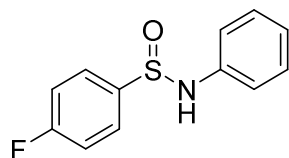

White solid (30.7 mg, yield: 65%), M.p. 115-116°C.

**<sup>1</sup>H NMR** (400 MHz, CDCl<sub>3</sub>) δ 7.92 – 7.61 (m, 2H), 7.34 – 7.25 (m, 2H), 7.21 (t, *J* = 8.56 Hz, 2H), 7.13 – 6.99 (m, 3H), 6.23 (s, 1H).

**<sup>13</sup>C NMR** (101 MHz, CDCl<sub>3</sub>) δ 164.6 (d, *J* = 252.2 Hz), 140.2, 140.1, 129.5, 128.0 (d, *J* = 9.1 Hz), 124.0, 119.3, 116.3 (d, *J* = 22.5 Hz).

**<sup>19</sup>F NMR** (376 MHz, CDCl<sub>3</sub>) δ -108.3.

**HRMS** (ESI) *m/z*: [M+Na]<sup>+</sup> Calcd for C<sub>12</sub>H<sub>10</sub>FNOSNa<sup>+</sup>: 258.0365; found: 258.0361.

#### 4-chloro-*N*-phenylbenzenesulfinamide (27)

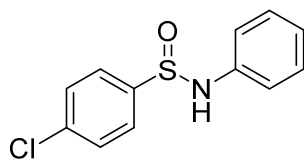

Yellow oil (33.7 mg, yield: 67%), M.p. 144-145°C.

**<sup>1</sup>H NMR** (400 MHz, CDCl<sub>3</sub>) δ 7.71 (d, *J* = 8.46 Hz, 2H), 7.49 (d, *J* = 8.53 Hz, 2H), 7.28 (t, *J* = 8.04 Hz, 2H), 7.08 (d, *J* = 8.06 Hz, 3H), 6.28 (s, 1H).

**<sup>13</sup>C NMR** (101 MHz, CDCl<sub>3</sub>) δ 143.0, 140.2, 137.8, 129.6, 129.4, 127.1, 124.1, 119.3.

**HRMS** (ESI) *m/z*: [M+Na]<sup>+</sup> Calcd for C<sub>12</sub>H<sub>10</sub>ClNOSNa<sup>+</sup>: 274.0064; found: 274.0061.

#### *N*-(2-chlorophenyl)cyclopentanesulfinamide (28)

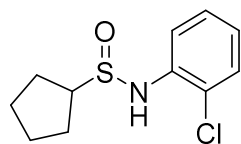

Yellow oil (36.0 mg, yield: 74%).

**<sup>1</sup>H NMR** (400 MHz, CDCl<sub>3</sub>) δ 7.42 – 7.29 (m, 2H), 7.21 (t, *J* = 7.76 Hz, 1H), 6.94 (t, *J* = 7.70 Hz, 1H), 6.40 (s, 1H), 3.51 – 3.32 (m, 1H), 2.27 – 2.11 (m, 1H), 2.10 – 1.93 (m, 2H), 1.88 – 1.63 (m, 5H).

**<sup>13</sup>C NMR** (101 MHz, CDCl<sub>3</sub>) δ 138.4, 129.7, 128.0, 123.3, 122.8, 117.8, 64.3, 27.4, 26.2, 26.0, 25.9.

**HRMS** (ESI) *m/z*: [M+H]<sup>+</sup> Calcd for C<sub>11</sub>H<sub>15</sub>ClNOS<sup>+</sup>: 244.0563; found: 244.0566.

#### *N*-(2-methoxyphenyl)cyclopentanesulfinamide (29)

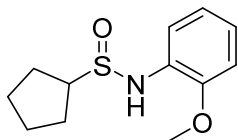

Yellow oil (35.8 mg, yield: 78%).

**<sup>1</sup>H NMR** (400 MHz, CDCl<sub>3</sub>) δ 7.31 – 7.17 (m, 1H), 7.01 – 6.88 (m, 2H), 6.85 (d, *J* = 7.84 Hz, 1H), 6.29 (s, 1H), 3.83 (s, 3H), 3.42 – 3.25 (m, 1H), 2.25 – 2.11 (m, 1H), 2.09 – 1.92 (m, 2H), 1.84 – 1.62 (m, 5H).

**<sup>13</sup>C NMR** (101 MHz, CDCl<sub>3</sub>) δ 148.6, 131.1, 122.8, 121.2, 116.8, 110.8, 64.2, 55.7, 27.5, 26.3, 26.0, 25.9.

**HRMS** (ESI) *m/z*: [M+H]<sup>+</sup> Calcd for C<sub>12</sub>H<sub>18</sub>NO<sub>2</sub>S<sup>+</sup>: 240.1058; found: 240.1050.

***N*-(2-(tert-butyl)phenyl)cyclopentanesulfinamide (30)**

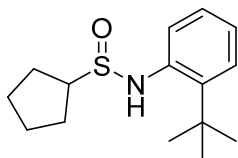

Yellow oil (38.7 mg, yield: 73%).

**<sup>1</sup>H NMR** (400 MHz, CDCl<sub>3</sub>) δ 7.39 (d, *J* = 9.43 Hz, 1H), 7.34 (d, *J* = 9.54 Hz, 1H), 7.19 (t, *J* = 7.63 Hz, 1H), 7.02 (t, *J* = 7.63 Hz, 1H), 5.95 (s, 1H), 3.44 – 3.27 (m, 1H), 2.30 – 2.15 (m, 1H), 2.10 – 1.97 (m, 2H), 1.93 – 1.67 (m, 5H), 1.44 (s, 9H).

**<sup>13</sup>C NMR** (101 MHz, CDCl<sub>3</sub>) δ 140.2, 138.9, 127.3, 126.9, 123.5, 120.9, 64.2, 34.4, 30.9, 27.7, 26.0, 25.8, 25.6.

**HRMS** (ESI) *m/z*: [M+Na]<sup>+</sup> Calcd for C<sub>15</sub>H<sub>23</sub>NOSNa<sup>+</sup>: 288.1398; found: 288.1393.

***N*-(3-fluorophenyl)cyclopentanesulfinamide (31)**

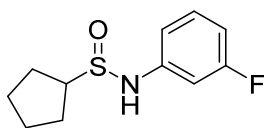

Yellow oil (34.05 mg, yield: 75%).

**<sup>1</sup>H NMR** (400 MHz, CDCl<sub>3</sub>) δ 7.75 (s, 1H), 7.18 – 7.06 (m, 1H), 6.83 – 6.71 (m, 2H), 6.63 (d, *J* = 2.37 Hz, 1H), 3.55 – 3.43 (m, 1H), 2.22 – 2.02 (m, 1H), 2.00 – 1.82 (m, 2H), 1.79 – 1.61 (m, 5H).

**<sup>13</sup>C NMR** (101 MHz, CDCl<sub>3</sub>) δ 163.4 (d, *J* = 245.5 Hz), 144.0 (d, *J* = 10.2 Hz), 130.5 (d, *J* = 9.7 Hz), 112.8 (d, *J* = 2.8 Hz), 108.9 (d, *J* = 21.3 Hz), 104.5 (d, *J* = 25.4 Hz), 64.0, 27.4, 27.4, 25.9, 25.8.

**<sup>19</sup>F NMR** (376 MHz, CDCl<sub>3</sub>) δ -111.68.

**HRMS** (ESI) *m/z*: [M+H]<sup>+</sup> Calcd for C<sub>11</sub>H<sub>15</sub>FNOS<sup>+</sup>: 228.0858; found: 228.0853.

***N*-(3-bromophenyl)cyclopentanesulfinamide (32)**

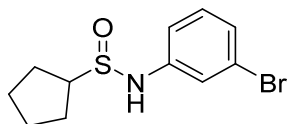

Yellow oil (41.3 mg, yield: 72%).

**<sup>1</sup>H NMR** (400 MHz, CDCl<sub>3</sub>) δ 7.93 (s, 1H), 7.19 (s, 1H), 7.13 – 6.98 (m, 2H), 6.96 – 6.89 (m, 1H), 3.78 – 2.99 (m, 1H), 2.18 – 2.01 (m, 1H), 2.00 – 1.80 (m, 2H), 1.77 – 1.50 (m, 5H).

**<sup>13</sup>C NMR** (101 MHz, CDCl<sub>3</sub>) δ 143.7, 130.6, 125.2, 123.1, 120.1, 115.7, 64.0, 27.5, 27.4, 25.9, 25.8.

**HRMS** (ESI) m/z: [M+Na]<sup>+</sup> Calcd for C<sub>11</sub>H<sub>14</sub>BrNOSNa<sup>+</sup>: 309.9877; found:309.9876.

### ***N*-(3-methoxyphenyl)cyclopentanesulfonamide (33)**

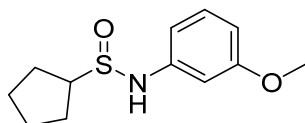

Yellow oil (36.0 mg, yield: 76%).

**<sup>1</sup>H NMR** (400 MHz, CDCl<sub>3</sub>) δ 7.41 (s, 1H), 7.10 (t, *J* = 8.09 Hz, 1H), 6.66 – 6.55 (m, 2H), 6.53 – 6.47 (m, 1H), 3.71 (s, 3H), 3.55 – 3.36 (m, 1H), 2.22 – 2.01 (m, 1H), 1.97 – 1.84 (m, 2H), 1.77 – 1.61 (m, 5H).

**<sup>13</sup>C NMR** (101 MHz, CDCl<sub>3</sub>) δ 160.5, 143.4, 130.1, 109.9, 108.1, 103.4, 64.0, 55.2, 27.5, 27.3, 25.9, 25.8.

**HRMS** (ESI) m/z: [M+H]<sup>+</sup> Calcd for C<sub>12</sub>H<sub>18</sub>NO<sub>2</sub>S<sup>+</sup>: 240.1058; found: 240.1051.

### ***N*-(4-chlorophenyl)cyclopentanesulfonamide(34)**

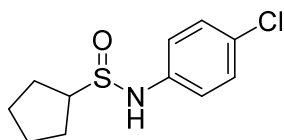

Yellow oil (38.4 mg, yield: 79%).

**<sup>1</sup>H NMR** (400 MHz, CDCl<sub>3</sub>) δ 7.20 (d, *J* = 7.29 Hz, 2H), 6.96 (d, *J* = 7.88 Hz, 2H), 6.58 (s, 1H), 3.40 (d, *J* = 5.82 Hz, 1H), 2.19 – 2.08 (m, 1H), 1.97 (s, 2H), 1.81 – 1.63 (m, 5H).

**<sup>13</sup>C NMR** (101 MHz, CDCl<sub>3</sub>) δ 140.3, 129.4, 128.1, 119.6, 64.2, 27.5, 26.8, 25.9, 25.8.

**HRMS** (ESI) m/z: [M+H]<sup>+</sup> Calcd for C<sub>11</sub>H<sub>15</sub>ClNOS<sup>+</sup>: 244.0563; found: 244.0565.

### ***N*-(4-bromophenyl)cyclopentanesulfonamide (35)**

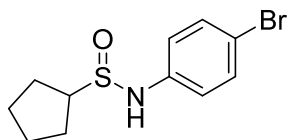

Yellow oil (45.7 mg, yield: 80%).

**<sup>1</sup>H NMR** (400 MHz, CDCl<sub>3</sub>) δ 7.41 (s, 1H), 7.30 (d, *J* = 8.38 Hz, 2H), 6.94 – 6.82 (m, 2H), 3.51 – 3.40(m, 1H), 2.15 – 2.02 (m, 1H), 1.97 – 1.83 (m, 2H), 1.78 – 1.56 (m, 5H).



$^{13}\text{C}$  NMR (101 MHz,  $\text{CDCl}_3$ )  $\delta$  141.1, 132.2, 119.3, 115.0, 64.1, 27.4, 27.2, 25.9, 25.8.

HRMS (ESI)  $m/z$ :  $[\text{M}+\text{Na}]^+$  Calcd for  $\text{C}_{11}\text{H}_{14}\text{BrNOSNa}^+$ : 309.9877; found:309.9870.

#### *N*-(4-iodophenyl)cyclopentanesulfinamide (36)

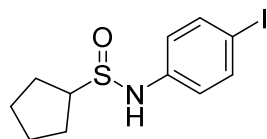

Yellow oil (51.4 mg, yield: 77%).

$^1\text{H}$  NMR (400 MHz,  $\text{DMSO}-d_6$ )  $\delta$  8.81 (s, 1H), 7.58 (d,  $J = 8.43$  Hz, 2H), 6.88 (d,  $J = 8.40$  Hz, 2H), 3.51 – 3.40 (m, 1H), 2.02 – 1.81 (m, 3H), 1.66 – 1.54 (m, 5H).

$^{13}\text{C}$  NMR (101 MHz,  $\text{DMSO}-d_6$ )  $\delta$  143.5, 138.3, 119.7, 84.6, 63.0, 27.4, 27.2, 26.0, 25.9.

HRMS (ESI)  $m/z$ :  $[\text{M}+\text{H}]^+$  Calcd for  $\text{C}_{11}\text{H}_{15}\text{INOS}^+$ : 335.9919 found:335.9913.

#### *N*-(*p*-tolyl)cyclopentanesulfinamide (37)

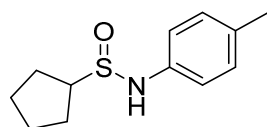

Yellow oil (32.6 mg, yield: 73%).

$^1\text{H}$  NMR (400 MHz,  $\text{CDCl}_3$ )  $\delta$  7.06 (d,  $J = 8.03$  Hz, 2H), 6.94 (d,  $J = 8.34$  Hz, 2H), 6.20 (s, 1H), 3.40 – 3.28 (m, 1H), 2.28 (s, 3H), 2.18 – 2.08 (m, 1H), 2.02 – 1.90 (m, 2H), 1.83 – 1.60 (m, 5H).

$^{13}\text{C}$  NMR (101 MHz,  $\text{CDCl}_3$ )  $\delta$  138.9, 132.7, 129.9, 119.0, 64.1, 27.5, 26.7, 25.9, 25.9, 20.7.

HRMS (ESI)  $m/z$ :  $[\text{M}+\text{Na}]^+$  Calcd for  $\text{C}_{12}\text{H}_{17}\text{NOSNa}^+$ : 246.0929; found: 246.0923.

#### *N*-(4-(trifluoromethyl)phenyl)cyclopentanesulfinamide (38)

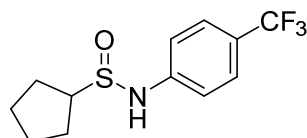

Yellow oil (39.3 mg, yield: 71%).

$^1\text{H}$  NMR (400 MHz,  $\text{CDCl}_3$ )  $\delta$  7.59 (d,  $J = 4.44$  Hz, 1H), 7.43 (d,  $J = 8.33$  Hz, 2H), 7.05 (d,  $J = 8.36$  Hz, 2H), 3.64 – 3.39 (m, 1H), 2.27 – 2.06 (m, 1H), 1.9 – 1.91 (m, 2H), 1.83 – 1.59 (m, 5H).

$^{13}\text{C}$  NMR (101 MHz,  $\text{CDCl}_3$ )  $\delta$  145.3, 126.6 (d,  $J = 3.85$  Hz), 124.2 (d,  $J = 272.70$  Hz), 124.1 (d,  $J = 32.95$  Hz), 116.5, 64.1, 27.4, 27.3, 25.9, 25.8.

$^{19}\text{F}$  NMR (376 MHz,  $\text{CDCl}_3$ )  $\delta$  -61.94.

HRMS (ESI)  $m/z$ :  $[\text{M}+\text{H}]^+$  Calcd for  $\text{C}_{12}\text{H}_{15}\text{F}_3\text{NOS}^+$ : 278.0826; found: 278.0822.

#### *N*-phenylcyclohexanesulfinamide (39)

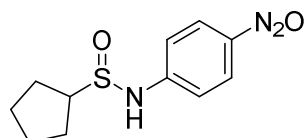

Yellow oil (35.8 mg, yield: 71%).

**<sup>1</sup>H NMR** (400 MHz, DMSO-*d*<sub>6</sub>) δ 9.72 (s, 1H), 8.18 (d, *J* = 9.10 Hz, 2H), 7.19 (d, *J* = 9.13 Hz, 2H), 3.59 – 3.51 (m, 1H), 2.04 – 1.87 (m, 3H), 1.74 – 1.50 (m, 5H).

**<sup>13</sup>C NMR** (101 MHz, DMSO-*d*<sub>6</sub>) δ 150.4, 141.2, 126.3, 115.9, 63.2, 27.3, 27.0, 25.9, 25.9.

**HRMS** (ESI) *m/z*: [M+H]<sup>+</sup> Calcd for C<sub>11</sub>H<sub>14</sub>N<sub>3</sub>O<sub>2</sub>S<sup>+</sup>: 253.0885; found: 253.0883.

***N*-(3,5-dichlorophenyl)cyclopentanesulfinamide (40)**

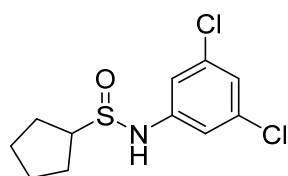

Yellow oil (41.0 mg, yield: 74%).

**<sup>1</sup>H NMR** (400 MHz, CDCl<sub>3</sub>) δ 8.08 (s, 1H), 6.91 (d, *J* = 2.82 Hz, 3H), 3.65 – 3.32 (m, 1H), 2.27 – 2.03 (m, 1H), 2.01 – 1.84 (m, 2H), 1.75 – 1.63 (m, 5H).

**<sup>13</sup>C NMR** (101 MHz, CDCl<sub>3</sub>) δ 144.3, 135.7, 122.2, 115.3, 64.2, 27.4, 27.4, 25.9, 25.8.

**HRMS** (ESI) *m/z*: [M+Na]<sup>+</sup> Calcd for C<sub>11</sub>H<sub>13</sub>Cl<sub>2</sub>NOSNa<sup>+</sup>: 299.9993; found: 299.9988.

***N*-(3,4,5-trimethoxyphenyl)cyclopentanesulfinamide (41)**

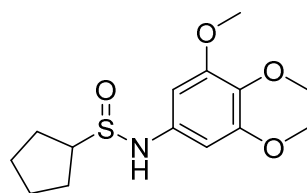

Yellow oil (47.8 mg, yield: 80%).

**<sup>1</sup>H NMR** (400 MHz, CDCl<sub>3</sub>) δ 7.12 (s, 1H), 6.27 (s, 2H), 3.77 (d, *J* = 6.73 Hz, 9H), 3.57 – 3.43 (m, 1H), 2.23 – 2.04 (m, 1H), 2.02 – 1.86 (m, 2H), 1.77 – 1.72 (m, 5H).

**<sup>13</sup>C NMR** (101 MHz, CDCl<sub>3</sub>) δ 153.7, 138.1, 133.6, 95.7, 64.0, 60.9, 56.0, 27.5, 27.2, 25.9, 25.8.

**HRMS** (ESI) *m/z*: [M+H]<sup>+</sup> Calcd for C<sub>14</sub>H<sub>22</sub>NO<sub>4</sub>S<sup>+</sup>: 300.1270; found: 300.1269.

***N*-tritylcyclopentanesulfinamide (42)**

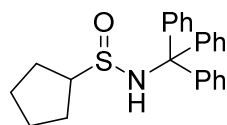

White solid (55.5 mg, yield: 74%), M.p. 120-122°C.

**<sup>1</sup>H NMR** (400 MHz, CDCl<sub>3</sub>) δ 7.45 – 7.19 (m, 15H), 4.79 (s, 1H), 3.30 – 2.97 (m, 1H), 2.13 – 1.99 (m, 1H), 1.96 – 1.83 (m, 2H), 1.73 – 1.56 (m, 5H).

**<sup>13</sup>C NMR** (101 MHz, CDCl<sub>3</sub>) δ 144.9, 129.4, 127.9, 127.4, 72.9, 65.1, 28.3, 25.9, 25.7, 25.5.

**HRMS** (ESI) *m/z*: [M+Na]<sup>+</sup> Calcd for C<sub>24</sub>H<sub>25</sub>NOSNa<sup>+</sup>: 398.1555; found: 398.1557.

***N*-pentylcyclopentanesulfinamide (43)**

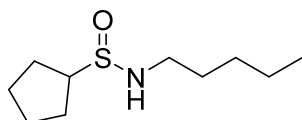

White solid (28.4 mg, yield: 70%), M.p.118-120°C.

**<sup>1</sup>H NMR** (400 MHz, CDCl<sub>3</sub>) δ 3.81 – 3.64 (m, 1H), 3.14 – 2.99, (m, 3H), 2.08 – 1.94 (m, 1H), 1.93 – 1.79 (m, 2H), 1.73 – 1.60 (m, 4H), 1.59 – 1.48 (m, 3H), 1.29 (s, 4H), 0.89 – 0.82 (m, 3H).

**<sup>13</sup>C NMR** (101 MHz, CDCl<sub>3</sub>) δ 63.3, 43.4, 30.5, 28.9, 27.6, 26.5, 25.8, 25.7, 22.3, 13.9.

**HRMS** (ESI) m/z: [M+Na]<sup>+</sup> Calcd for C<sub>10</sub>H<sub>21</sub>NOSNa<sup>+</sup>:226.1242; found: 226.1243.

***N*-methyl-*N'*-phenyl-*N*-(*o*-tolyl)butane-1-sulfonimidamide (44)**

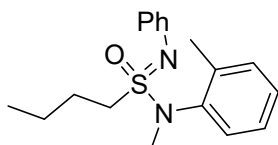

Brown oil (33.4 mg, yield: 53%).

**<sup>1</sup>H NMR** (400 MHz, CDCl<sub>3</sub>) δ 7.30 – 7.04 (m, 8H), 7.01 – 6.91(m, 1H), 3.46 – 3.33 (m, 1H), 3.19 (s, 3H), 3.14 – 3.03 (m, 1H), 2.17 (s, 3H), 2.07 – 1.97 (m, 2H), 1.56 – 1.42(m, 2H), 0.98 (t, J = 7.36 Hz, 3H).

**<sup>13</sup>C NMR** (101 MHz, CDCl<sub>3</sub>) δ 144.3, 141.2, 131.6, 128.9, 128.0, 126.8, 124.1, 122.1, 39.7, 25.9, 21.8, 18.2, 13.8.

**HRMS** (ESI) m/z: [M+H]<sup>+</sup> Calcd for C<sub>18</sub>H<sub>25</sub>N<sub>2</sub>OS<sup>+</sup>: 317.1688; found: 317.1684.

**4-(*N*-phenylbutylsulfonimidoyl)morpholine (45)**

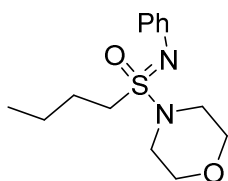

Yellow oil (34.9 mg, yield: 62%).

**<sup>1</sup>H NMR** (400 MHz, CDCl<sub>3</sub>) δ 7.21 (t, J = 7.75 Hz, 2H), 7.11 (d, J = 8.28 Hz, 2H), 6.95 (t, J = 7.30 Hz, 1H), 3.70 – 3.61 (m, 2H), 3.61 – 3.50 (m, 2H), 3.36 – 3.24 (m, 4H), 3.23 – 3.10 (m, 1H), 3.06 – 2.87 (m, 1H), 2.02 – 1.78 (m, 2H), 1.55 – 1.40 (m, 2H), 0.98 (t, J = 7.37 Hz, 3H).

**<sup>13</sup>C NMR** (101 MHz, CDCl<sub>3</sub>) δ 143.9, 129.0, 123.4, 121.9, 66.6, 50.9, 46.6, 25.2, 21.7, 13.7.

**HRMS** (ESI) m/z: [M+H]<sup>+</sup> Calcd for C<sub>14</sub>H<sub>23</sub>N<sub>2</sub>O<sub>2</sub>S<sup>+</sup>: 283.1480; found: 283.1477.

***N,N'*-bis(4-chlorophenyl)cyclopentanesulfonimidamide (46)**

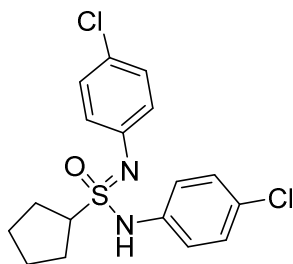

Brown oil (46.3 mg, yield: 63%).

**<sup>1</sup>H NMR** (400 MHz, CDCl<sub>3</sub>) δ 7.20 (d, J = 8.35 Hz, 4H), 7.10 (d, J = 8.34 Hz, 4H), 3.82 – 3.66 (m, 1H), 2.24 – 2.10 (m, 2H), 2.06 – 1.95 (m, 2H), 1.89 – 1.76 (m, 2H), 1.70 – 1.56 (m, 2H).

**<sup>13</sup>C NMR** (101 MHz, CDCl<sub>3</sub>) δ 129.3, 128.8, 123.0, 62.7, 28.0, 25.8.

**HRMS** (ESI) m/z: [M+H]<sup>+</sup> Calcd for C<sub>17</sub>H<sub>19</sub>Cl<sub>2</sub>N<sub>2</sub>OS<sup>+</sup>:369.0595; found: 369.0590.

**4-chlorophenyl N-phenylbutane-1-sulfonimide (47)**

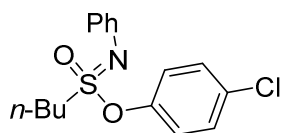

Yellow oil (42.6 mg, yield: 66%).

**<sup>1</sup>H NMR** (400 MHz, CDCl<sub>3</sub>) δ 7.30 (d, J = 8.57 Hz, 2H), 7.23 (d, J = 7.51 Hz, 2H), 7.09 (t, J = 7.59 Hz, 4H), 7.03 (t, J = 7.34 Hz, 1H), 3.48 – 3.26 (m, 2H), 2.12 – 1.99 (m, 2H), 1.57 – 1.47 (m, 2H), 1.02 (t, J = 7.36 Hz, 3H).

**<sup>13</sup>C NMR** (101 MHz, CDCl<sub>3</sub>) δ 129.9, 129.8, 129.2, 129.1, 124.8, 123.9, 123.9, 123.6, 52.6, 25.6, 21.4, 13.6.

**HRMS** (ESI) m/z: [M+H]<sup>+</sup> Calcd for C<sub>16</sub>H<sub>18</sub>ClNO<sub>2</sub>S<sup>+</sup>:348.0644; found:348.0648

**N-phenylbenzenesulfonamide(48)**

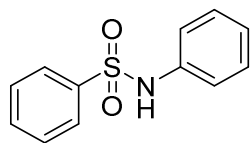

White solid (31.0 mg, yield: 67%), M.p.108-110°C.

**<sup>1</sup>H NMR** (400 MHz, CDCl<sub>3</sub>) δ 7.80 (d, J = 7.62 Hz, 2H), 7.52 (t, J = 7.44 Hz, 1H), 7.43 (t, J = 7.69 Hz, 2H), 7.30 – 7.19 (m, 2H), 7.19 – 7.02 (m, 4H).

**<sup>13</sup>C NMR** (101 MHz, CDCl<sub>3</sub>) δ 139.0, 136.4, 133.1, 129.3, 129.1, 127.3, 125.5, 121.7.

**HRMS** (ESI) m/z: [M+H]<sup>+</sup> Calcd for C<sub>12</sub>H<sub>12</sub>NO<sub>2</sub>S<sup>+</sup>: 234.0589; found: 234.0583.

## References

1. Chemes, D. M.; Alonso de Armiño, D. J.; Cutin, E. H.; Oberhammer, H.; Robles, N. L., Synthesis, characterization and vibrational studies of p-chlorosulfinylaniline. *Journal of Molecular Structure* **2017**, *1127*, 191-198.
2. Endeshaw, M. M.; Hansen, L. K.; Gautun, O. R., Preparation and evaluation of N-sulfinyl dienophiles for asymmetric hetero-diels-alder reactions. *Journal of Heterocyclic Chemistry* **2008**, *45*, 149-154.
3. Fan, M.; Chen, G.; Xiang, Y.; Li, J.; Yu, X.; Zhang, W.; Long, X.; Xu, L.; Wu, J.; Xu, Z.; Zhang, Q., Anthrathiadiazole Derivatives: Synthesis, Physical Properties and Two-photon Absorption. *Chemistry – A European Journal* **2021**, *27*, 10898-10902.
4. Li, L.; Zhang, S.-q.; Chen, Y.; Cui, X.; Zhao, G.; Tang, Z.; Li, G.-x., Photoredox Alkylation of Sulfinylamine Enables the Synthesis of Highly Functionalized Sulfinamides and S(VI) Derivatives. *ACS Catalysis* **2022**, *12*, 15334-15340.
5. Longobardi, L. E.; Wolter, V.; Stephan, D. W., Frustrated Lewis Pair Activation of an N-Sulfinylamine: A Source of Sulfur Monoxide. *Angewandte Chemie International Edition* **2015**, *54*, 809-812.

## 7. NMR Spectra

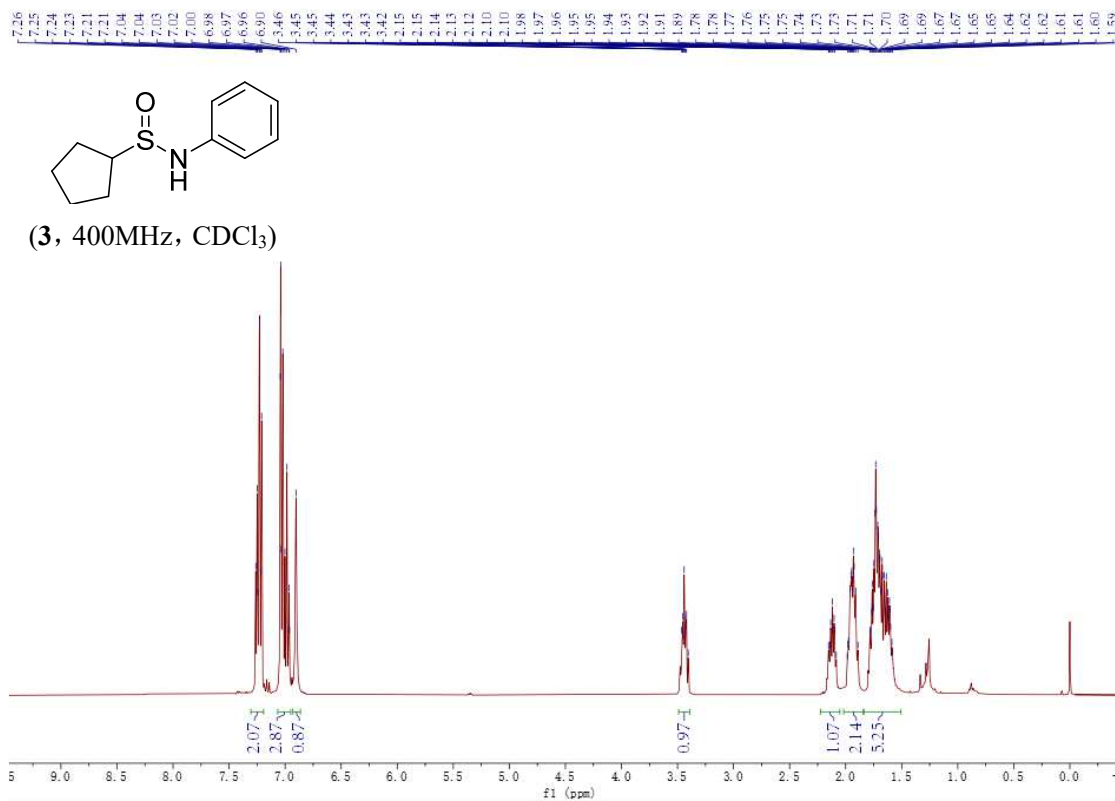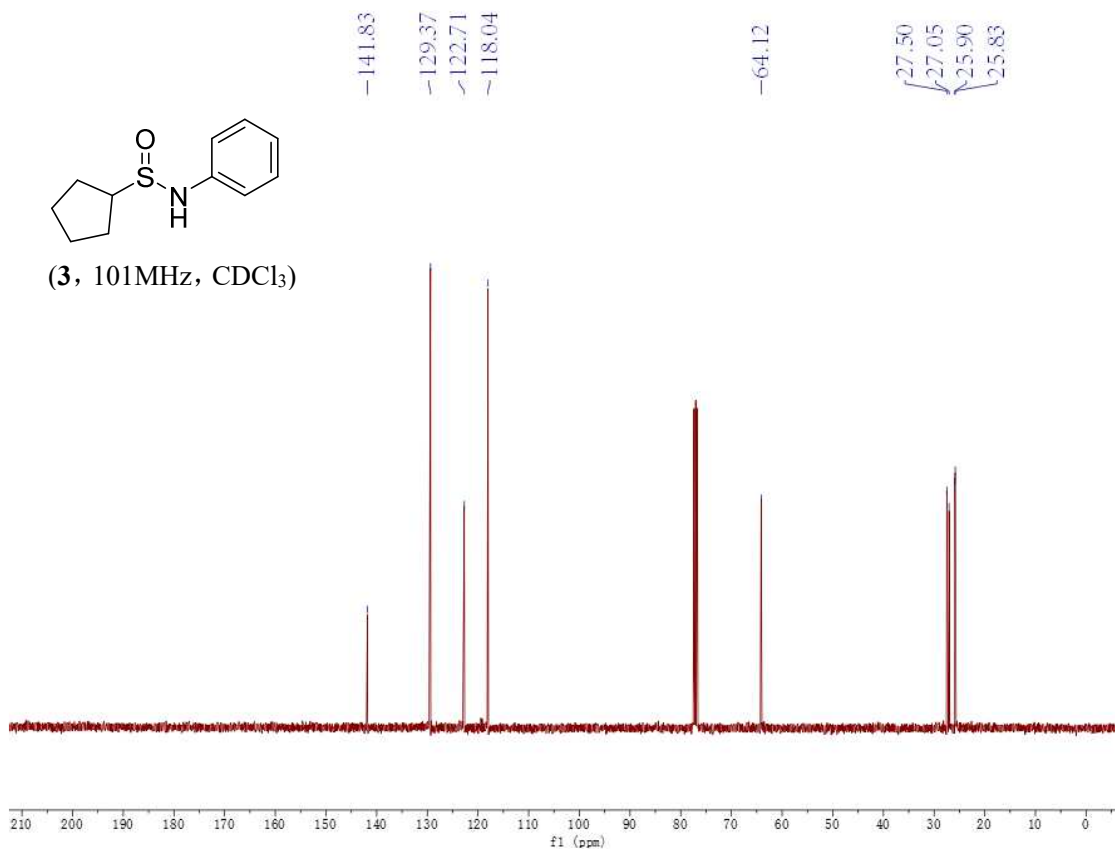

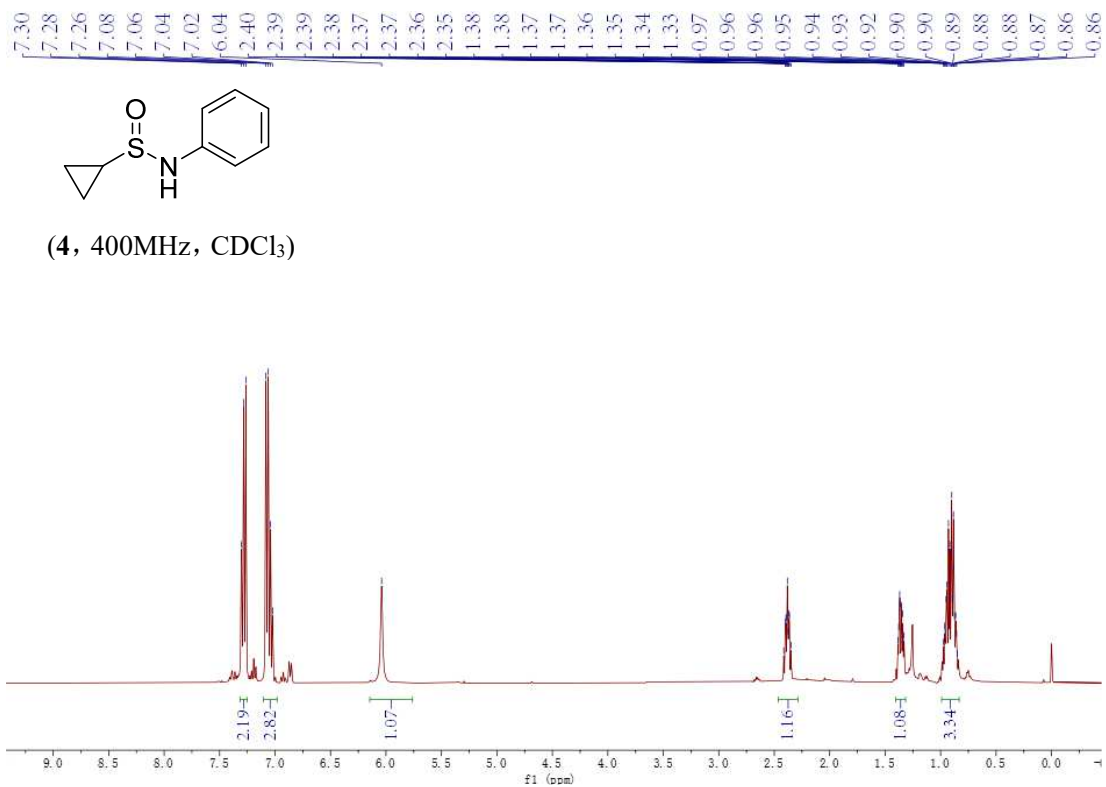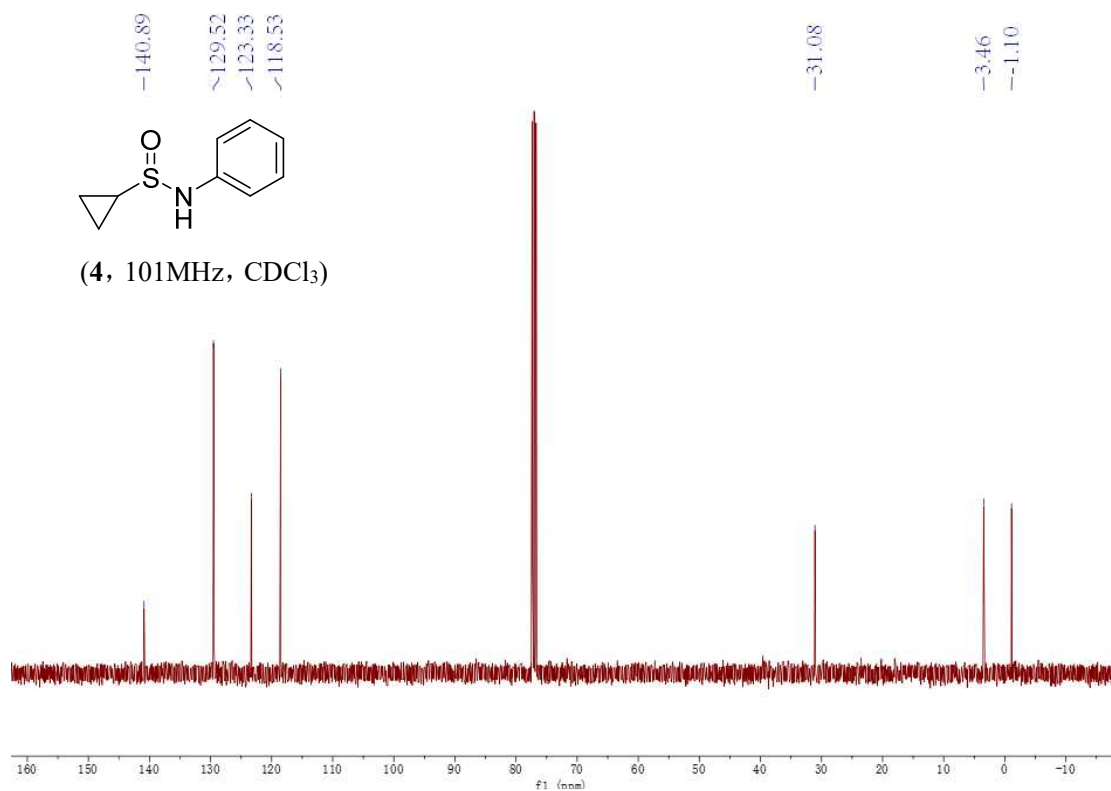

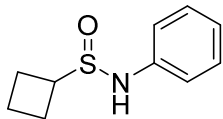

(5, 400MHz, CDCl<sub>3</sub>)

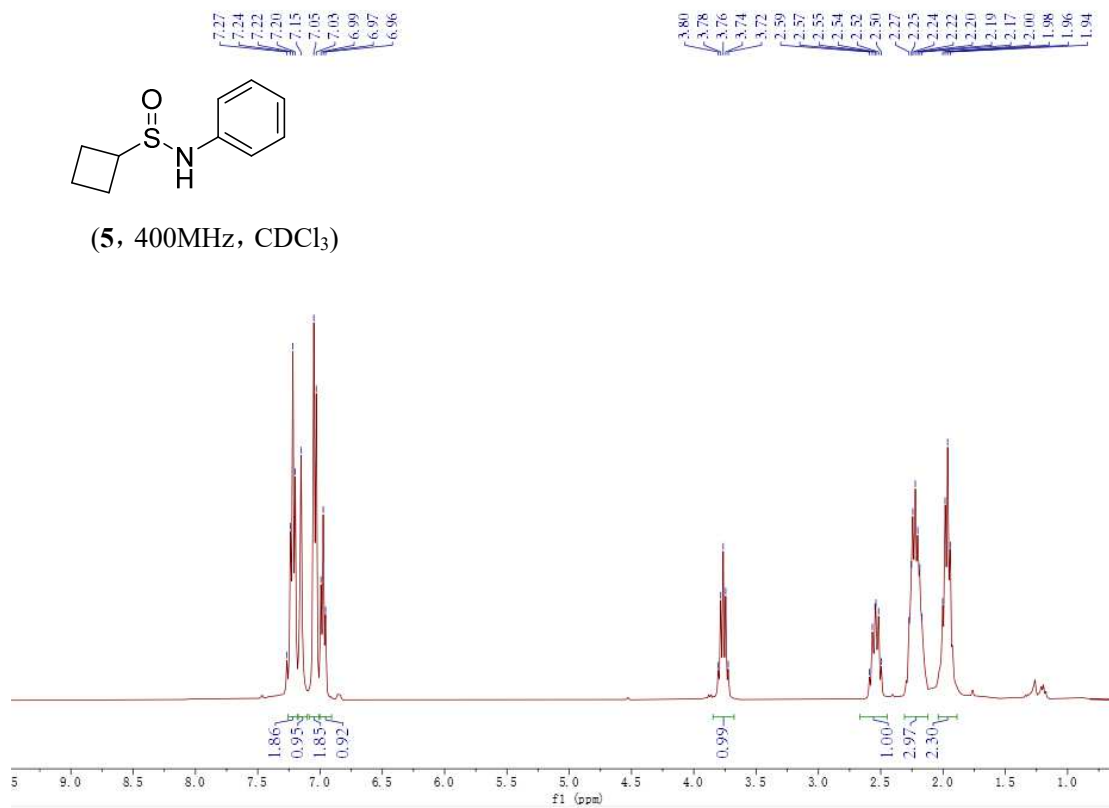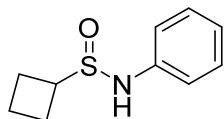

(5, 101MHz, CDCl<sub>3</sub>)

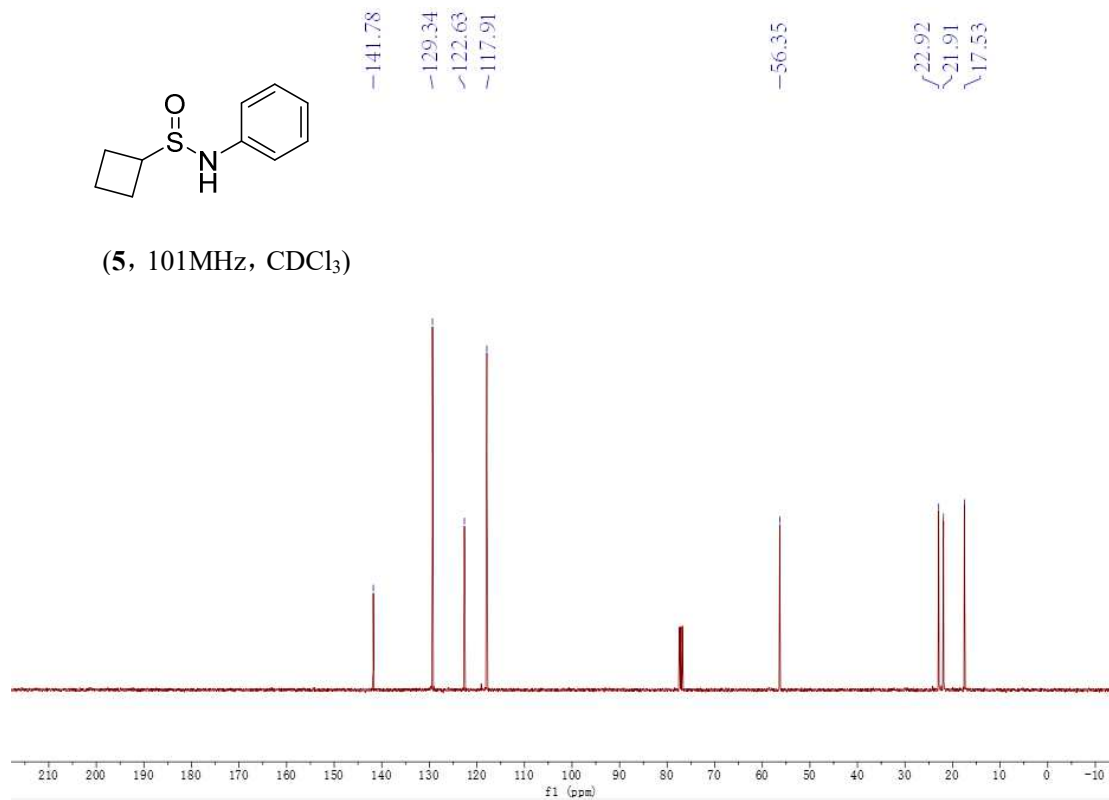



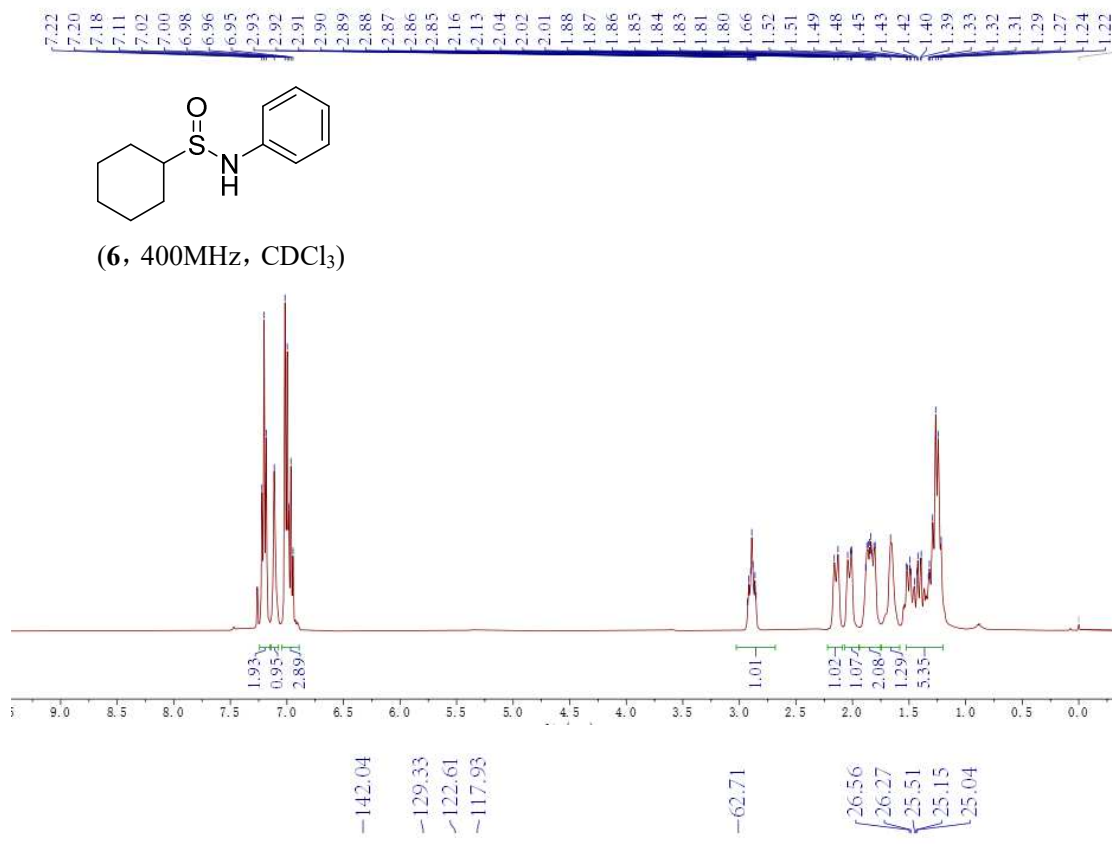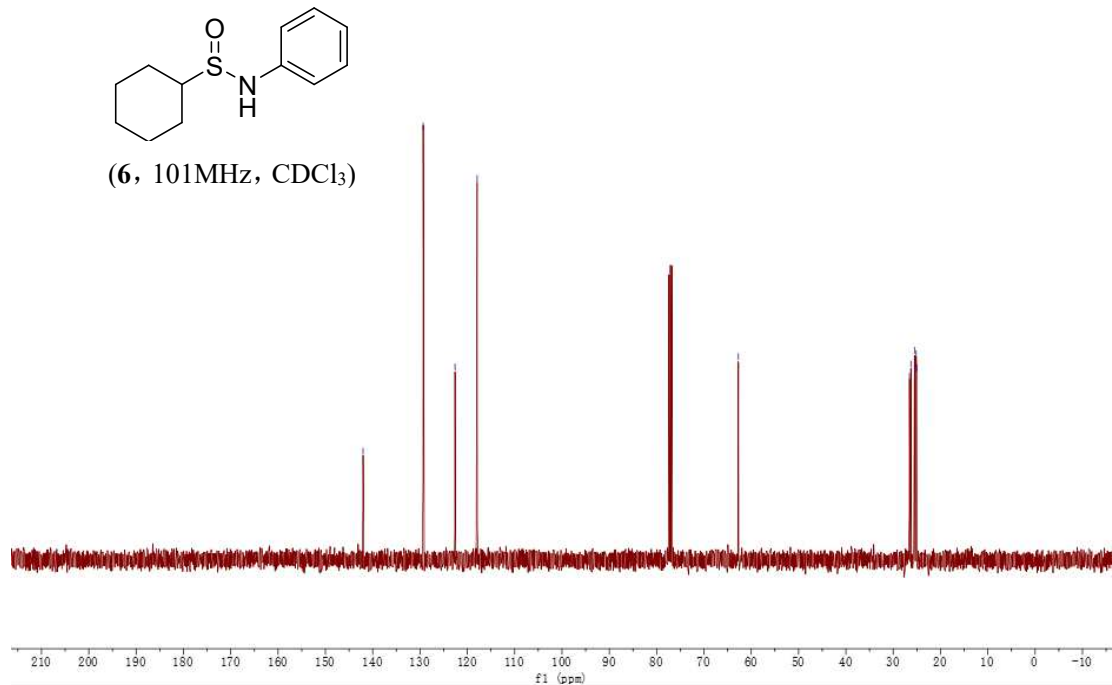

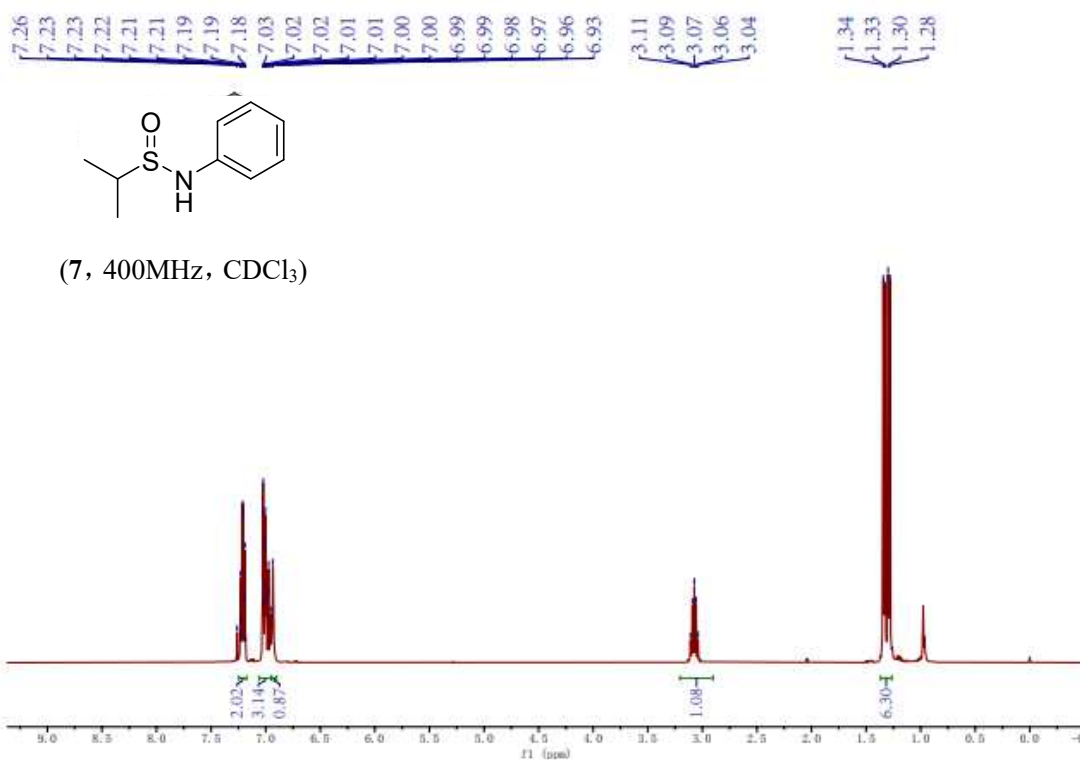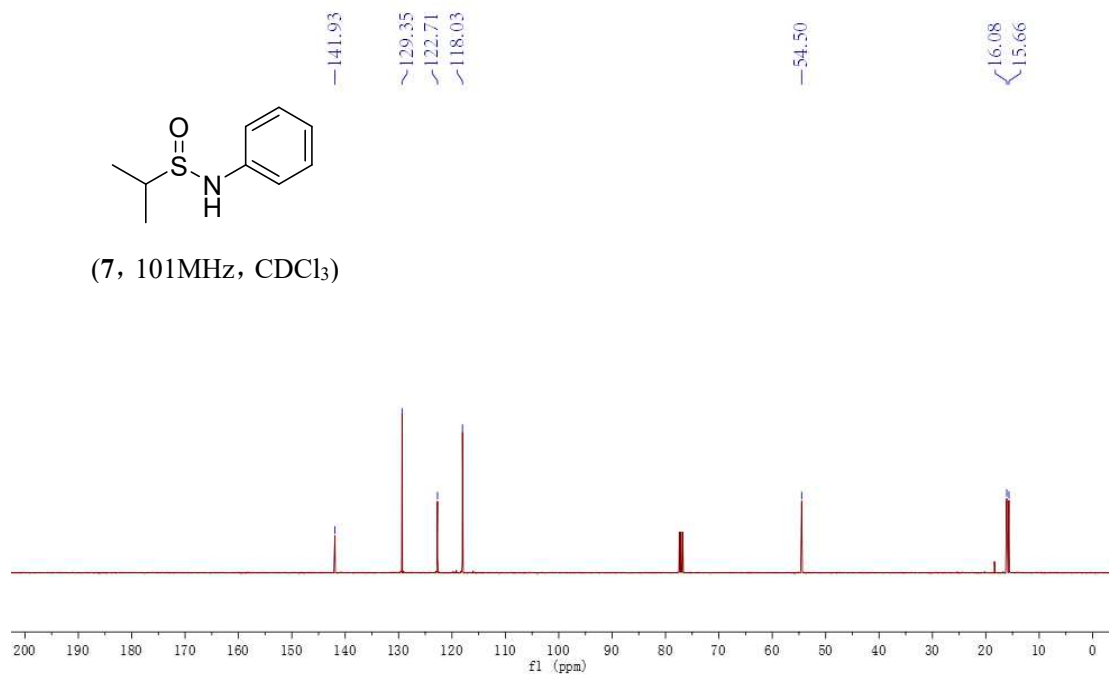

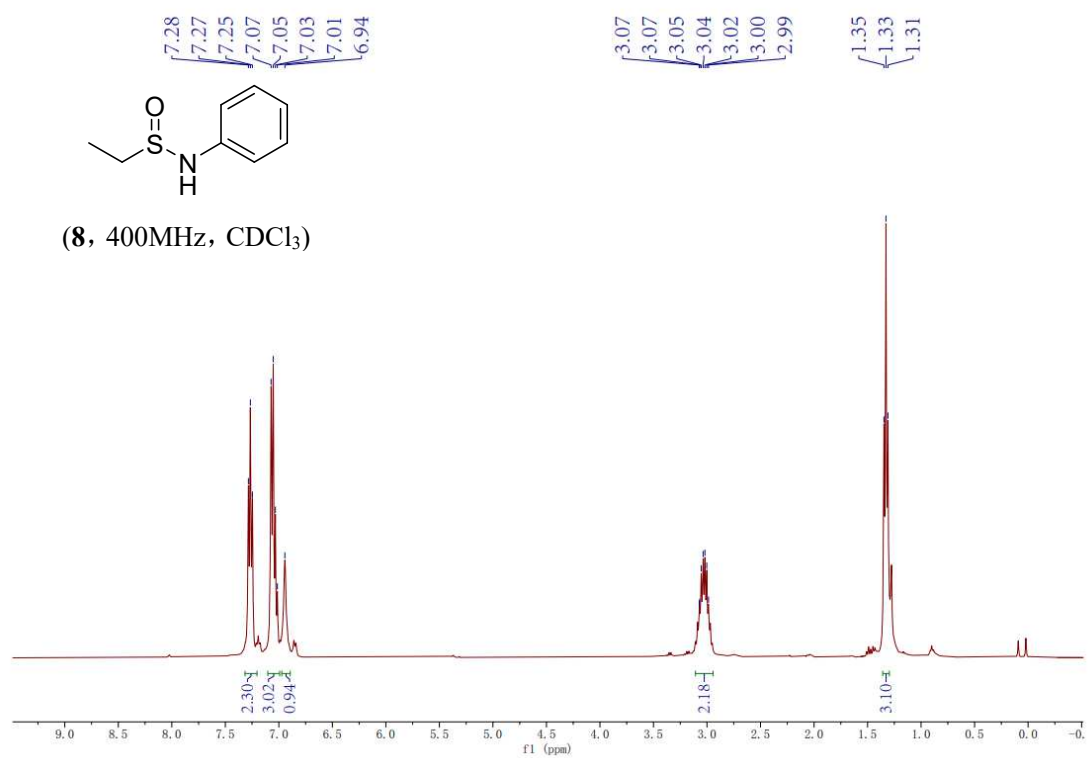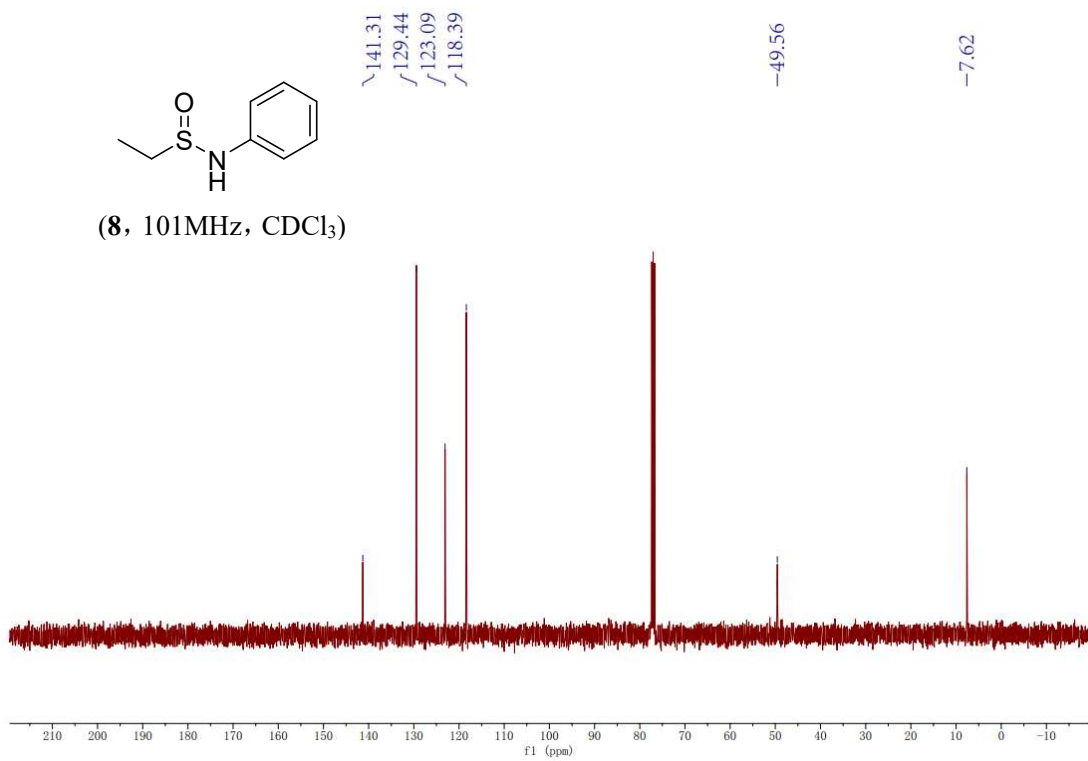

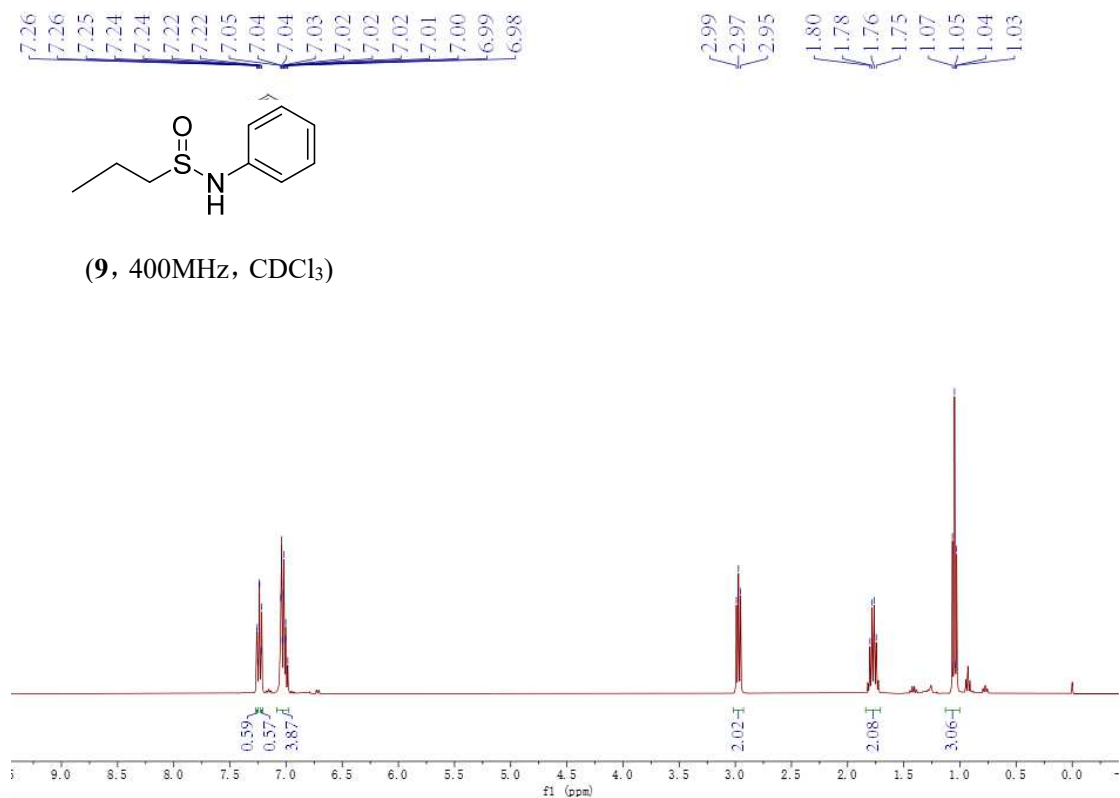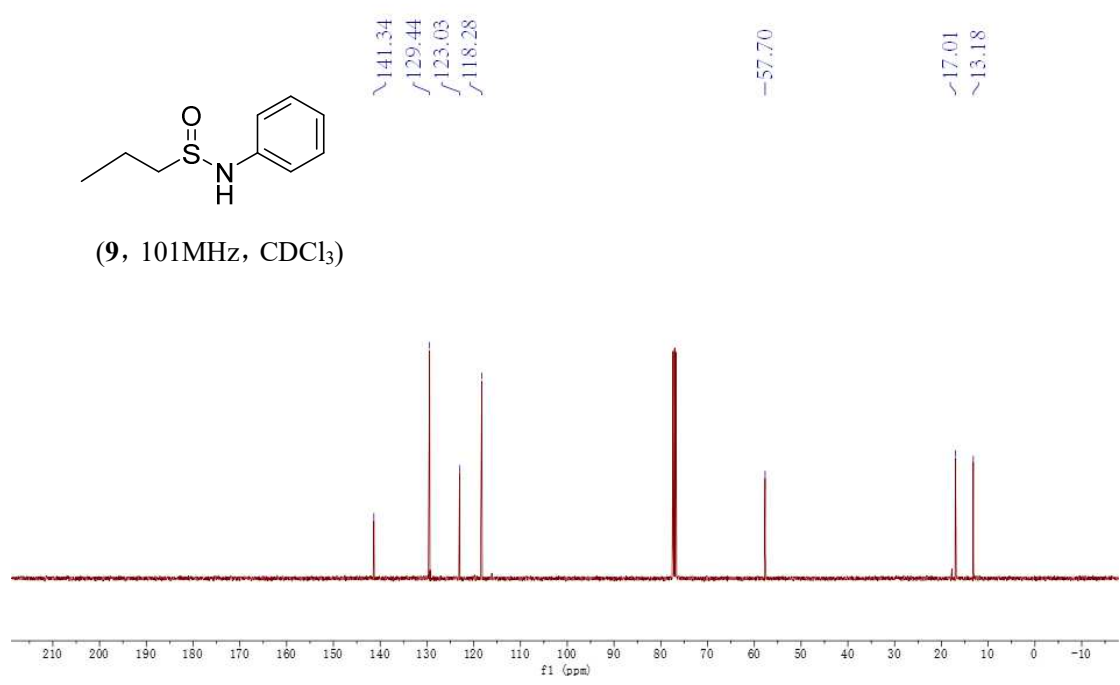

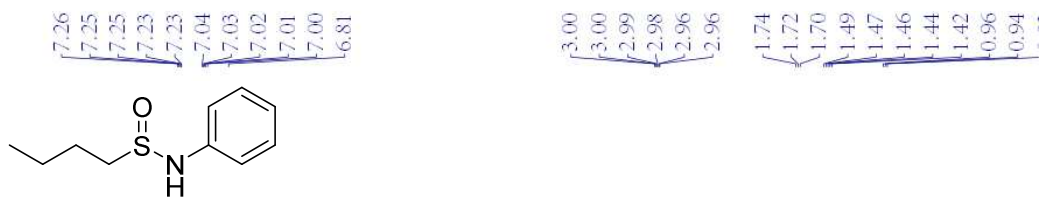

(10, 400MHz, CDCl<sub>3</sub>)

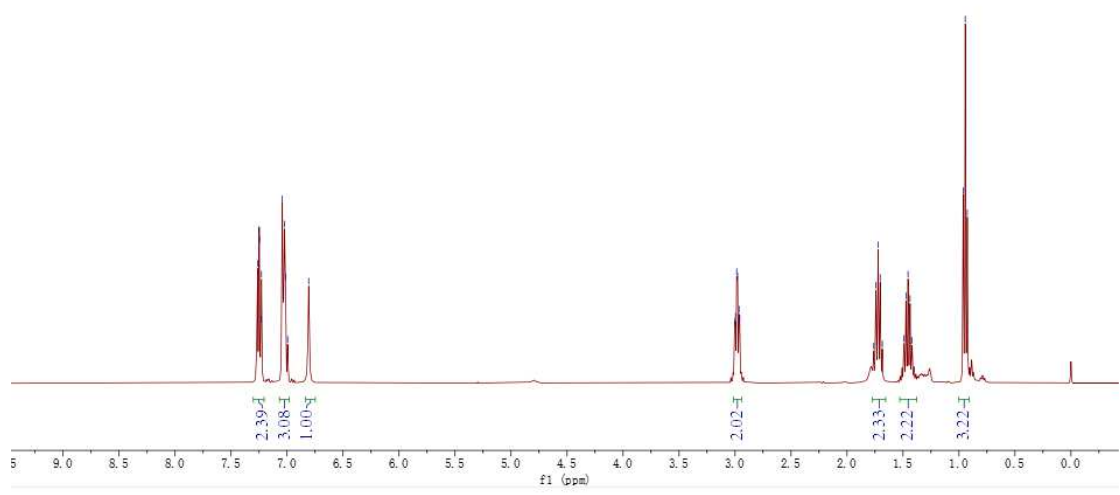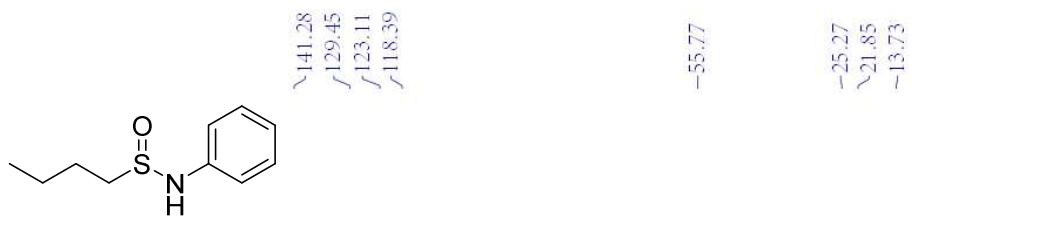

(10, 101MHz, CDCl<sub>3</sub>)

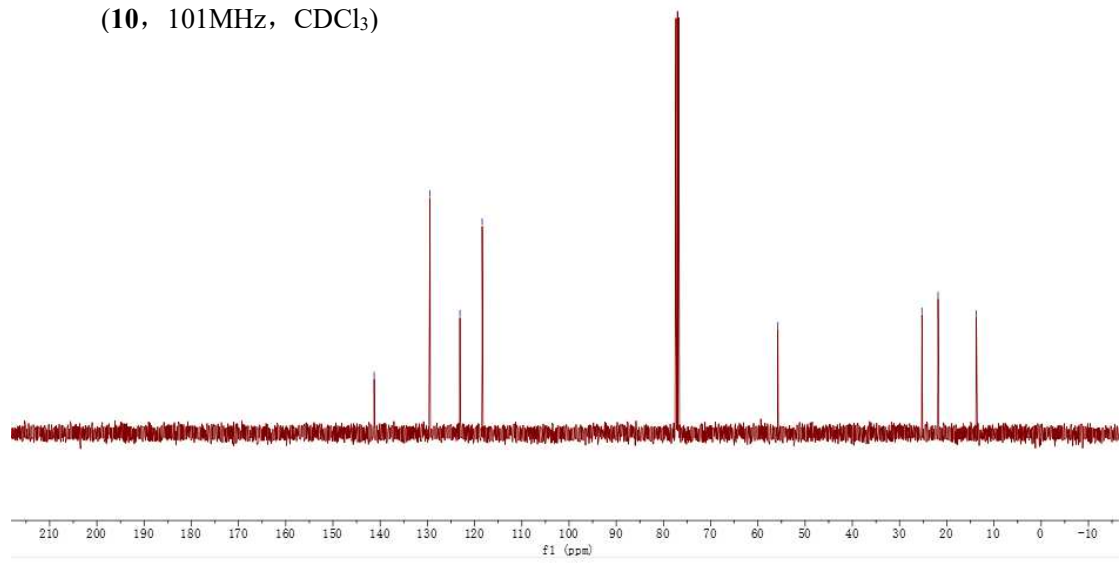

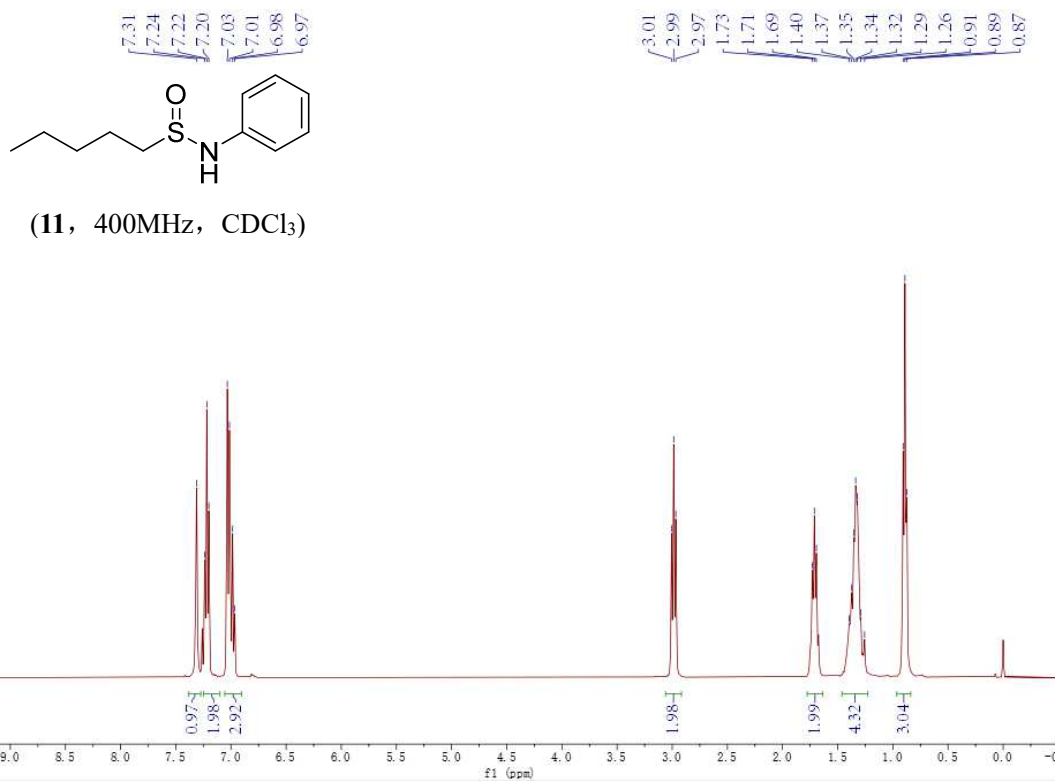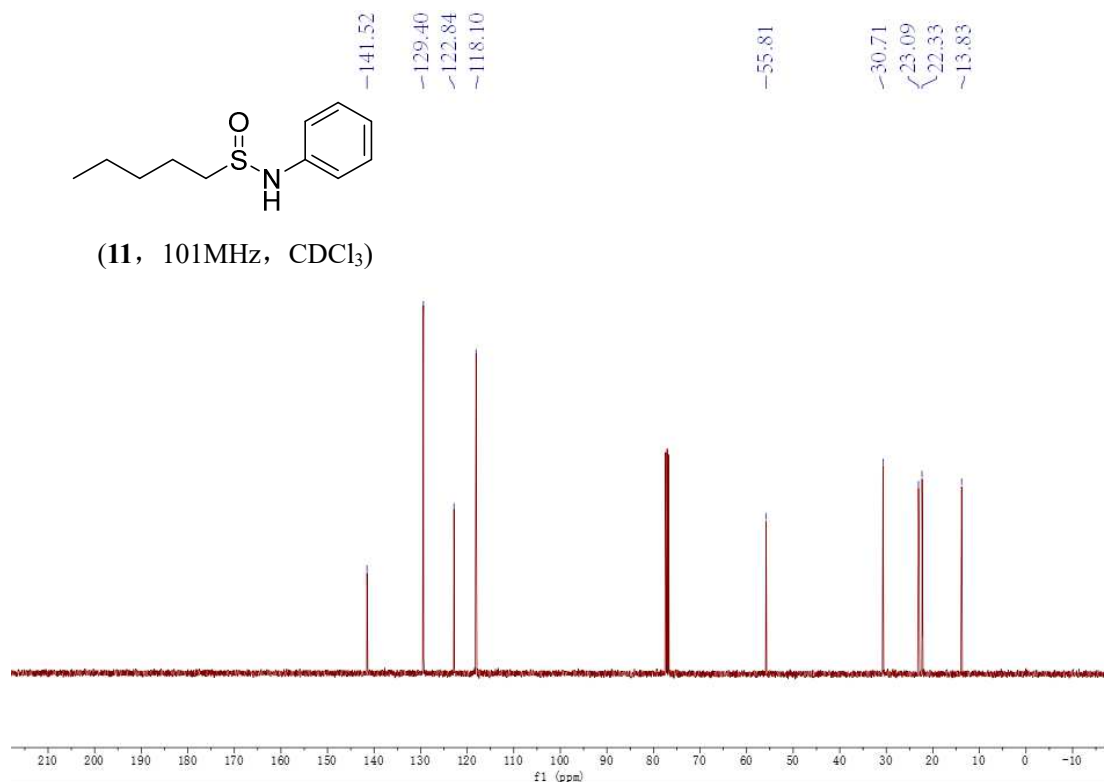

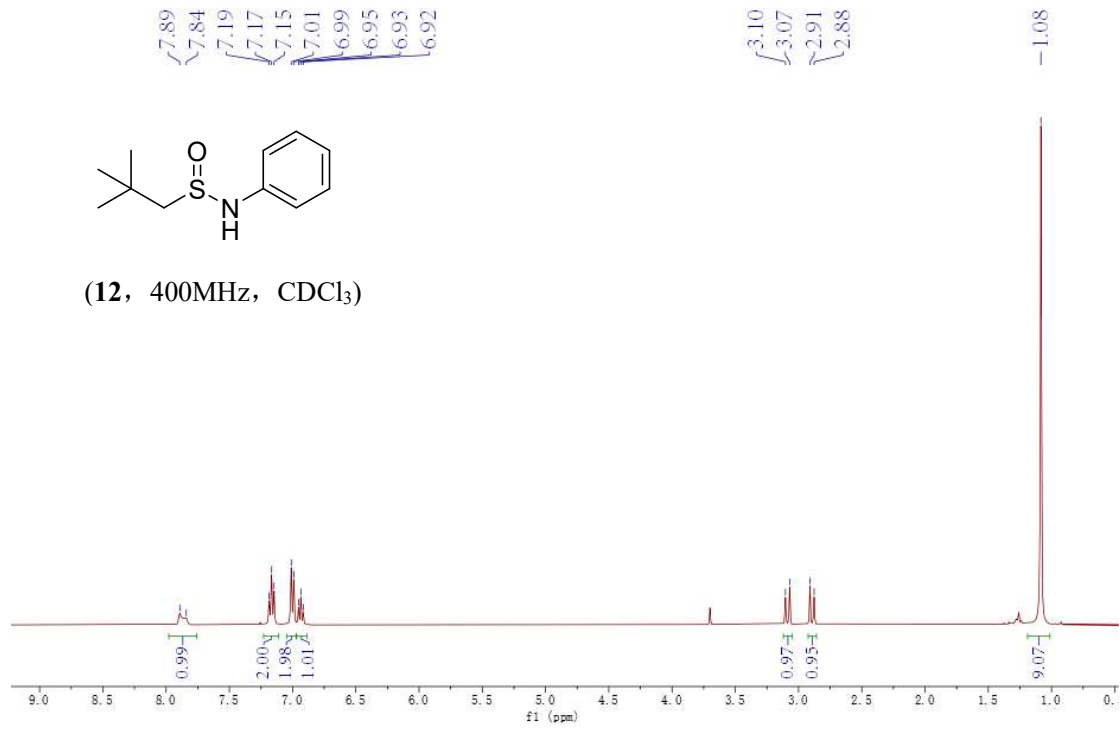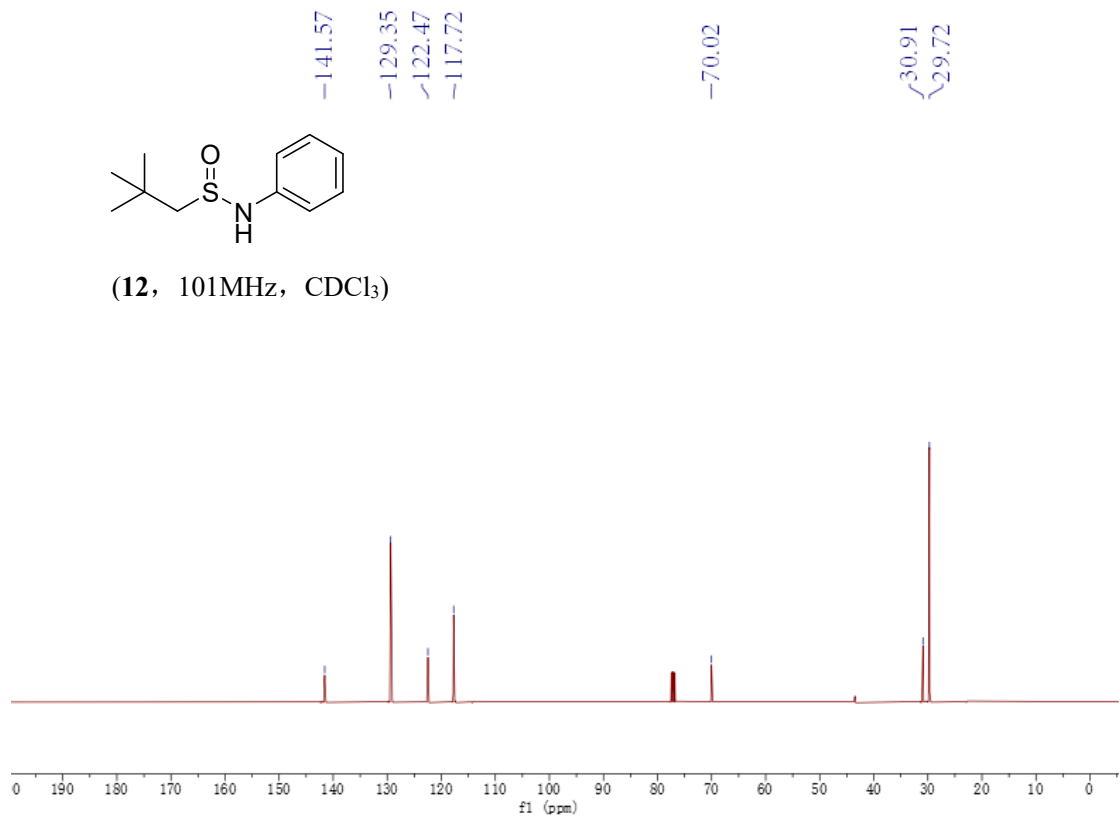

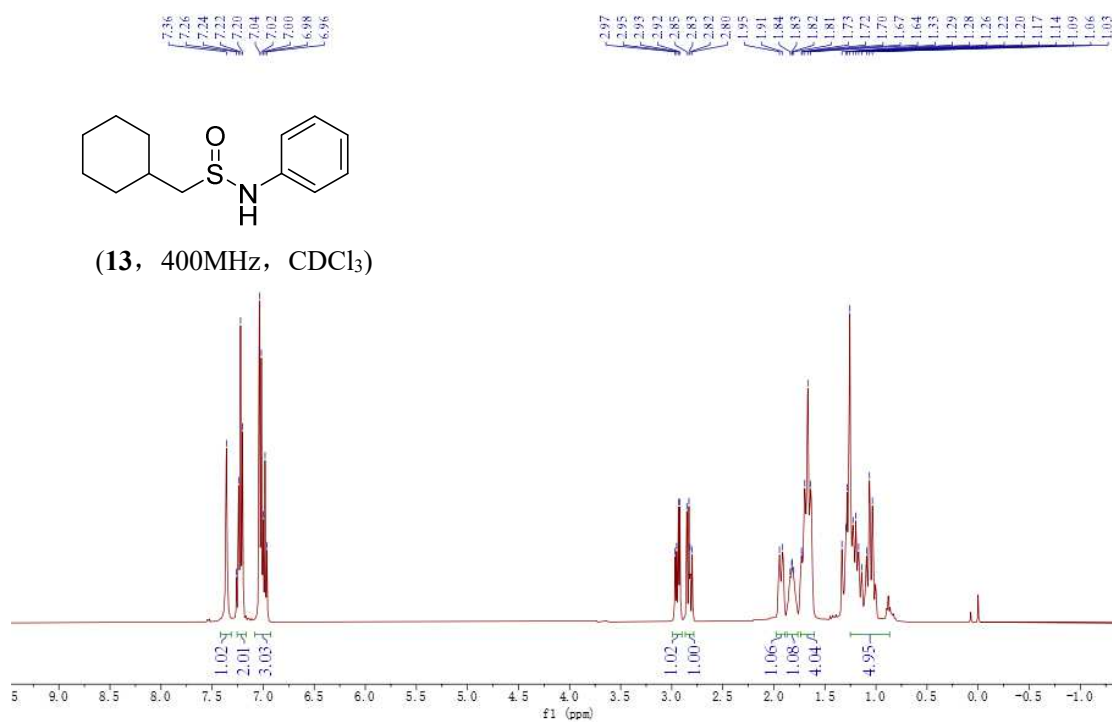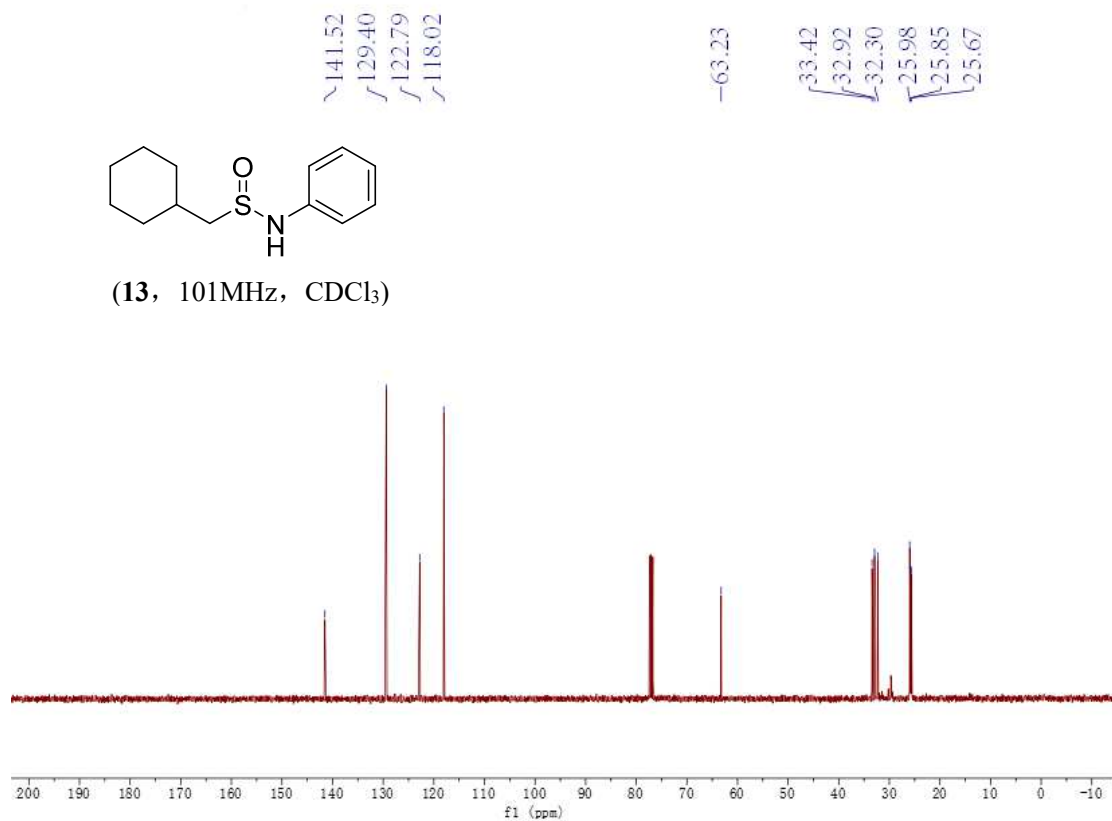



7.40  
7.39  
7.26  
7.24  
7.22  
7.05  
7.03  
7.01  
6.98  
6.96  
6.36

4.33  
4.30  
4.17  
4.14

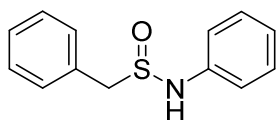

(14, 400MHz, CDCl<sub>3</sub>)

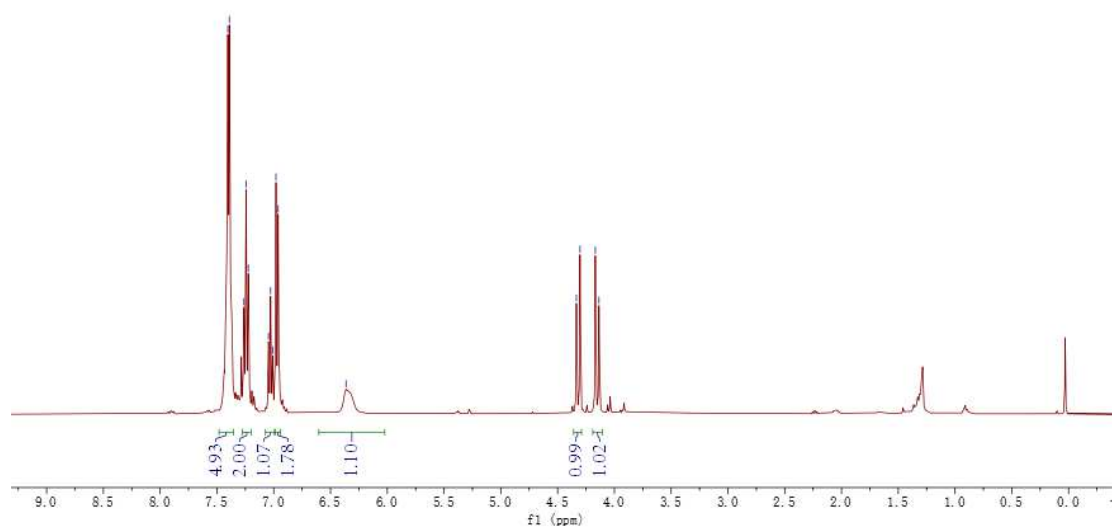

140.91  
130.67  
129.44  
128.97  
128.72  
128.57  
123.34  
118.82

-61.28

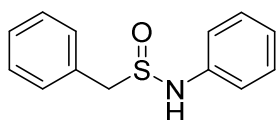

(14, 101MHz, CDCl<sub>3</sub>)

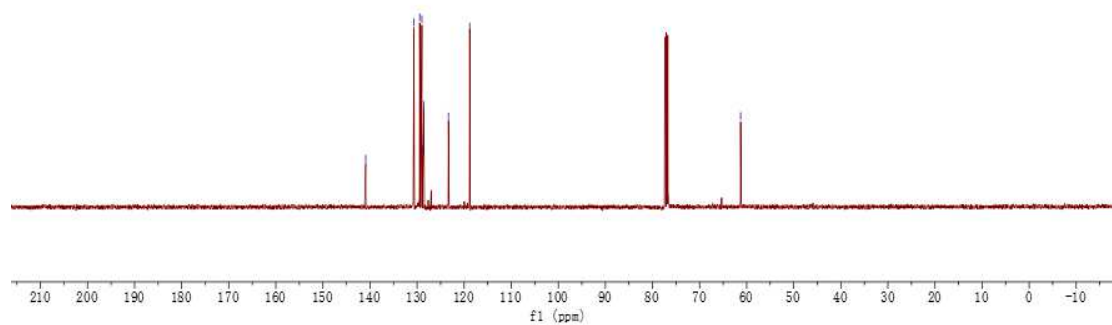

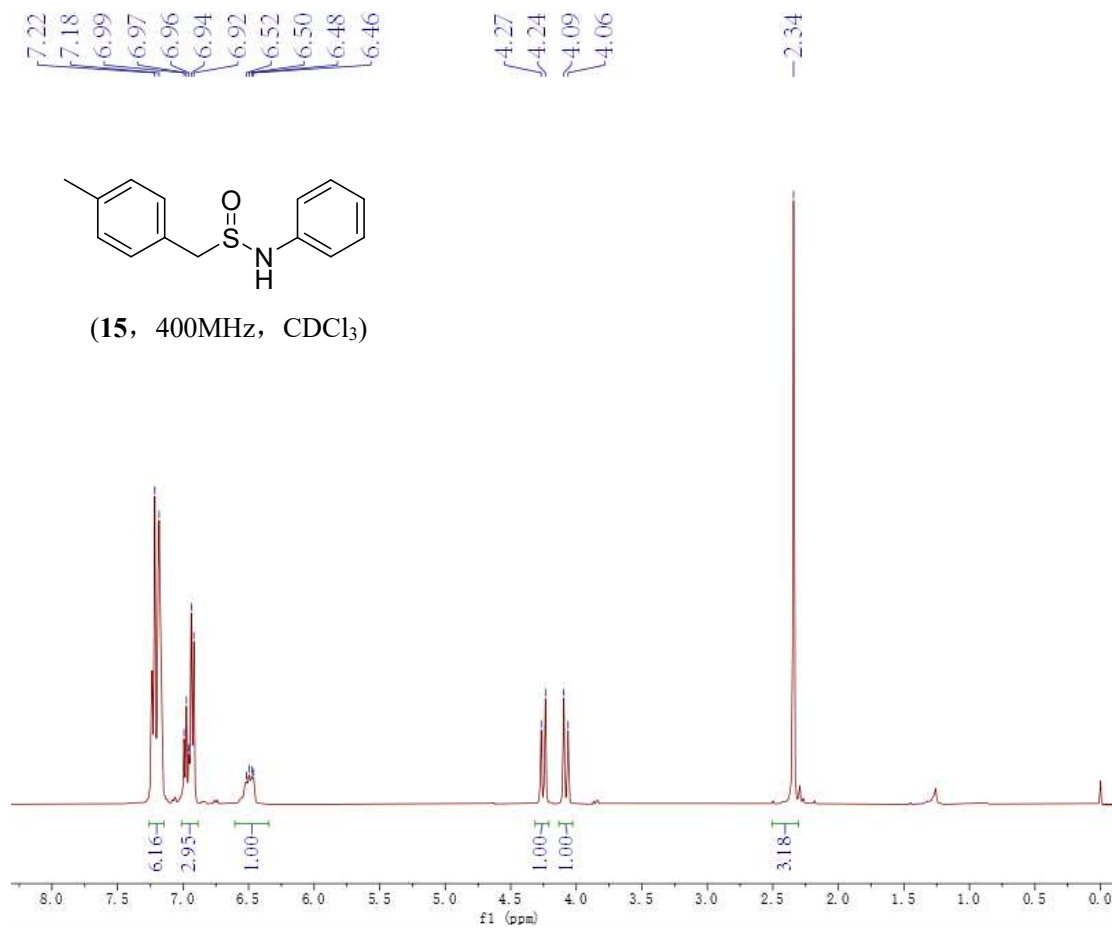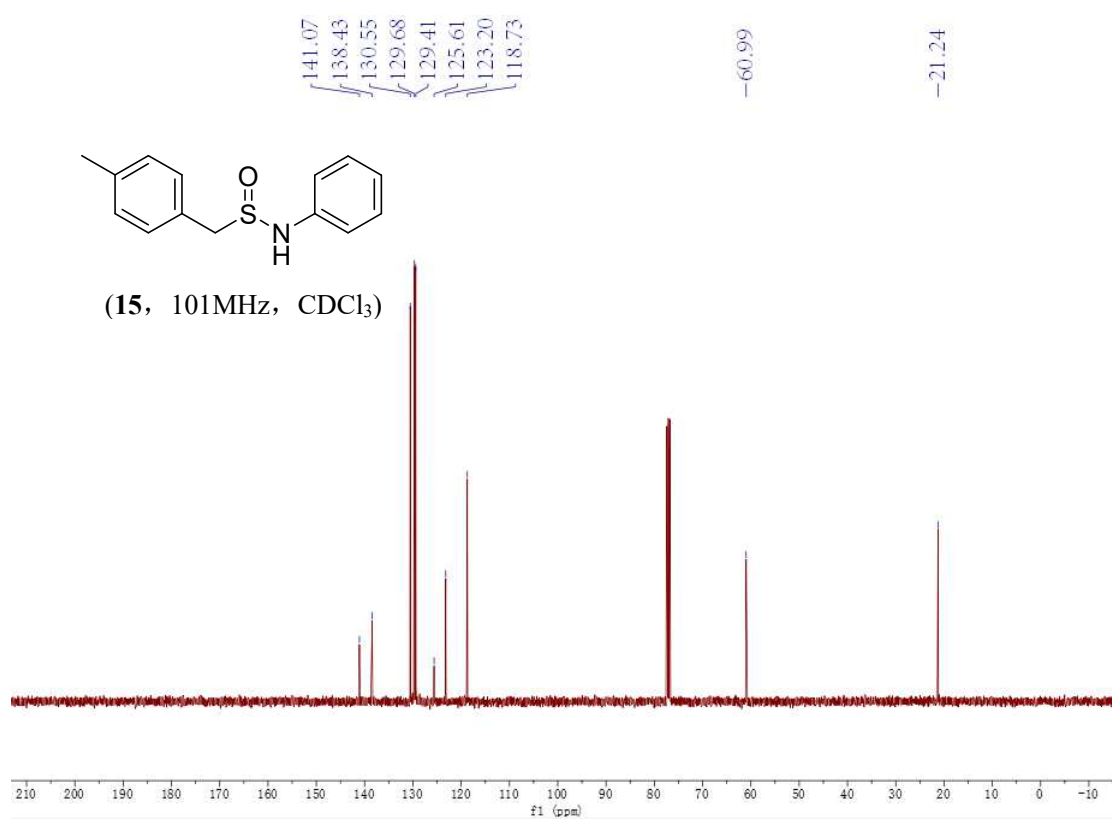

7.29  
7.29  
7.28  
7.27  
7.27  
7.26  
7.25  
7.06  
7.05  
7.05  
7.04  
7.03  
7.03  
6.31  
6.02  
6.02  
6.01  
6.00  
6.00  
5.99  
5.98  
5.97  
5.97  
5.96  
5.95  
5.95  
5.93  
5.55  
5.53  
5.47  
5.43  
3.81  
3.80  
3.78  
3.76  
3.58  
3.56  
3.55  
3.53

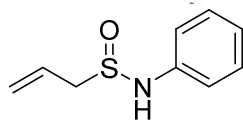

(16, 400MHz, CDCl<sub>3</sub>)

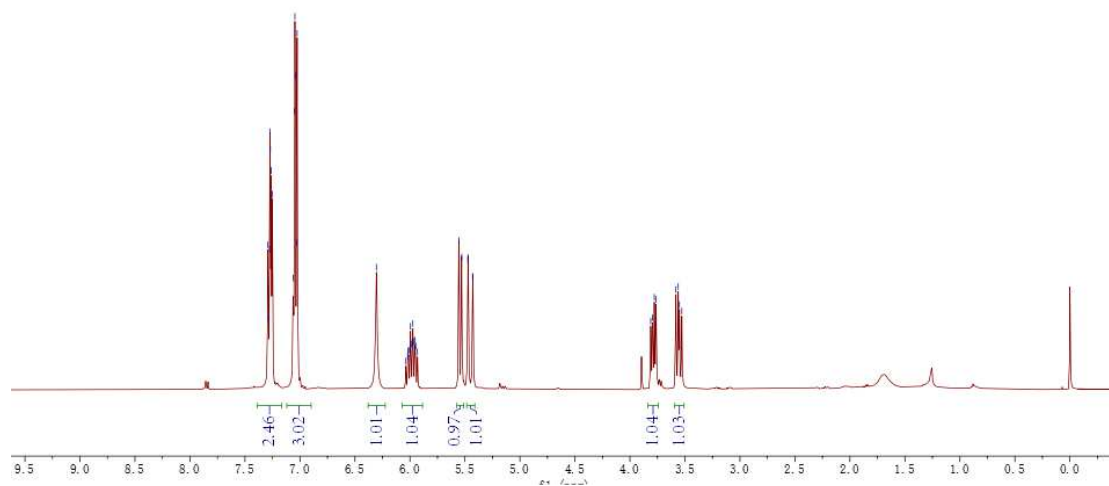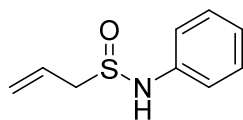

(16, 101MHz, CDCl<sub>3</sub>)

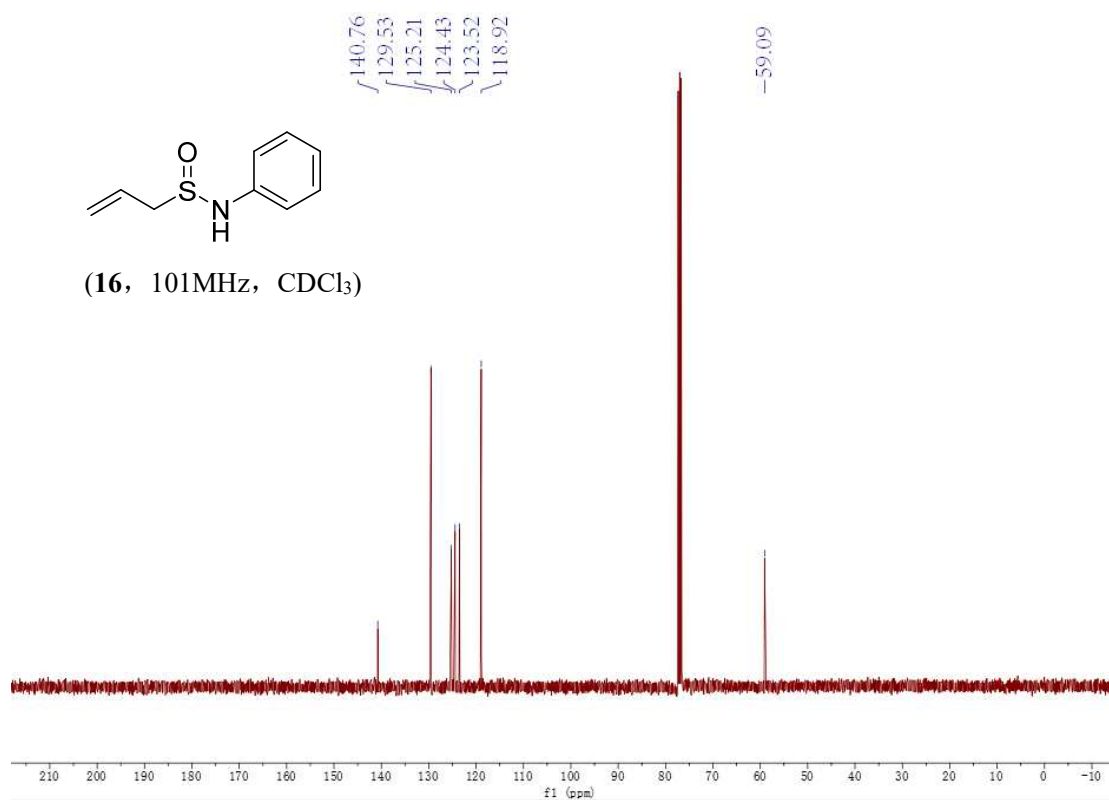

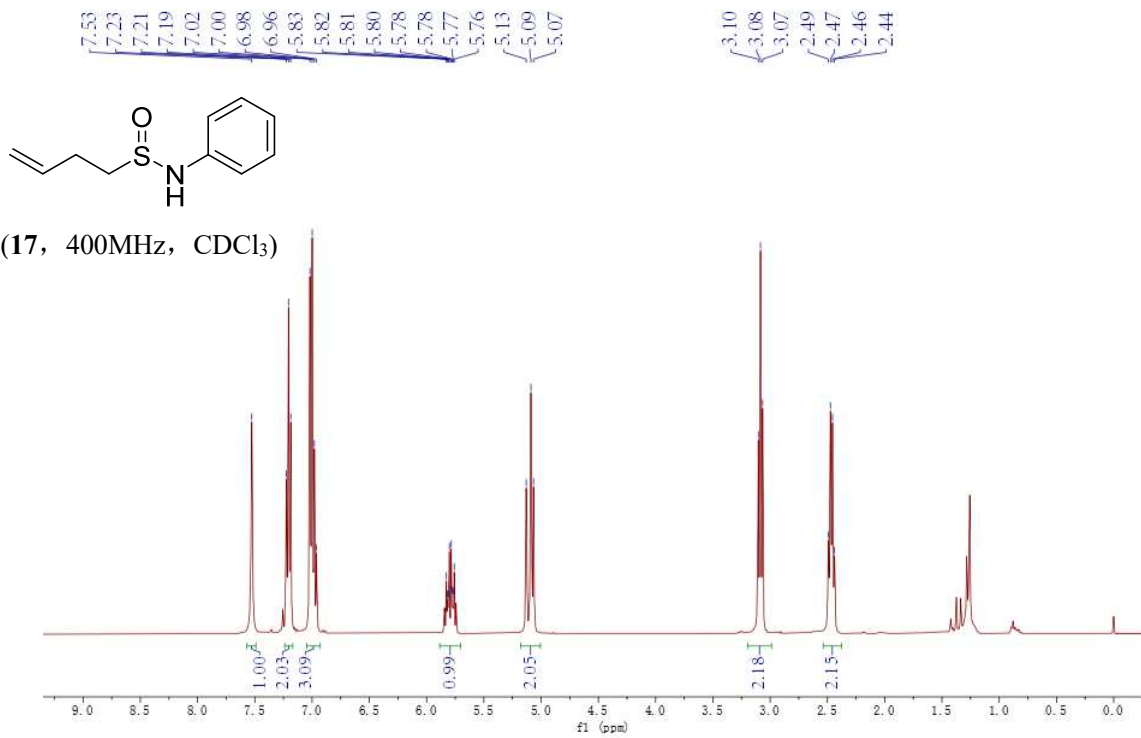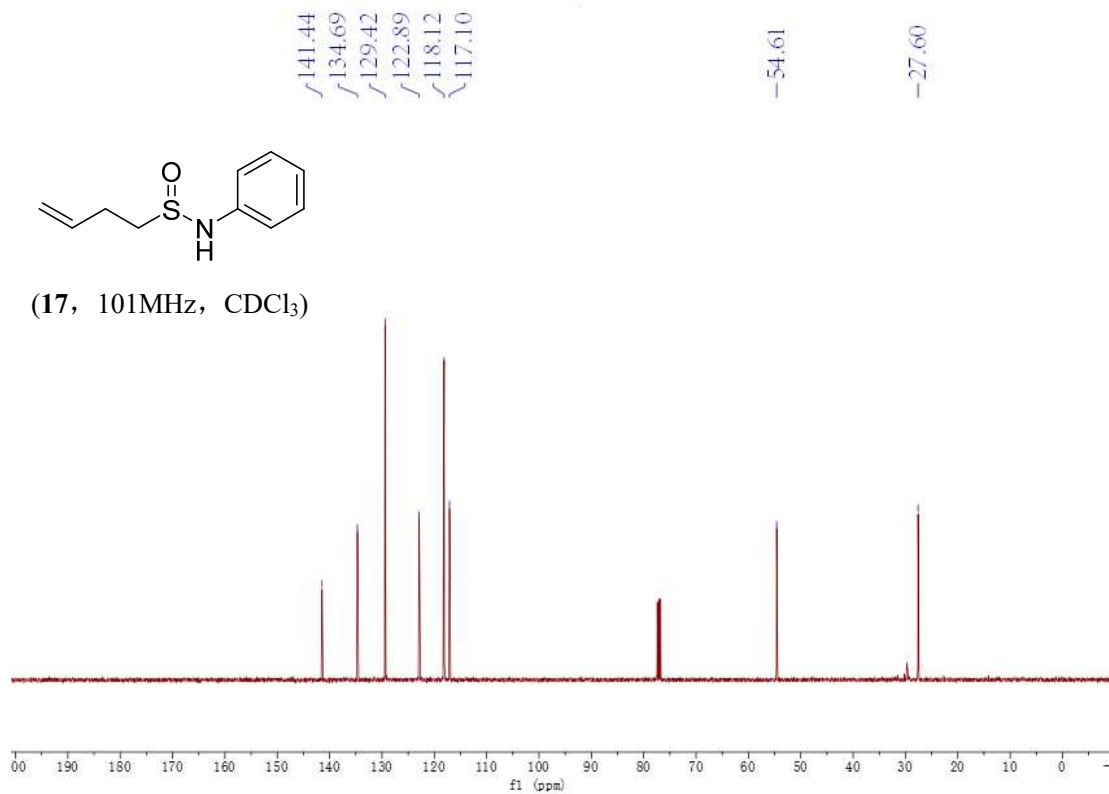

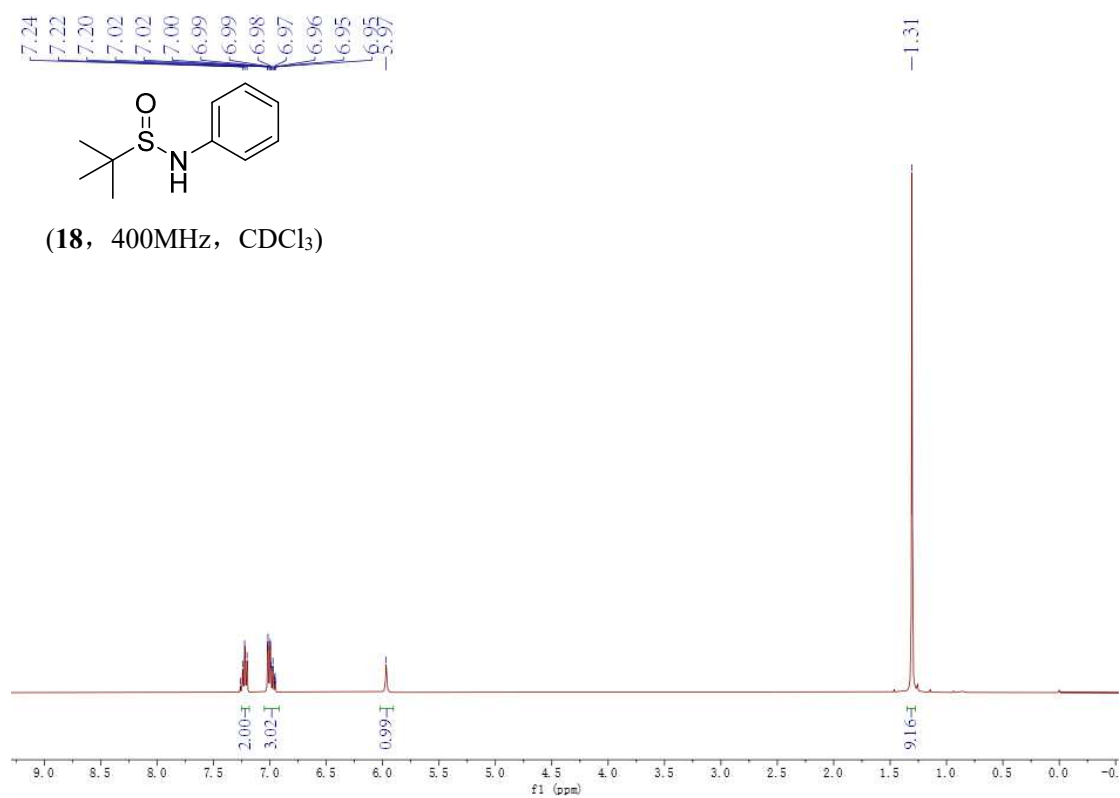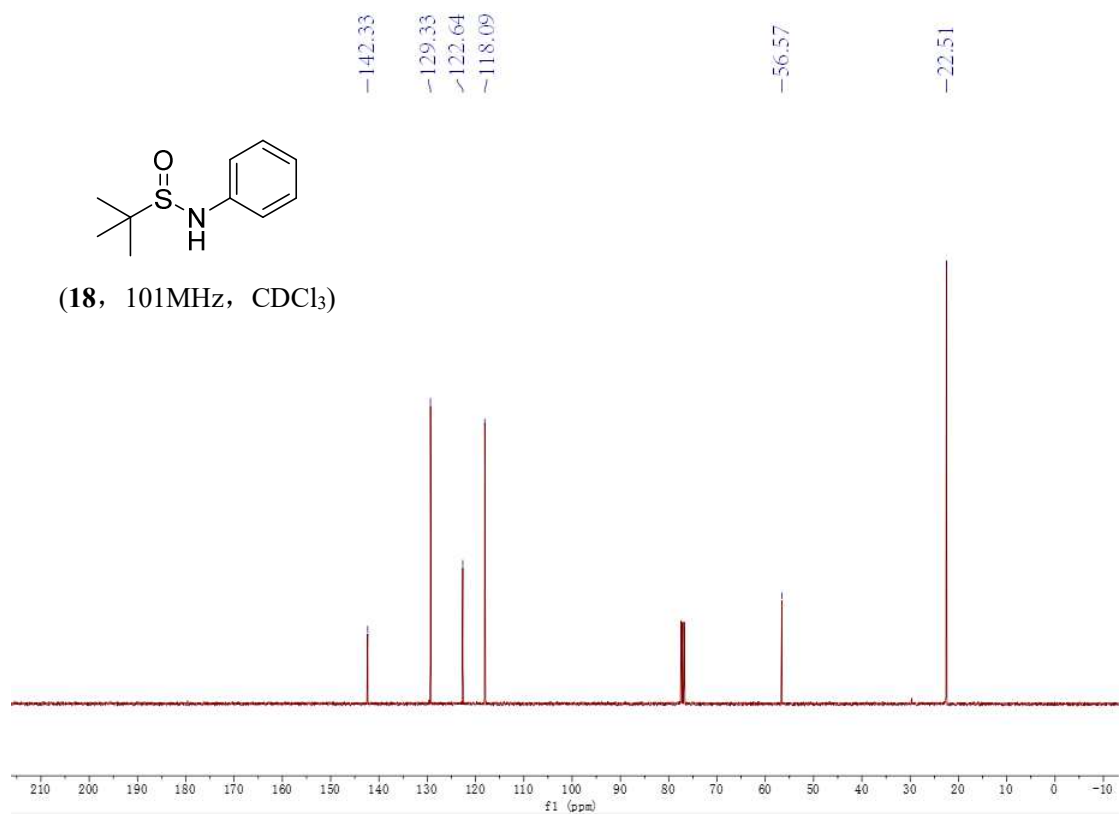

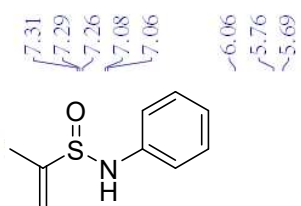

(19, 400MHz, CDCl<sub>3</sub>)

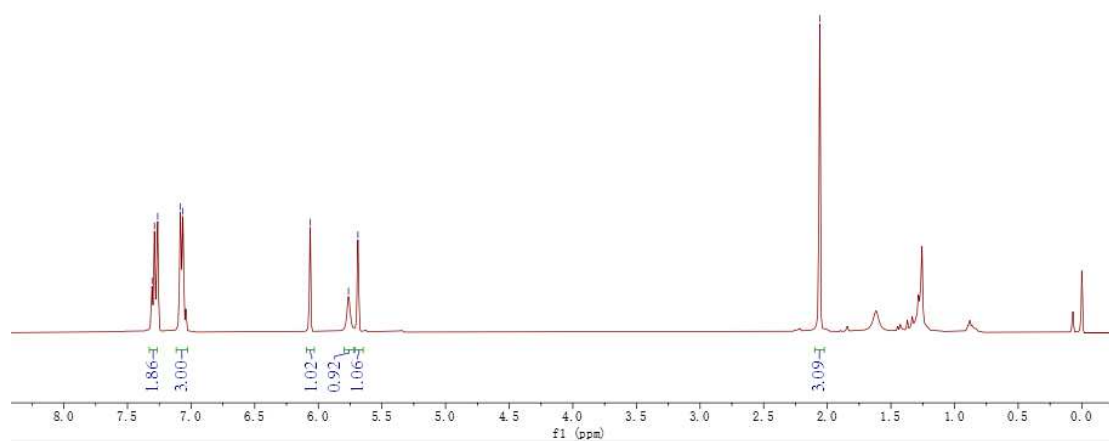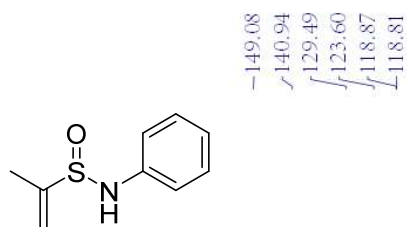

(19, 101MHz, CDCl<sub>3</sub>)

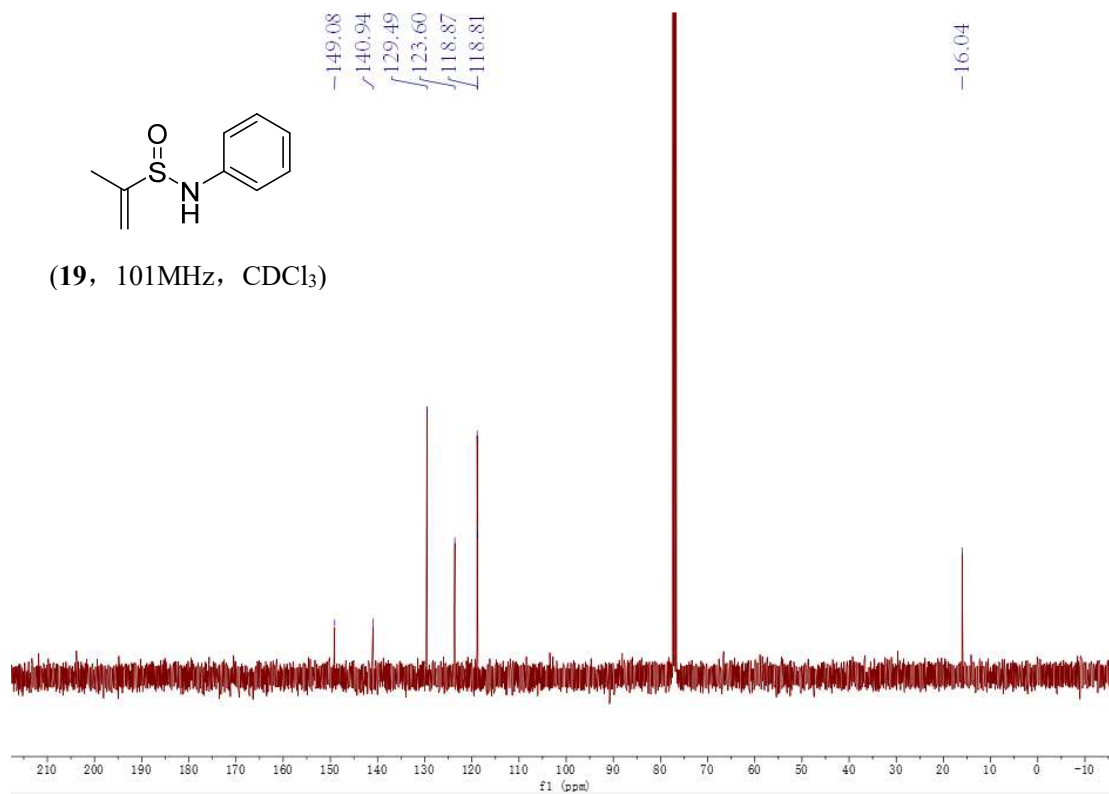

7.81  
7.81  
7.80  
7.79  
7.55  
7.54  
7.53  
7.31  
7.29  
7.28  
7.26  
7.11  
7.09  
6.97

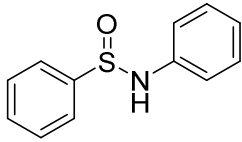

(20, 400MHz, CDCl<sub>3</sub>)

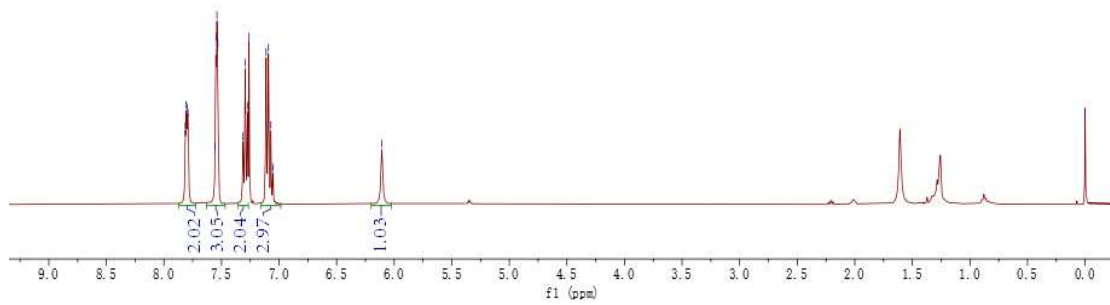

144.61  
140.54  
131.48  
129.54  
129.14  
125.48  
123.78  
118.98

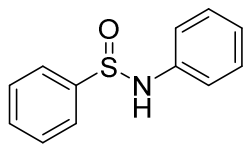

(20, 101MHz, CDCl<sub>3</sub>)

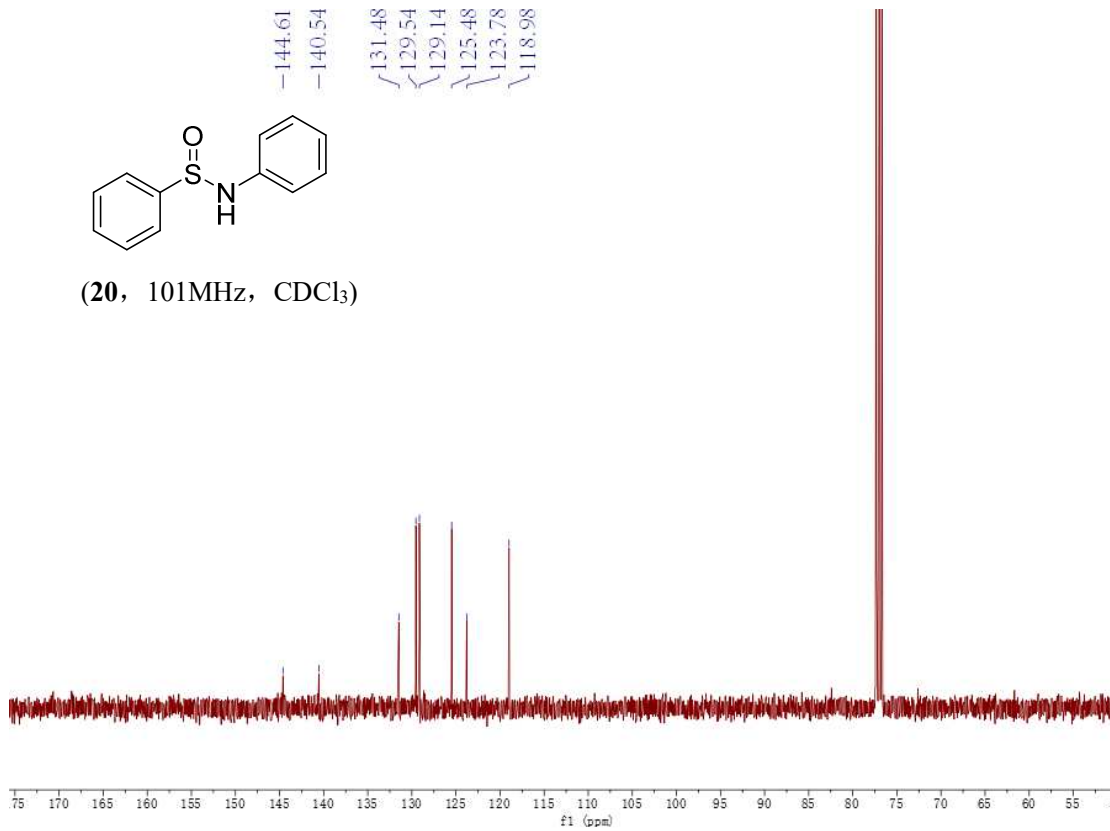

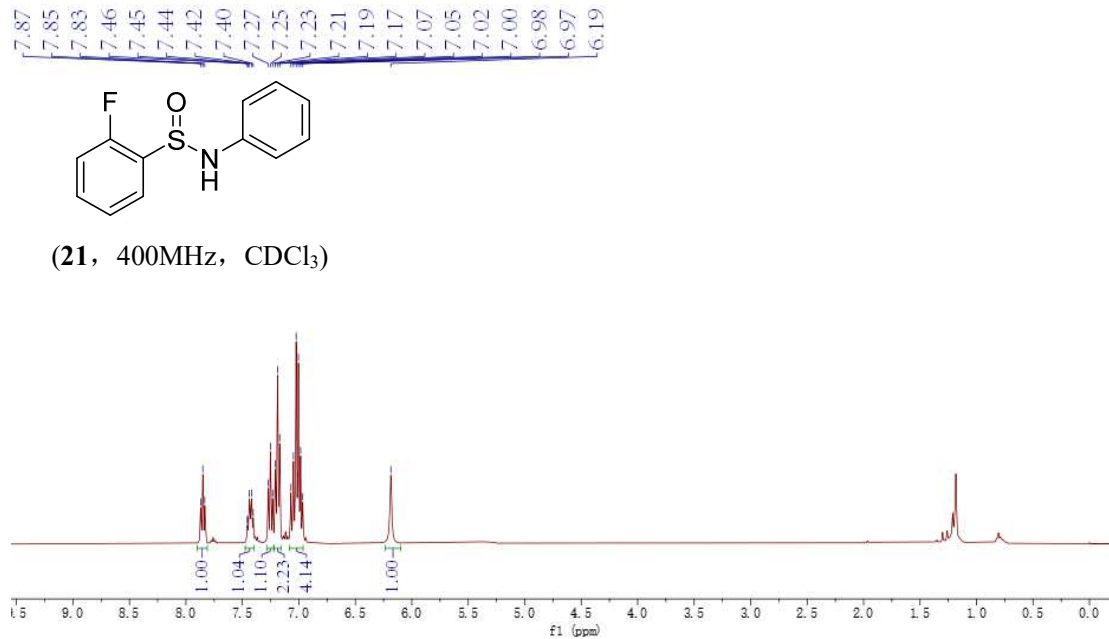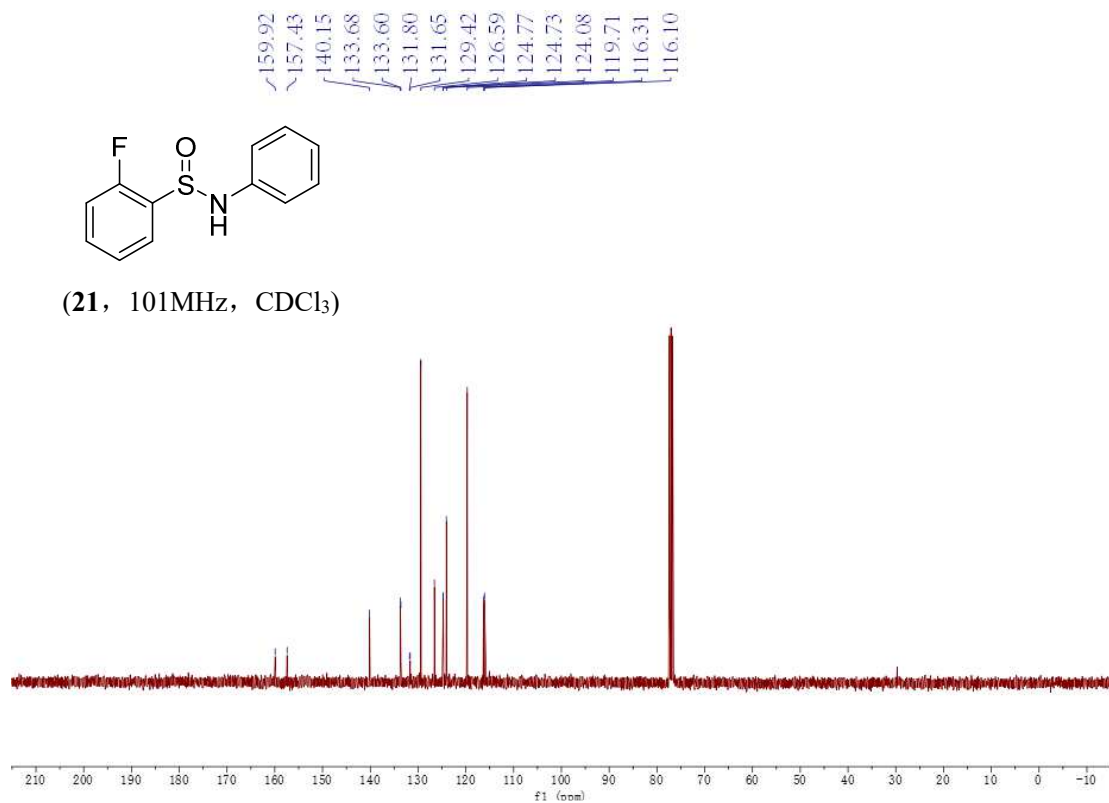



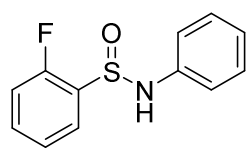

(21, 376MHz, CDCl<sub>3</sub>)

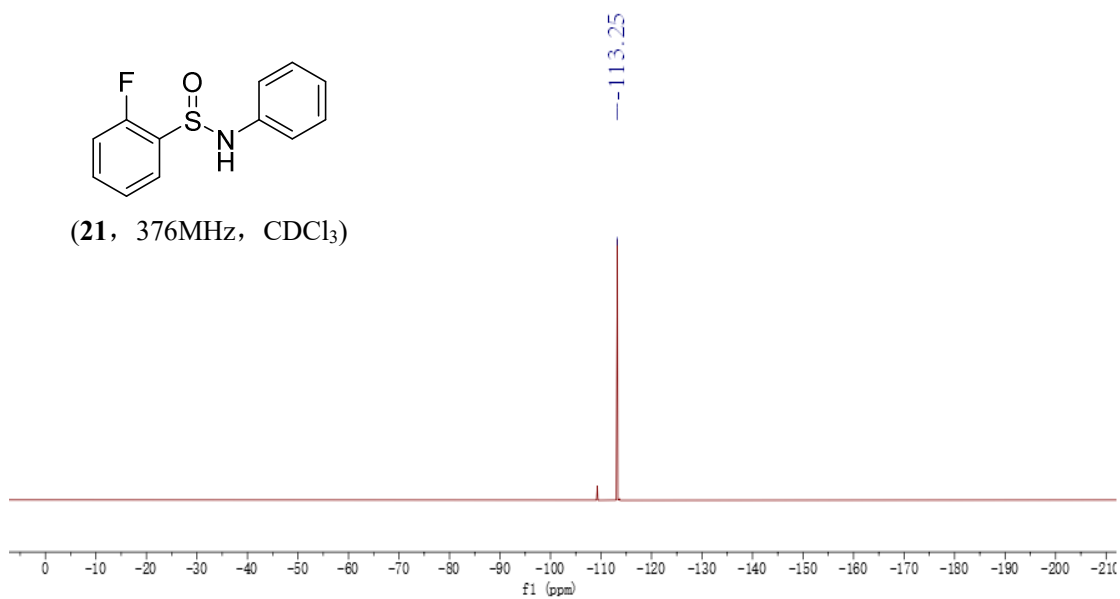

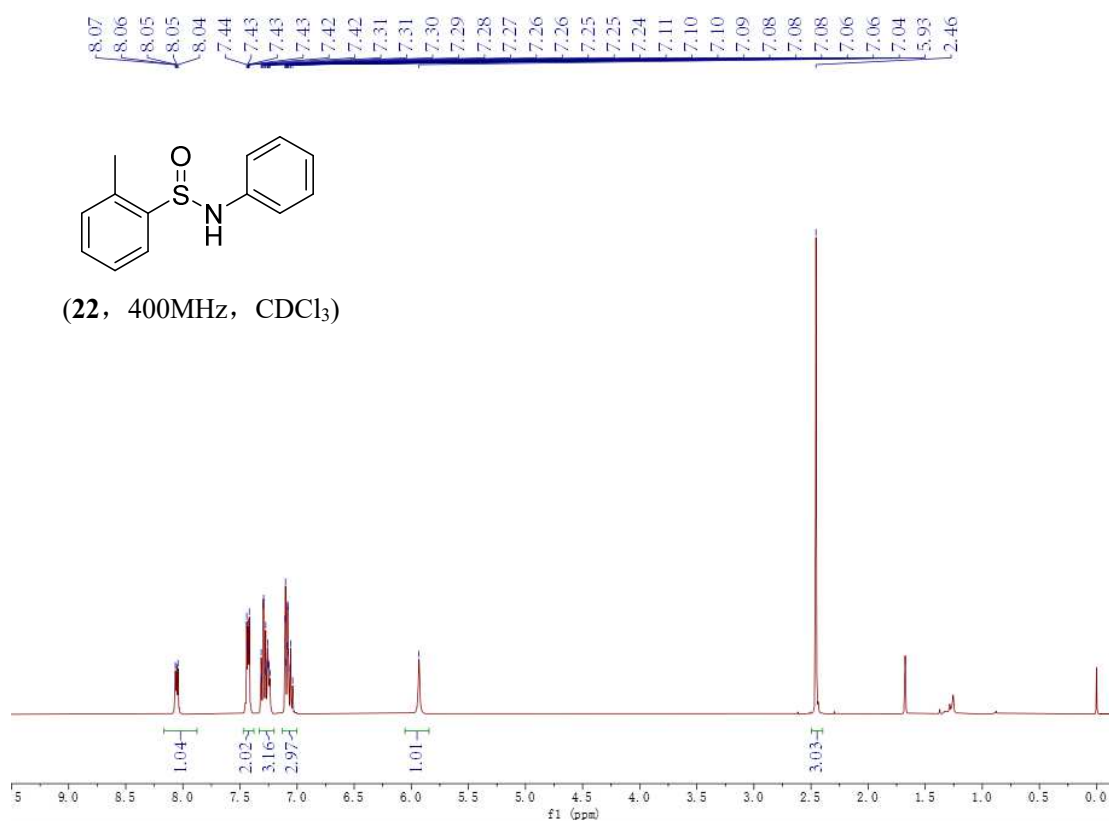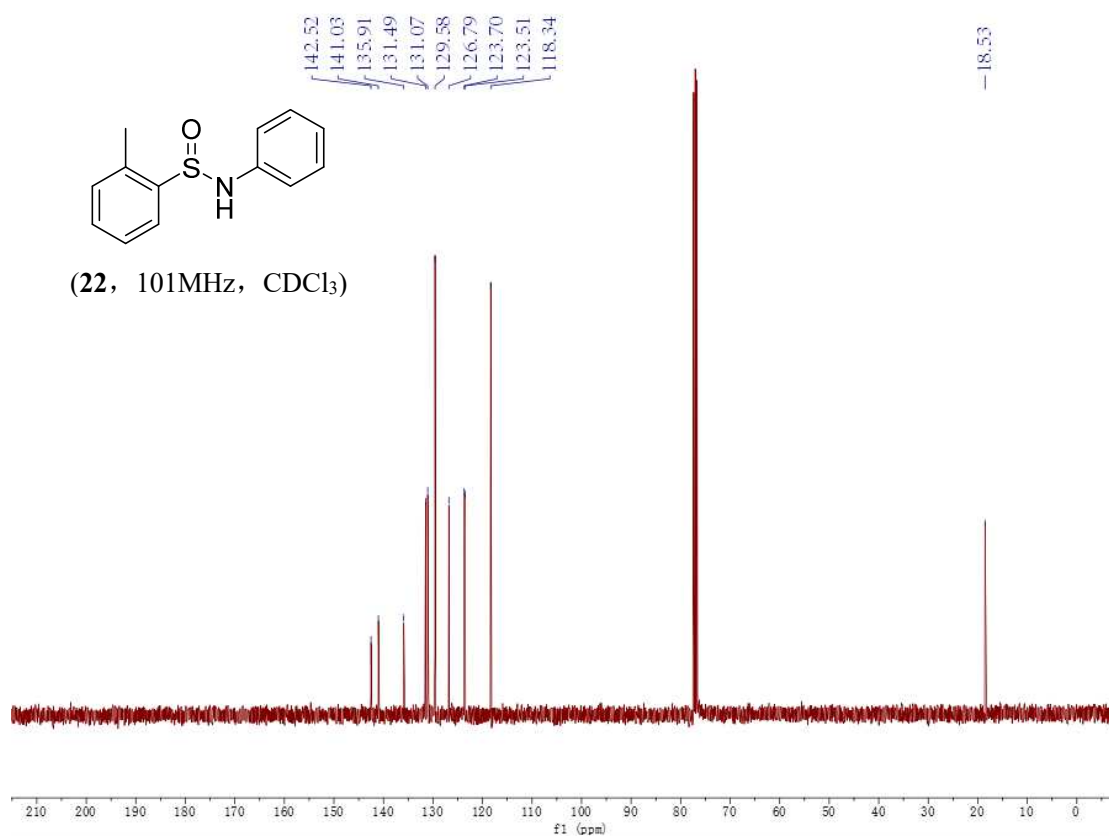

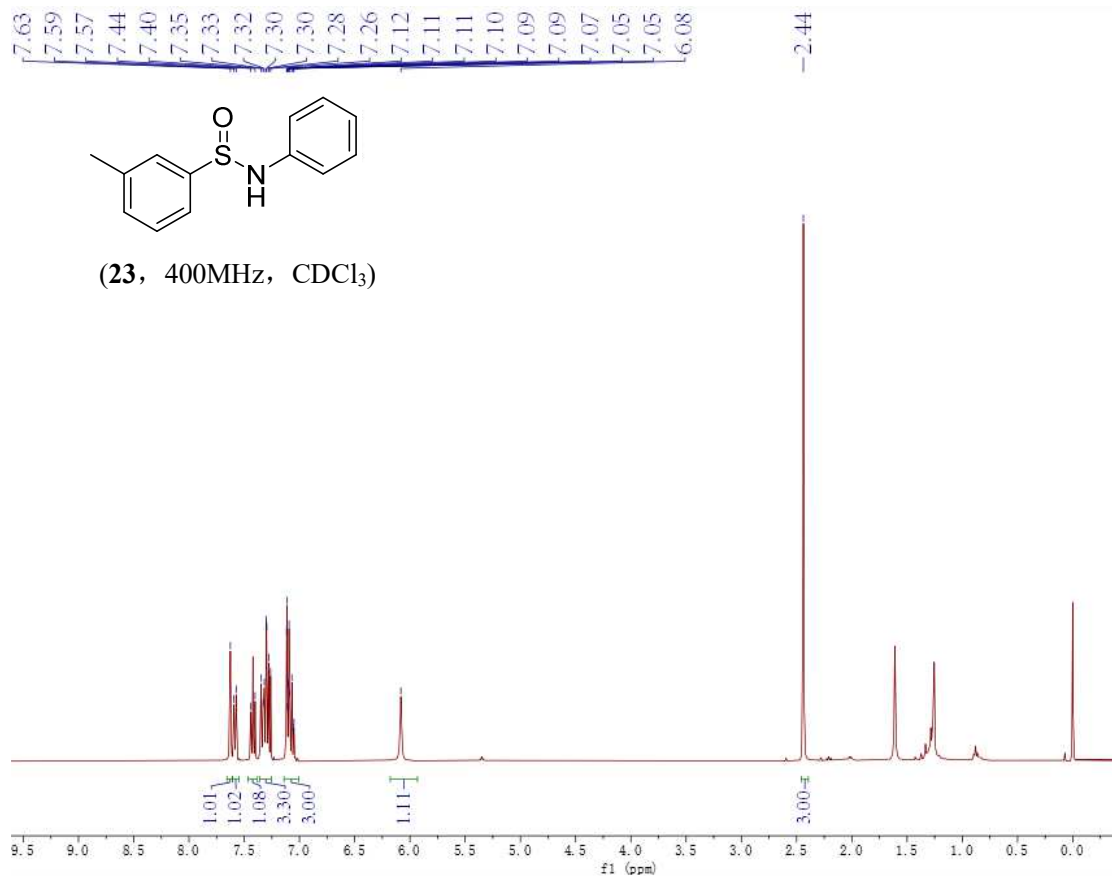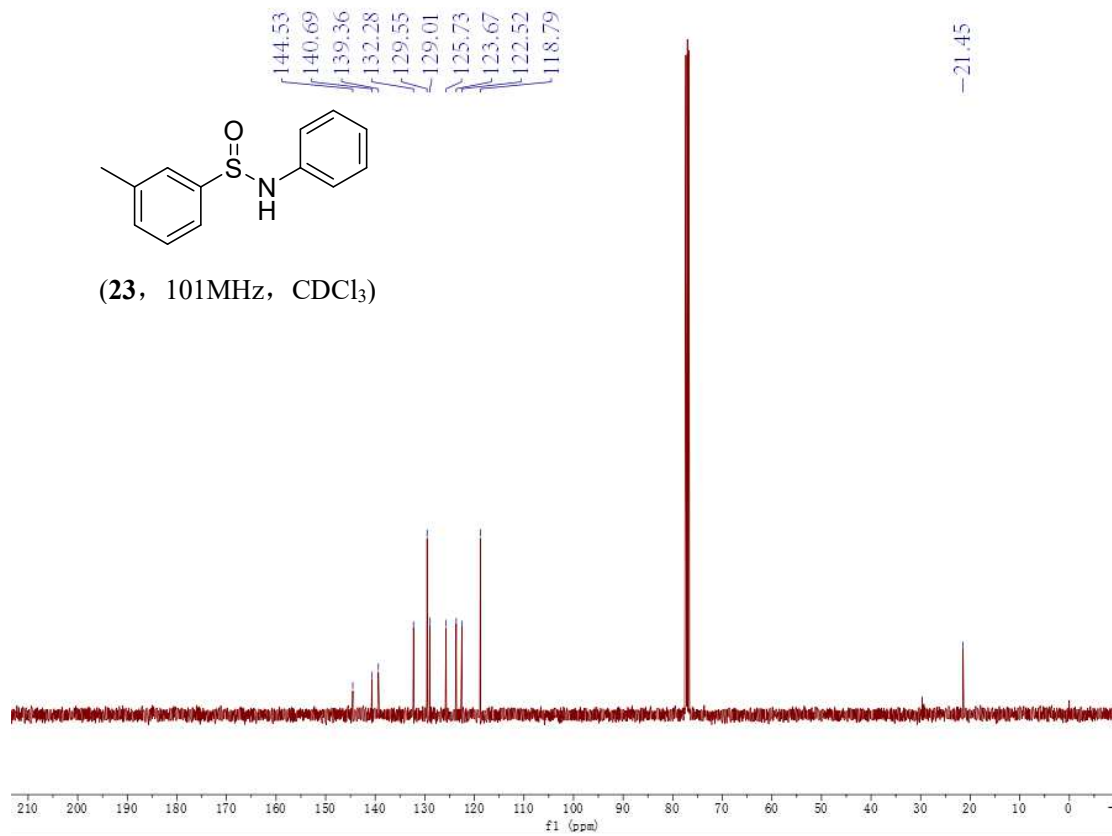

7.55  
7.53  
7.52  
7.51  
7.50  
7.31  
7.29  
7.27  
7.26  
7.22  
7.10  
7.08  
6.30

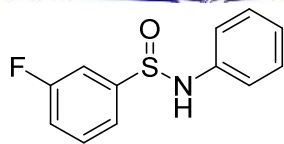

(24, 400MHz, CDCl<sub>3</sub>)

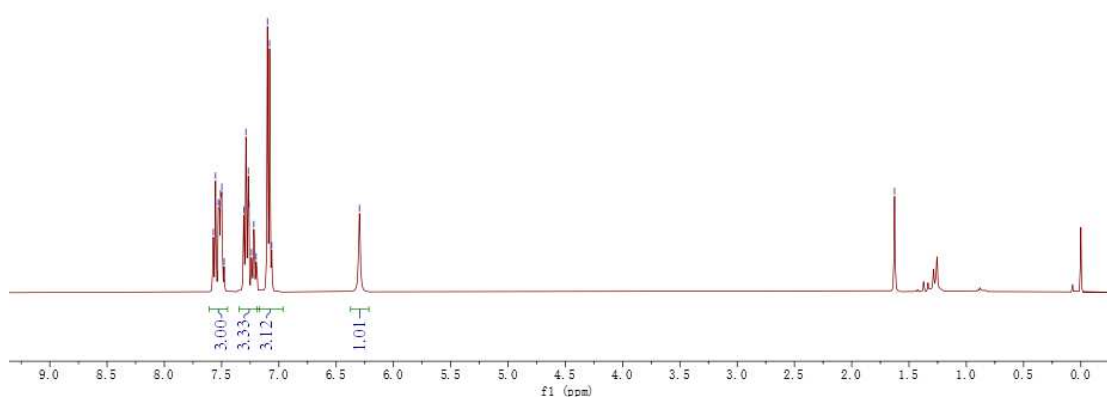

-1.63

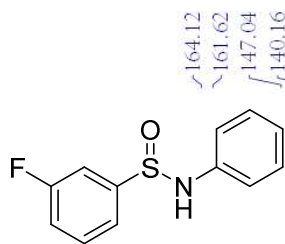

(24, 101 MHz, CDCl<sub>3</sub>)

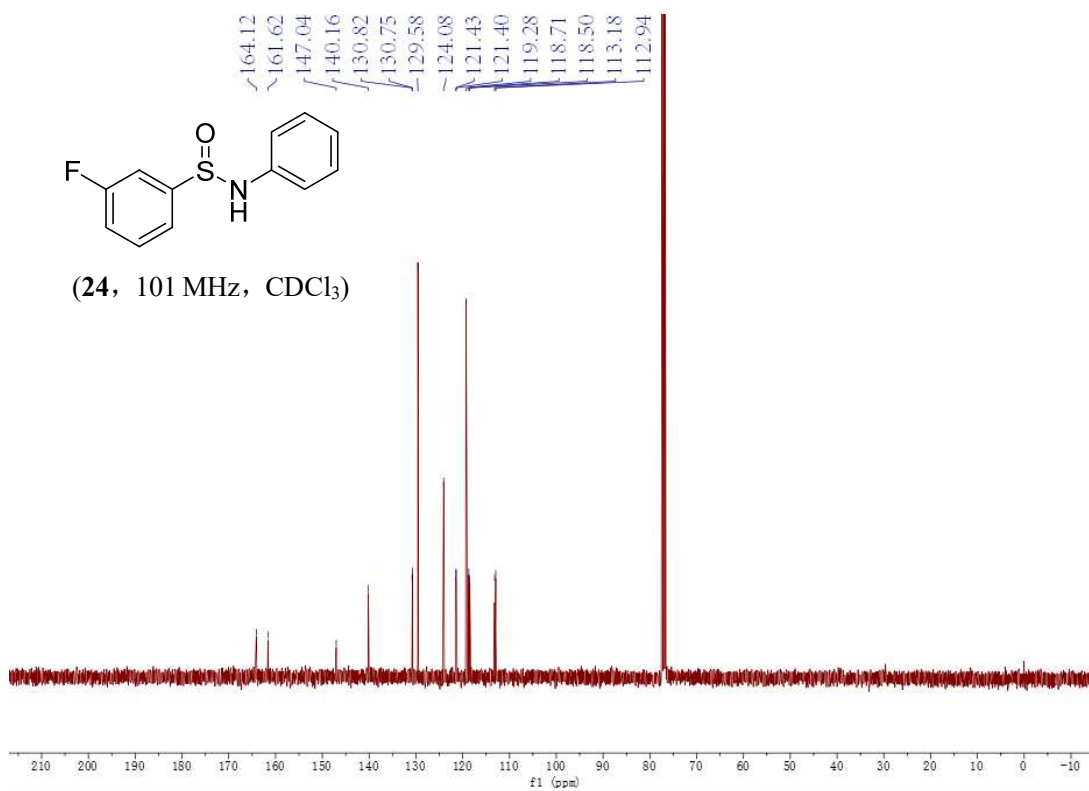

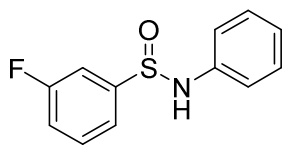

(24, 376MHz, CDCl<sub>3</sub>)

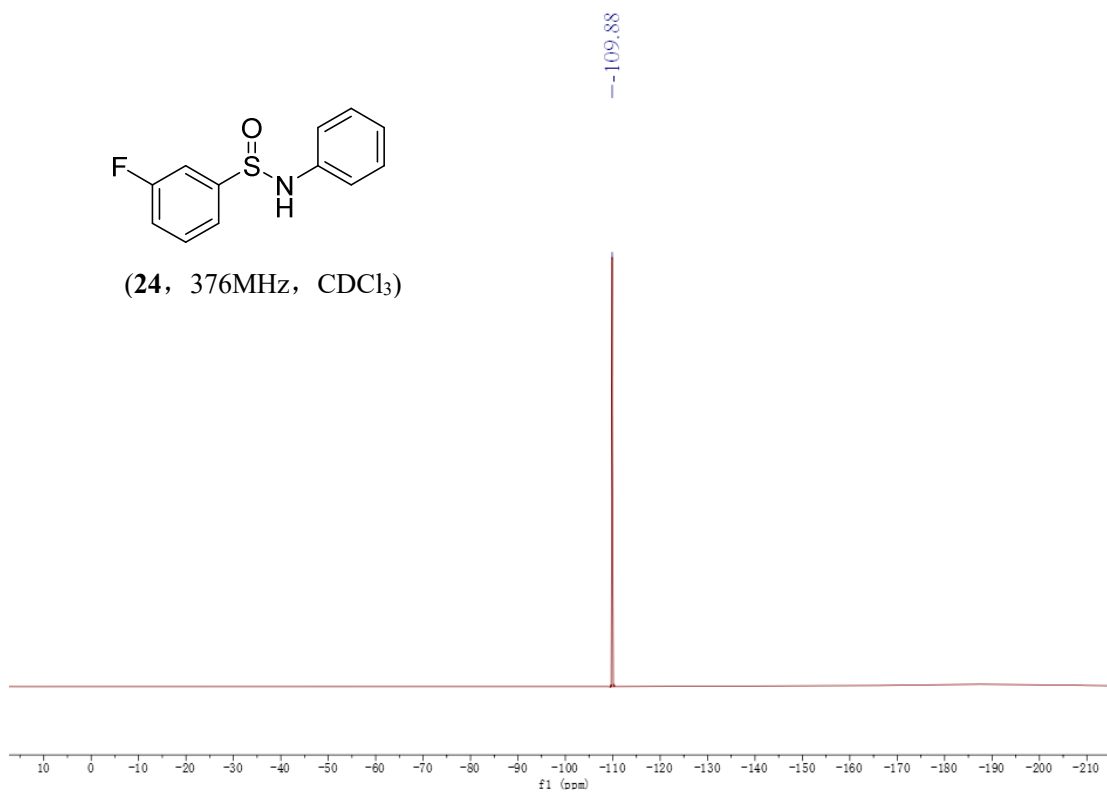

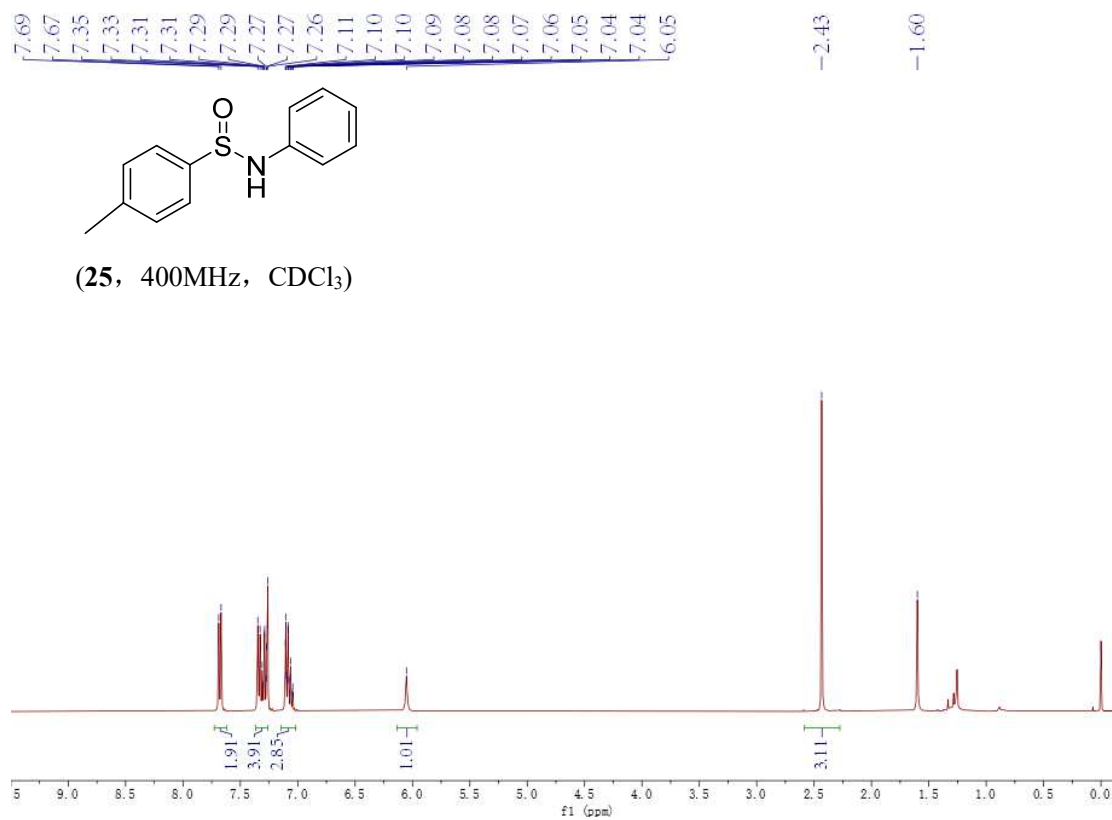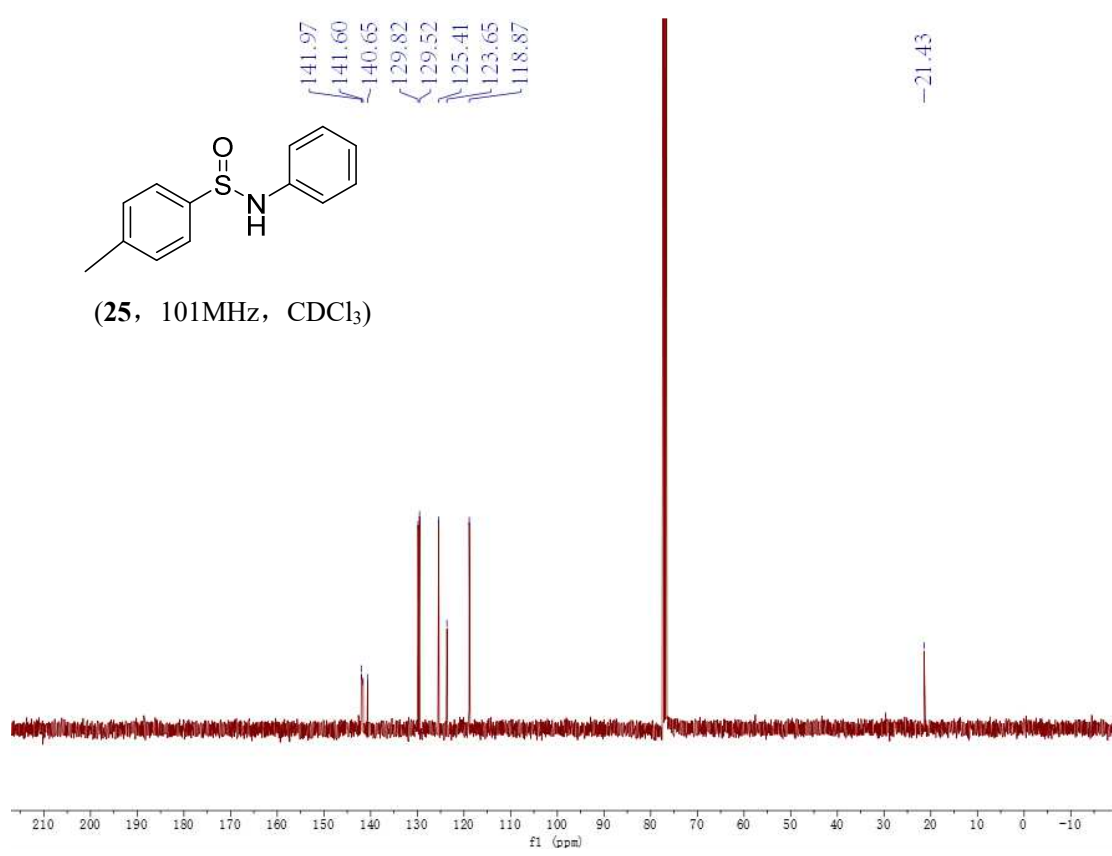

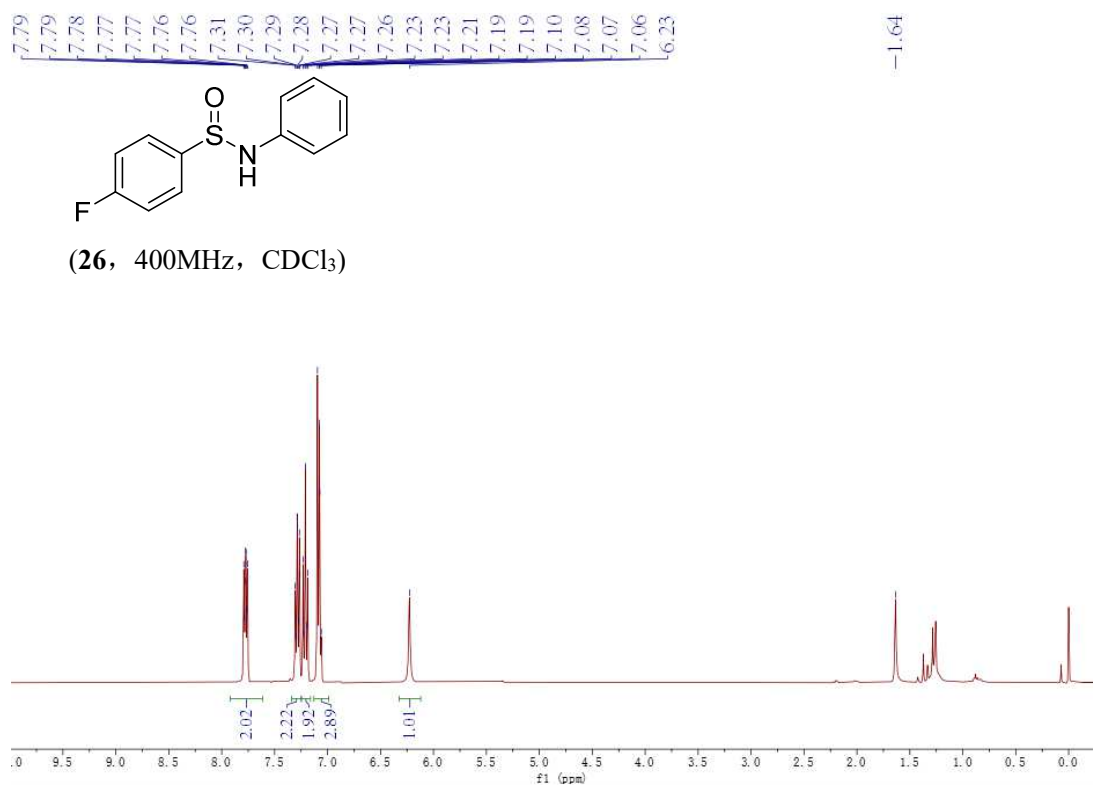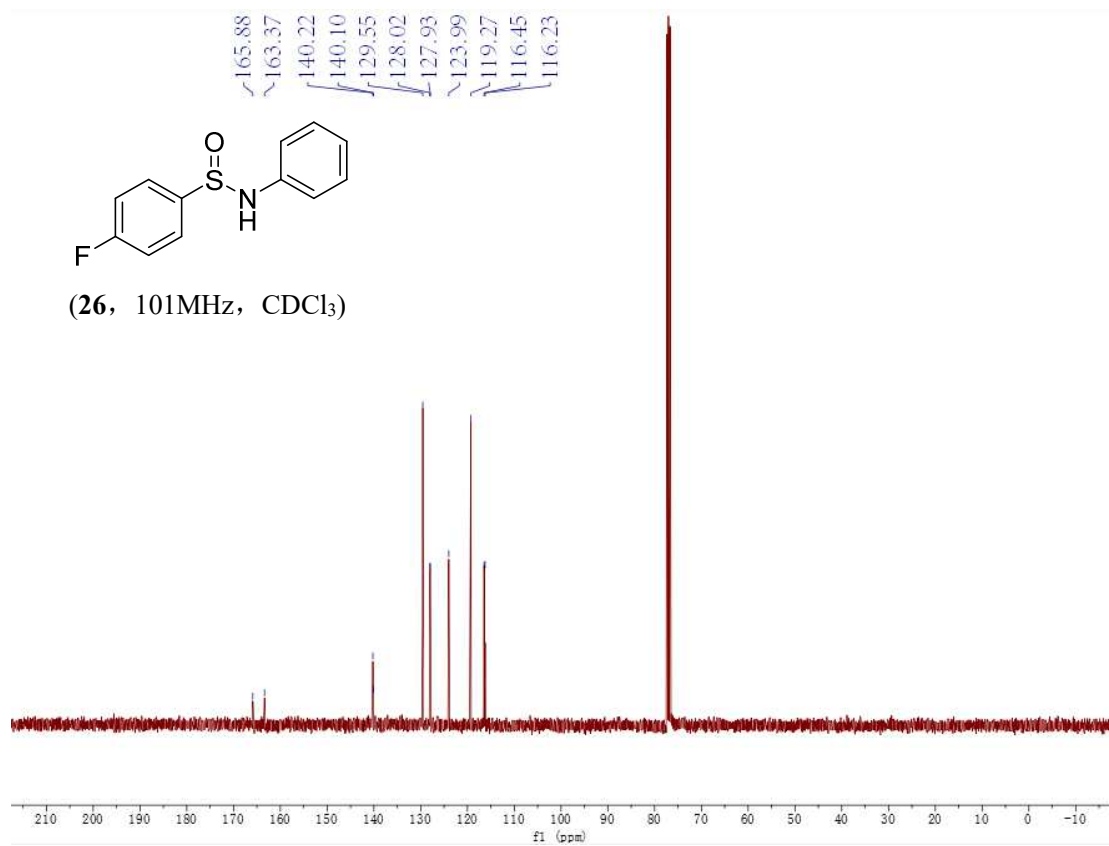

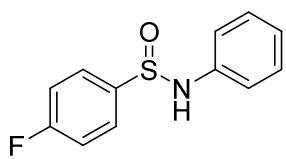

(26, 376MHz, CDCl<sub>3</sub>)

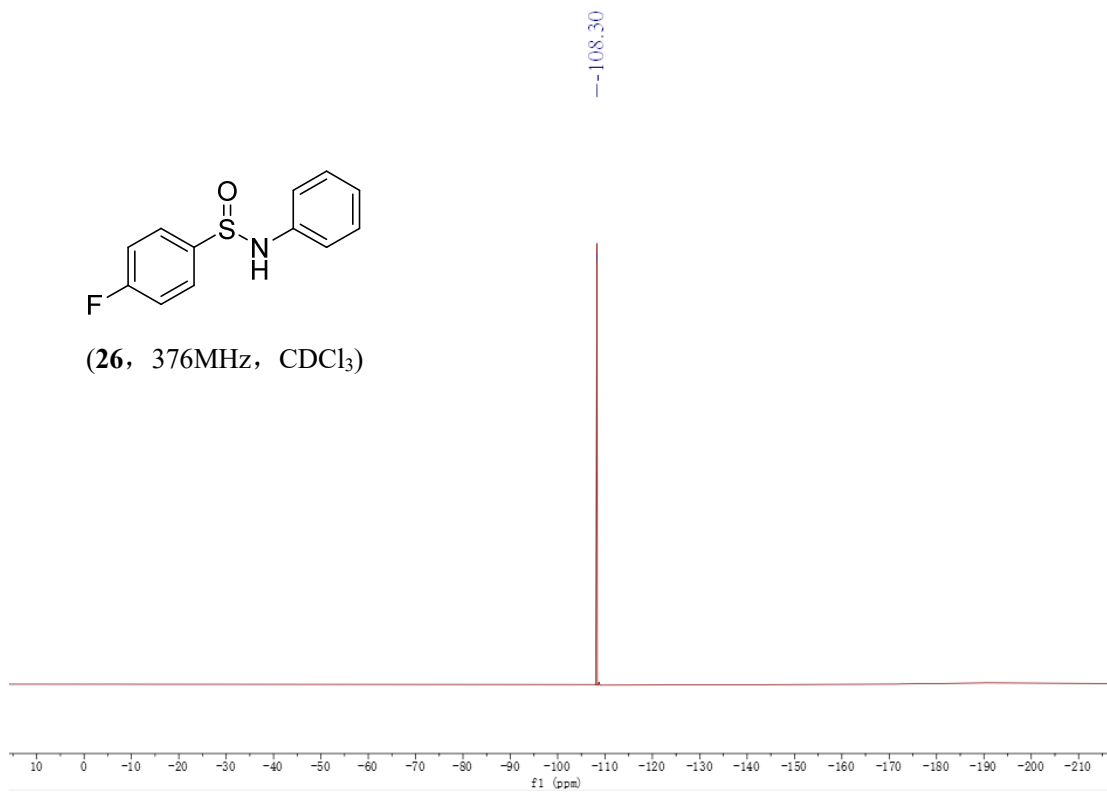



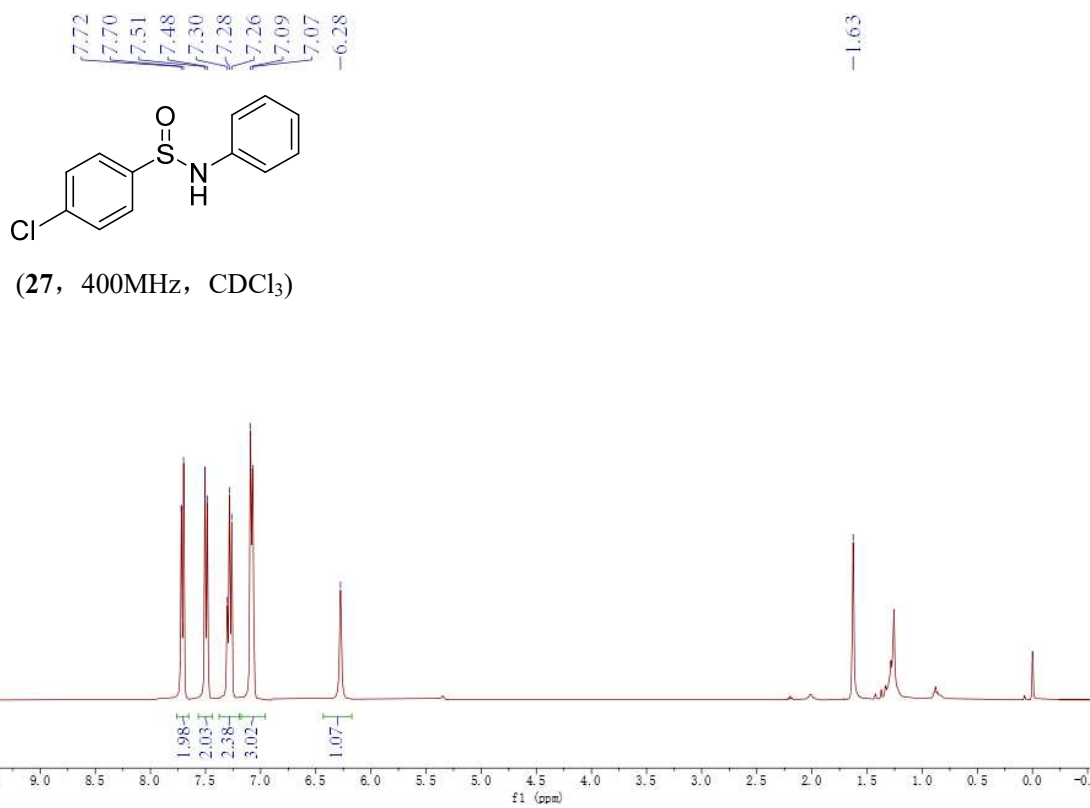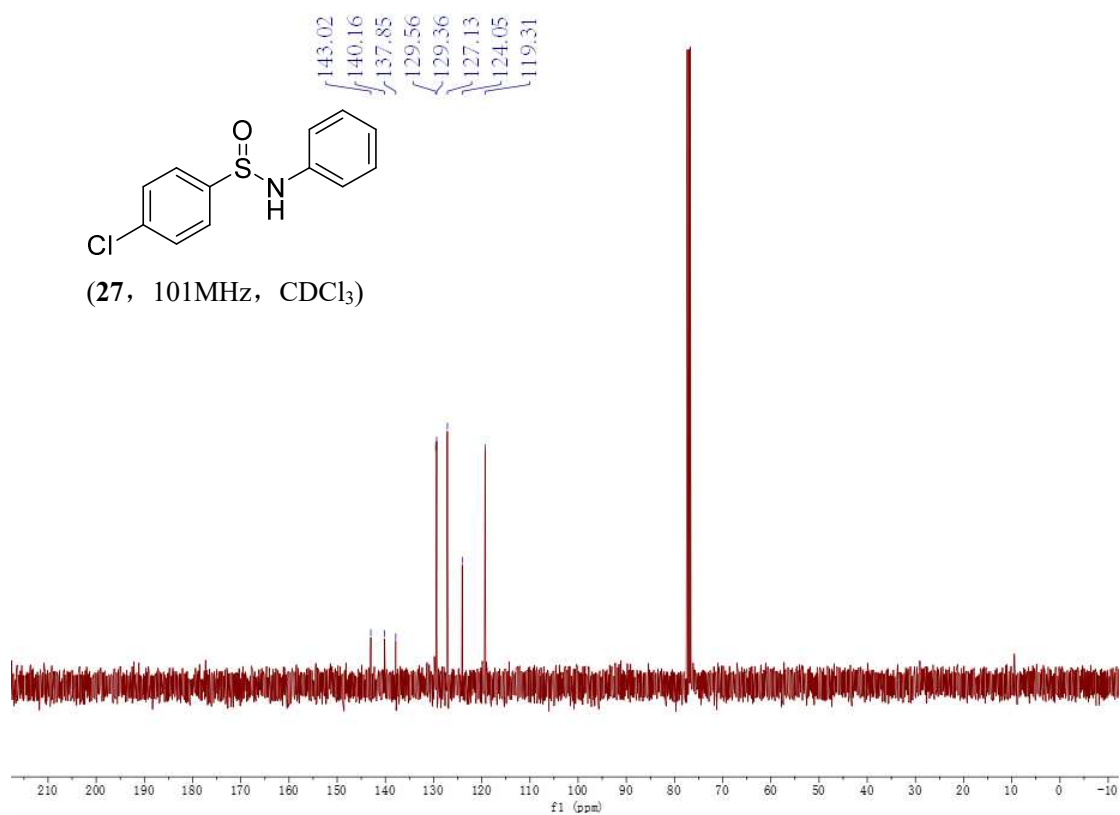

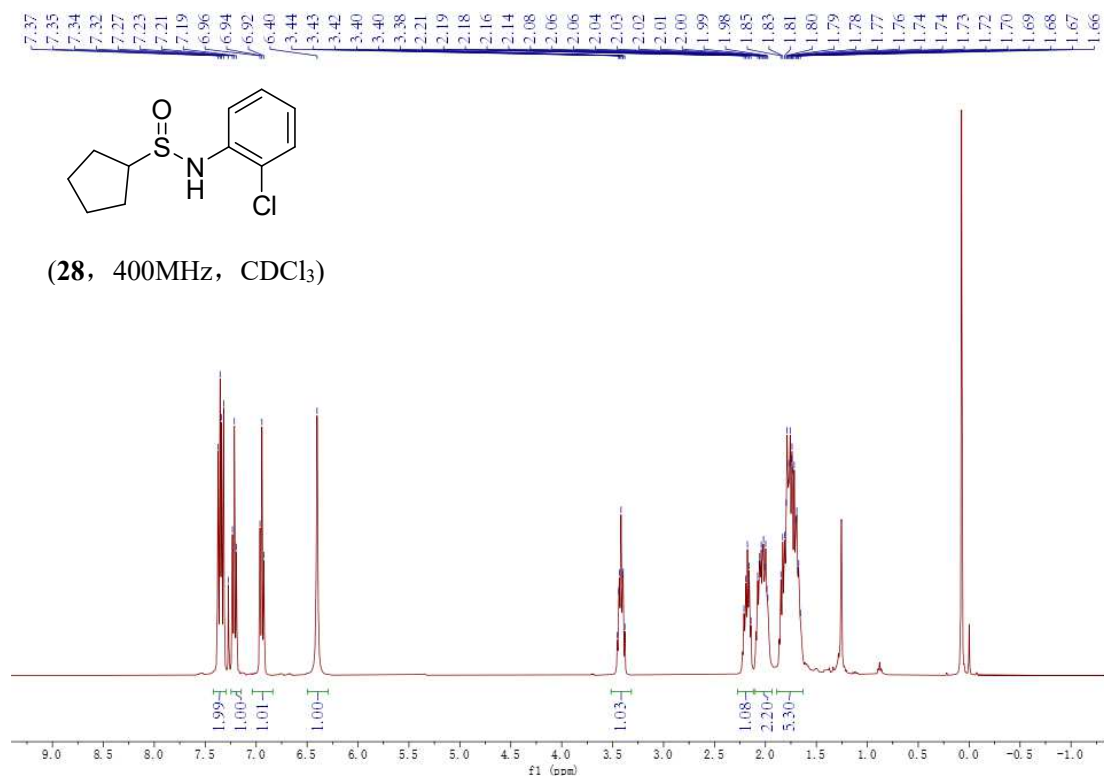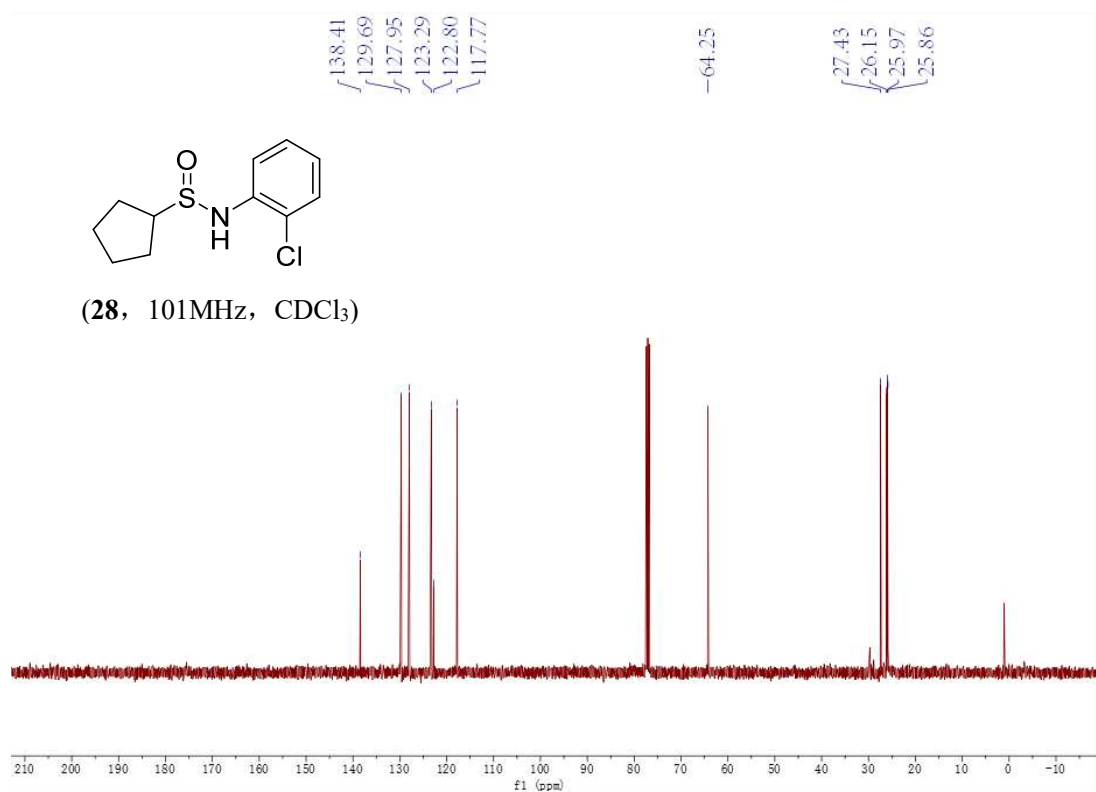

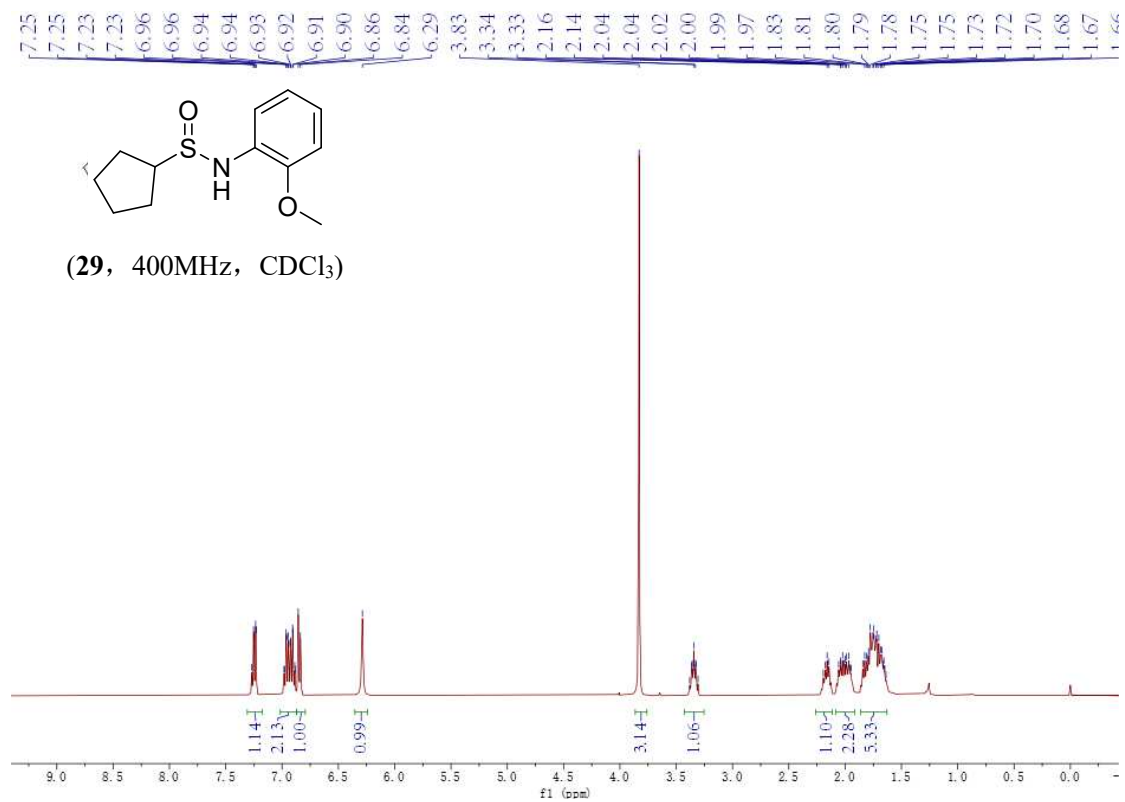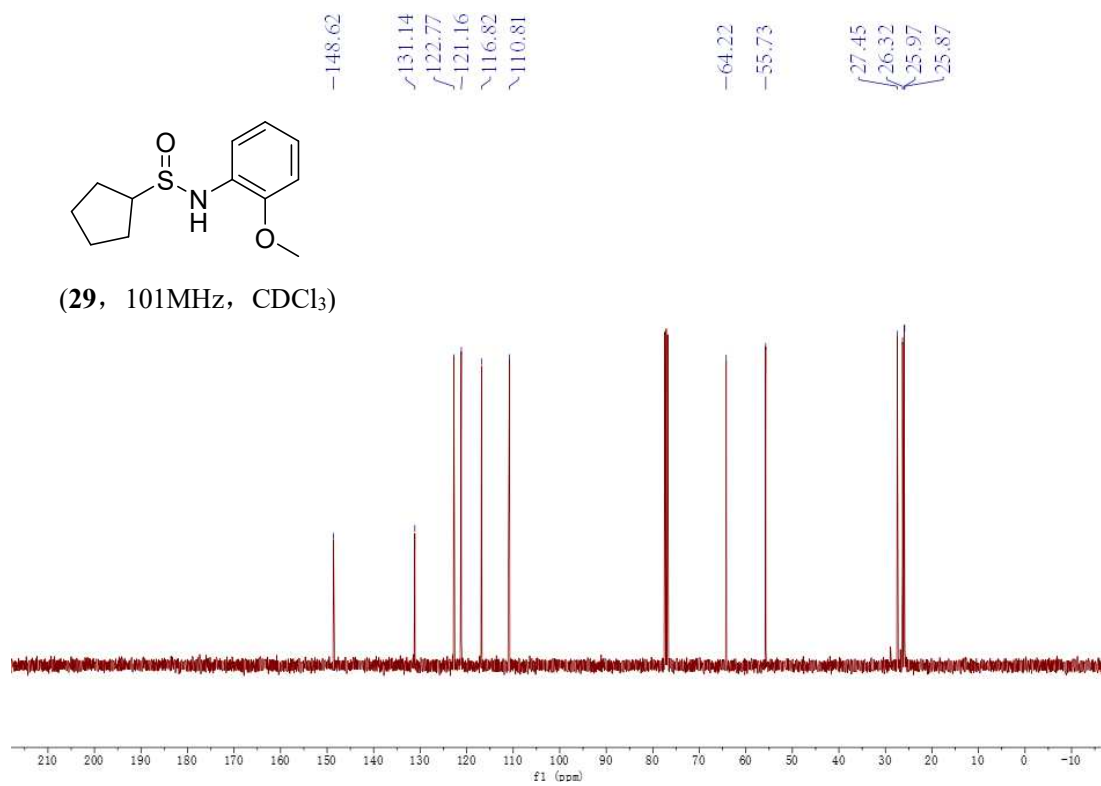

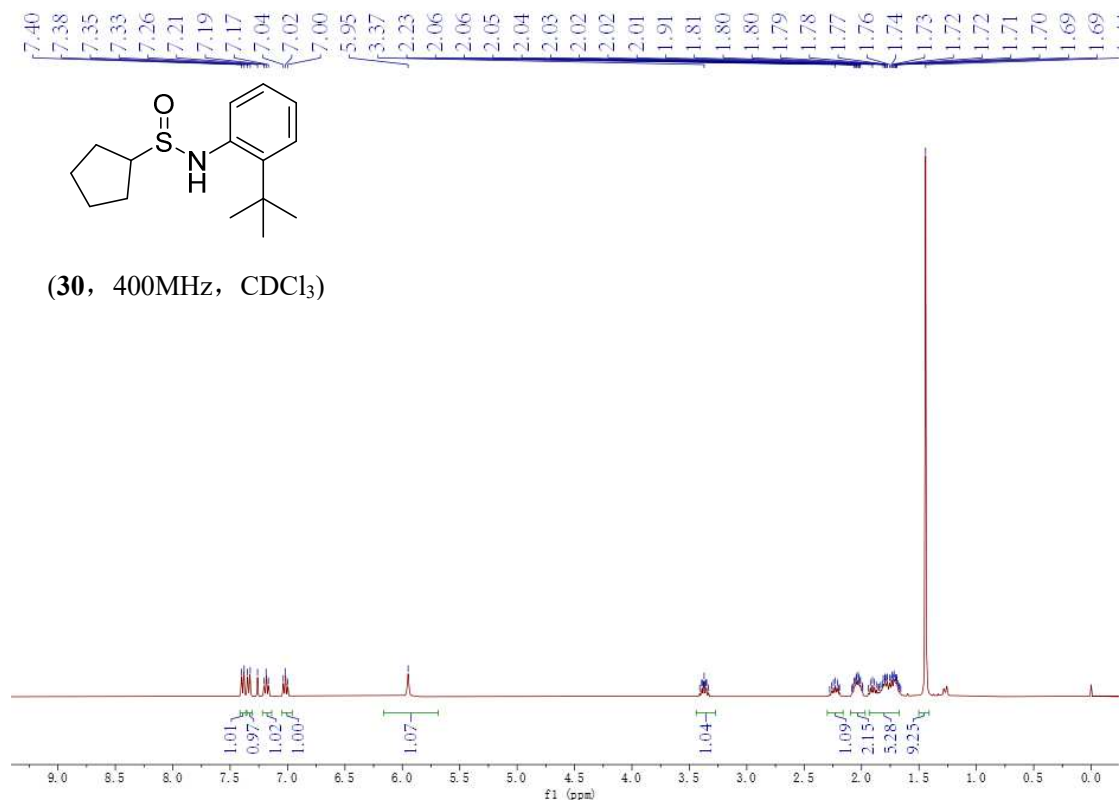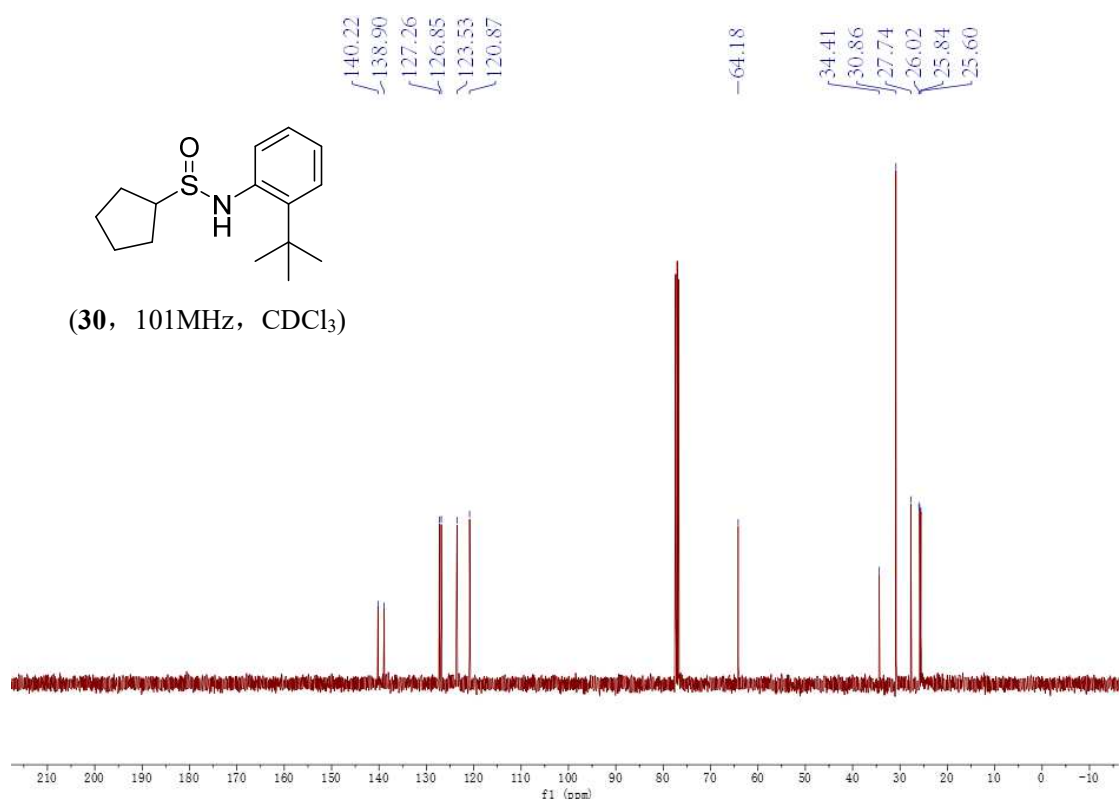

7.75  
7.27  
7.14  
7.13  
7.12  
6.79  
6.78  
6.77  
6.77  
6.76  
6.74  
6.74  
6.73  
6.64  
6.63  
3.49  
2.10  
1.93  
1.91  
1.91  
1.89  
1.88  
1.73  
1.71  
1.70  
1.69  
1.69  
1.68  
1.68  
1.66  
1.66  
1.65  
1.64  
1.63  
1.62  
1.61  
1.60  
1.58  
1.57

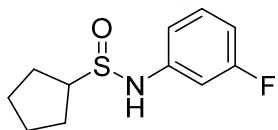

(31, 400MHz, CDCl<sub>3</sub>)

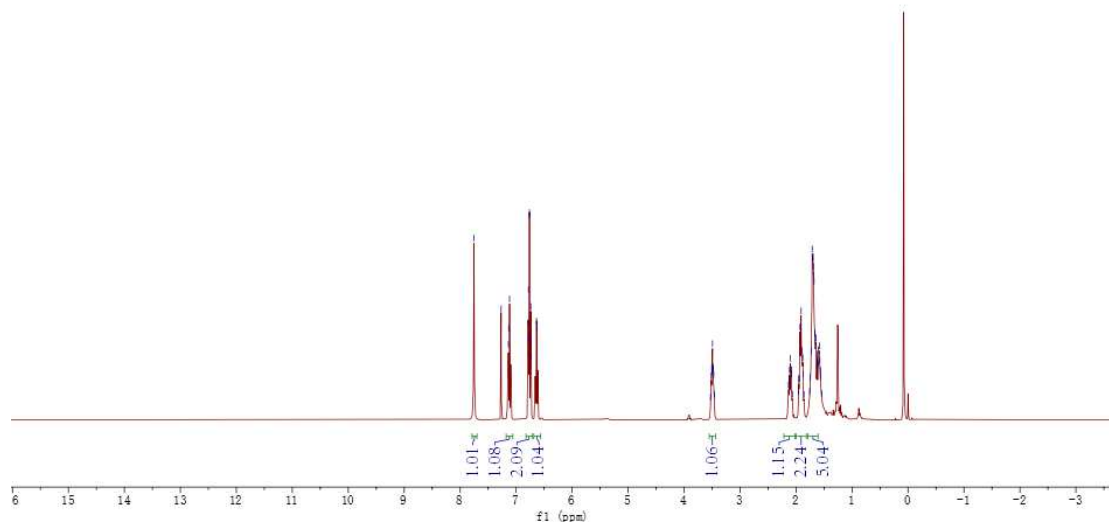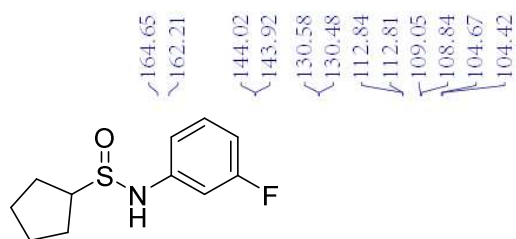

(31, 101MHz, CDCl<sub>3</sub>)

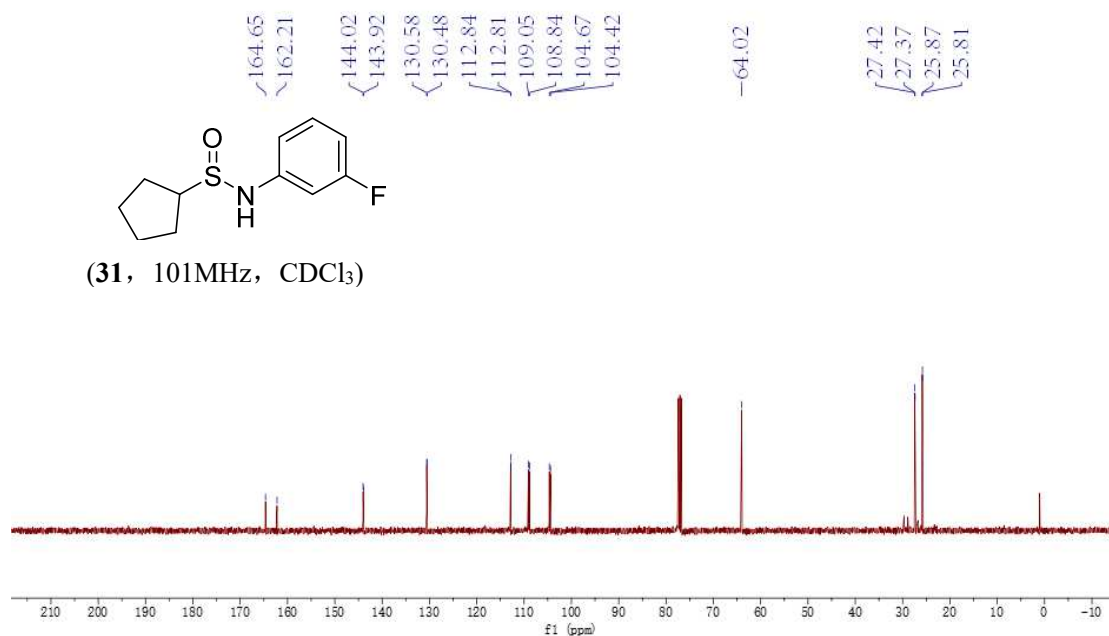

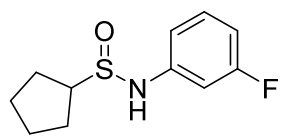

(31, 376MHz, CDCl<sub>3</sub>)

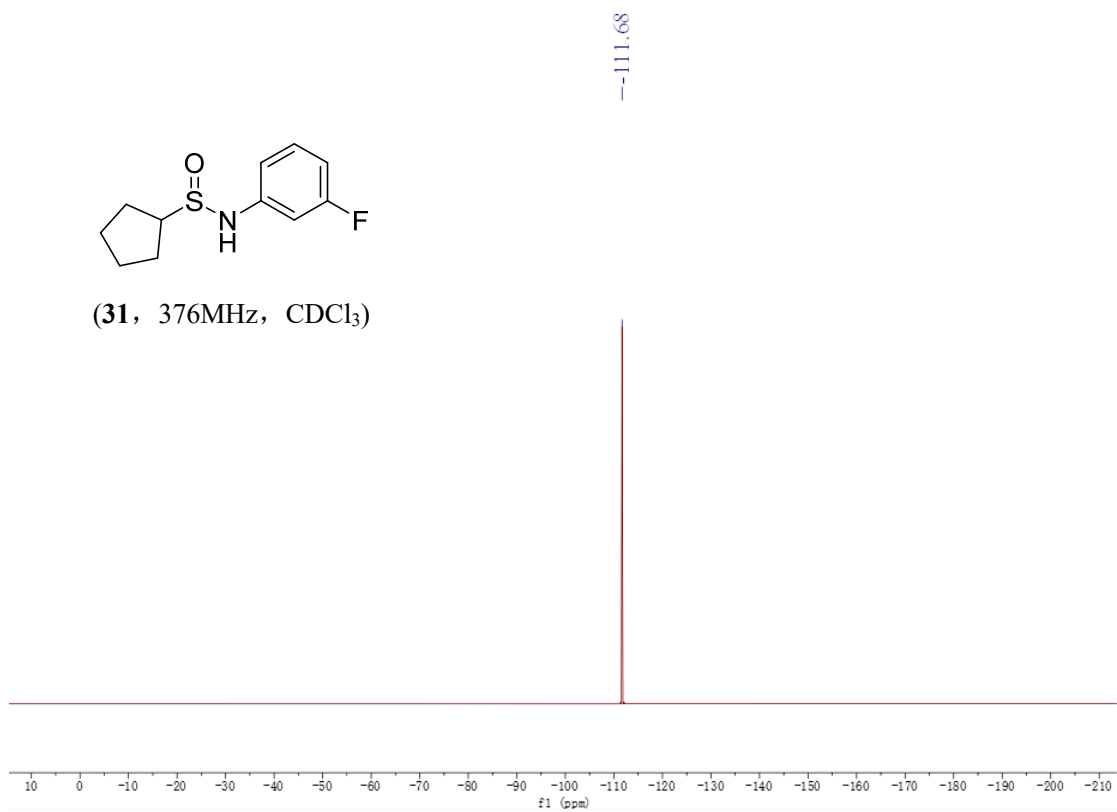

7.93  
7.19  
7.07  
7.06  
7.05  
7.05  
7.05  
7.03  
7.01  
6.94  
6.94  
6.93  
6.92  
6.92  
6.91  
3.49  
3.48  
3.47  
2.11  
2.09  
2.07  
1.93  
1.92  
1.91  
1.90  
1.89  
1.87  
1.87  
1.72  
1.71  
1.70  
1.69  
1.68  
1.67  
1.66  
1.65  
1.65  
1.64  
1.63  
1.62

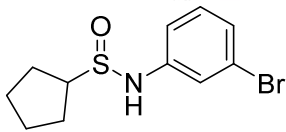

(32, 400MHz, CDCl<sub>3</sub>)

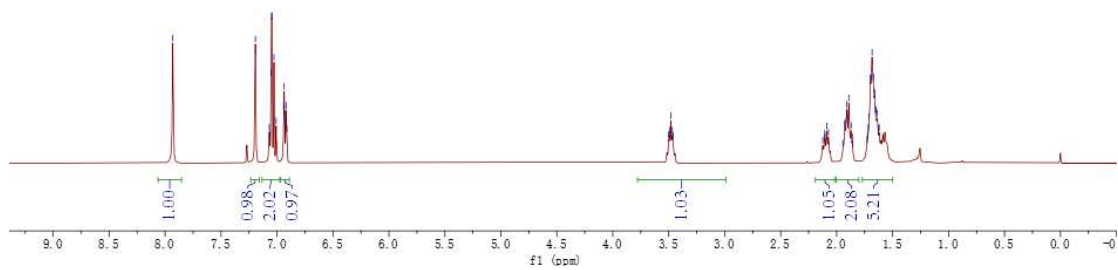

-143.70  
130.61  
125.16  
123.08  
120.10  
115.72  
-64.04  
27.50  
27.45  
25.89  
25.84

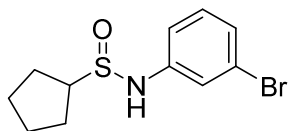

(32, 101MHz, CDCl<sub>3</sub>)

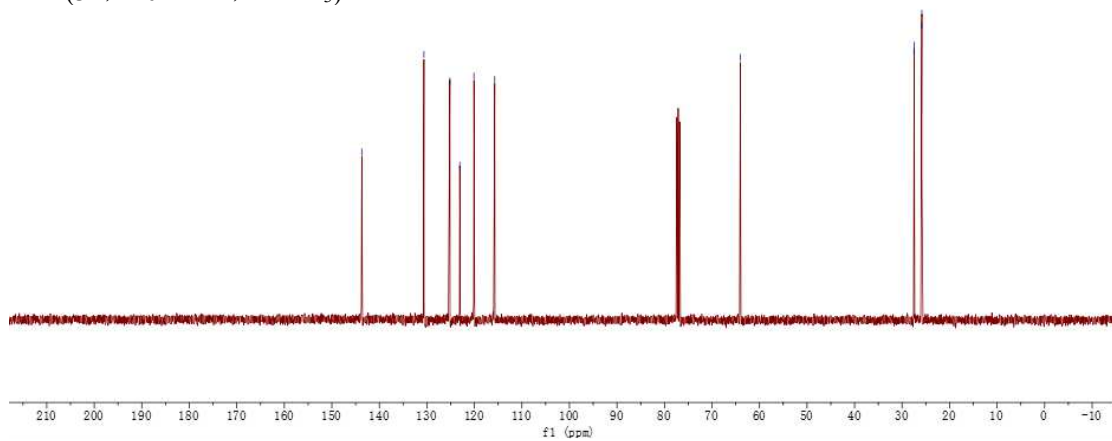

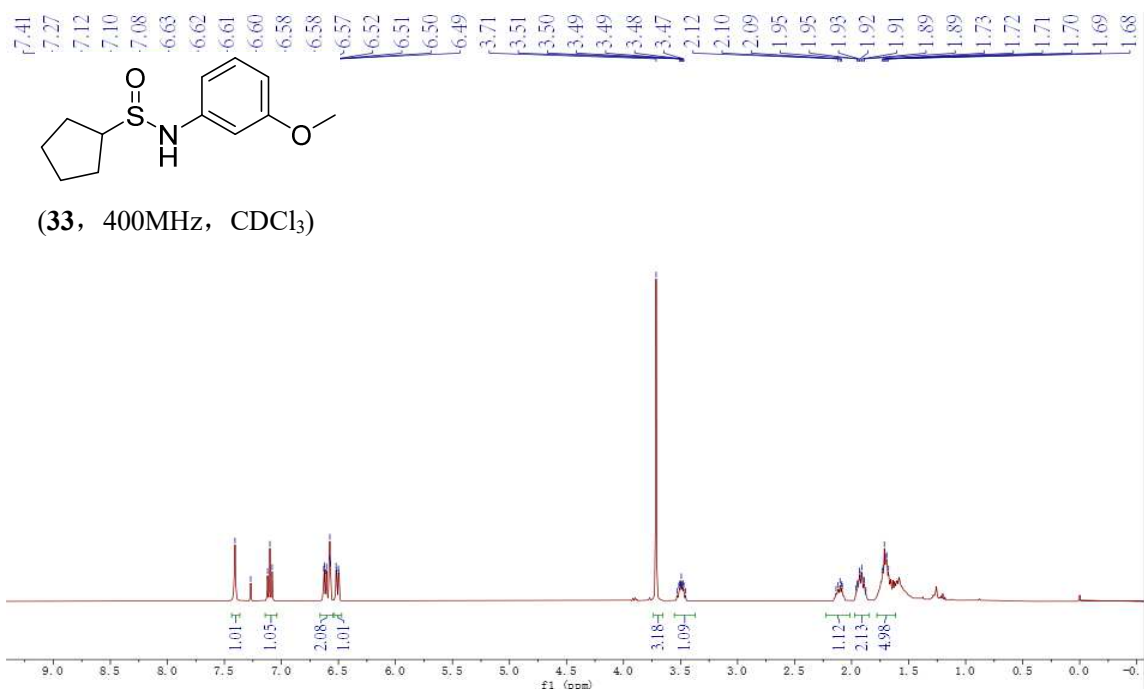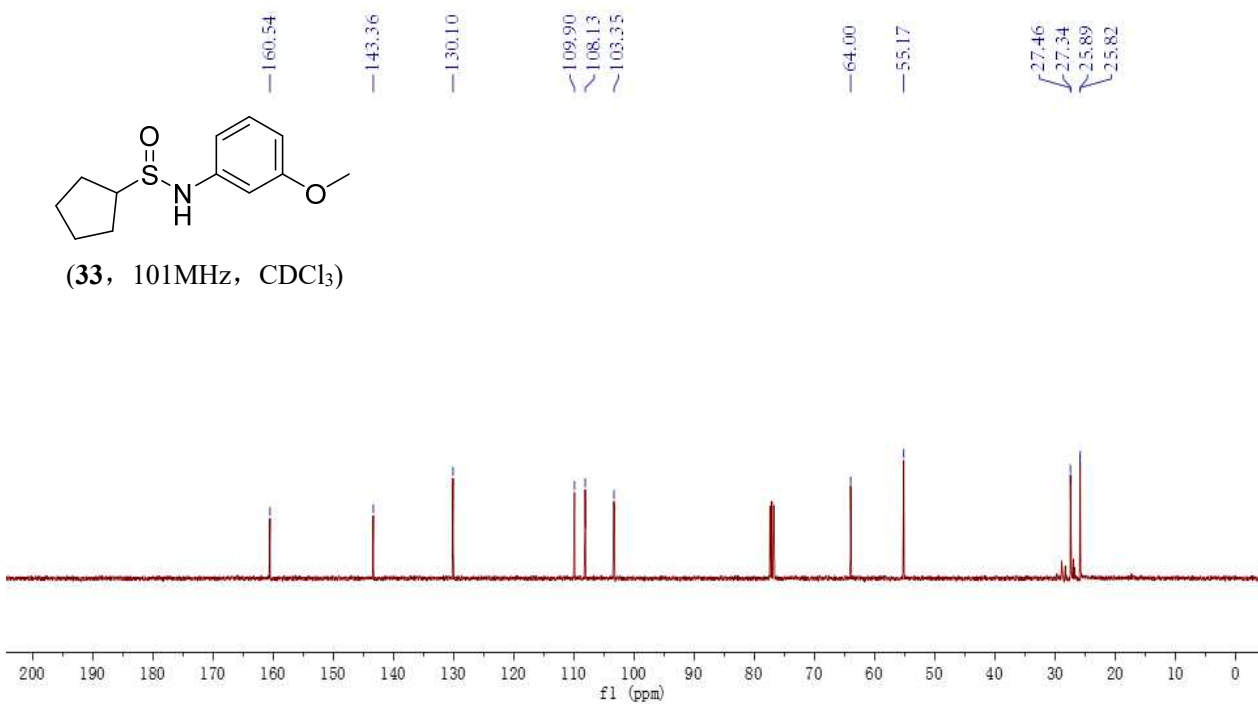



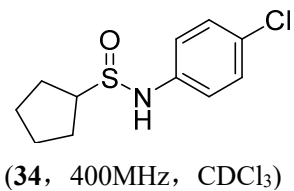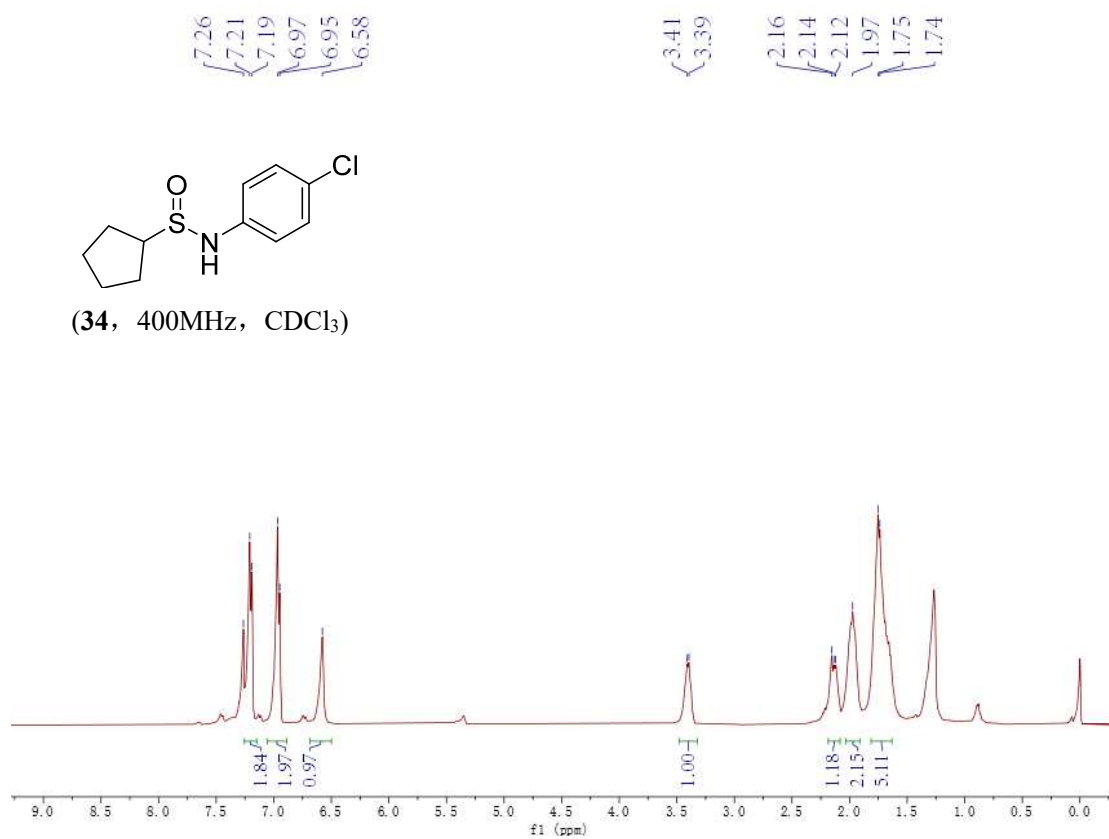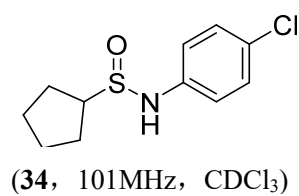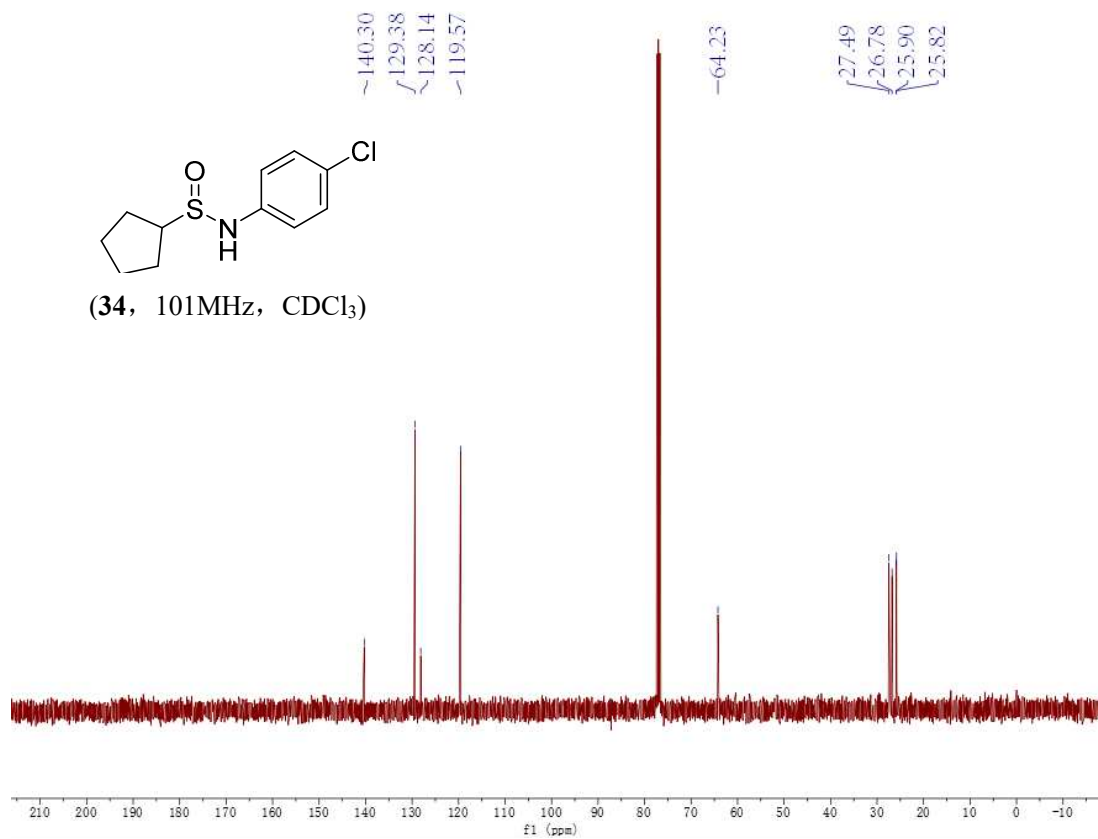

7.41  
7.31  
7.29  
6.89  
6.89  
6.87  
6.87  
3.50  
3.48  
3.48  
3.46  
3.45  
3.45  
3.44  
3.43  
2.13  
2.11  
2.09  
2.08  
2.07  
1.95  
1.93  
1.92  
1.91  
1.89  
1.89  
1.86  
1.86  
1.72  
1.71  
1.70  
1.70  
1.69  
1.68  
1.67  
1.66

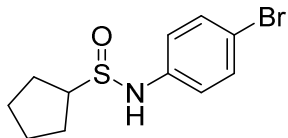

(35, 400MHz, CDCl<sub>3</sub>)

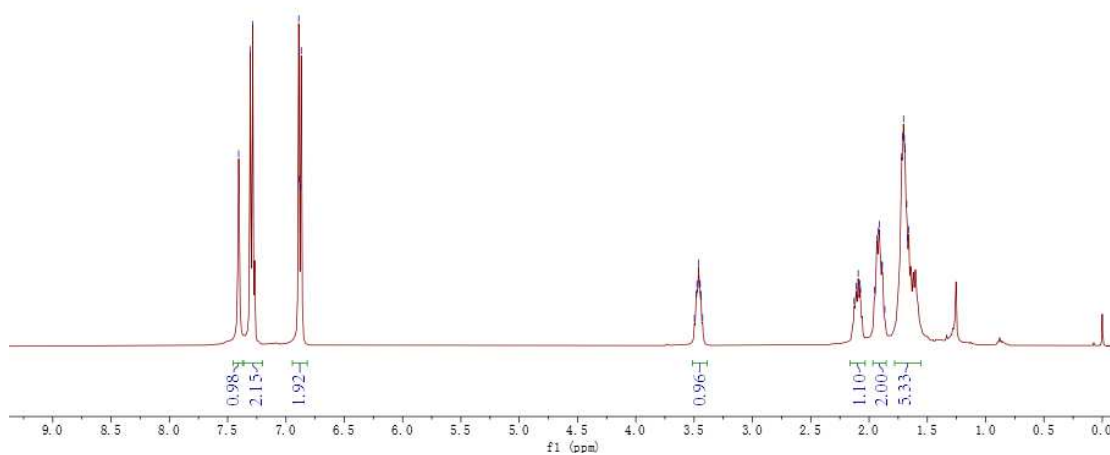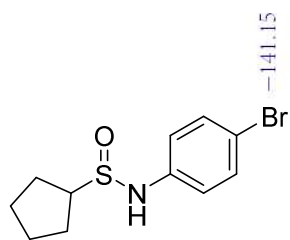

(35, 101MHz, CDCl<sub>3</sub>)

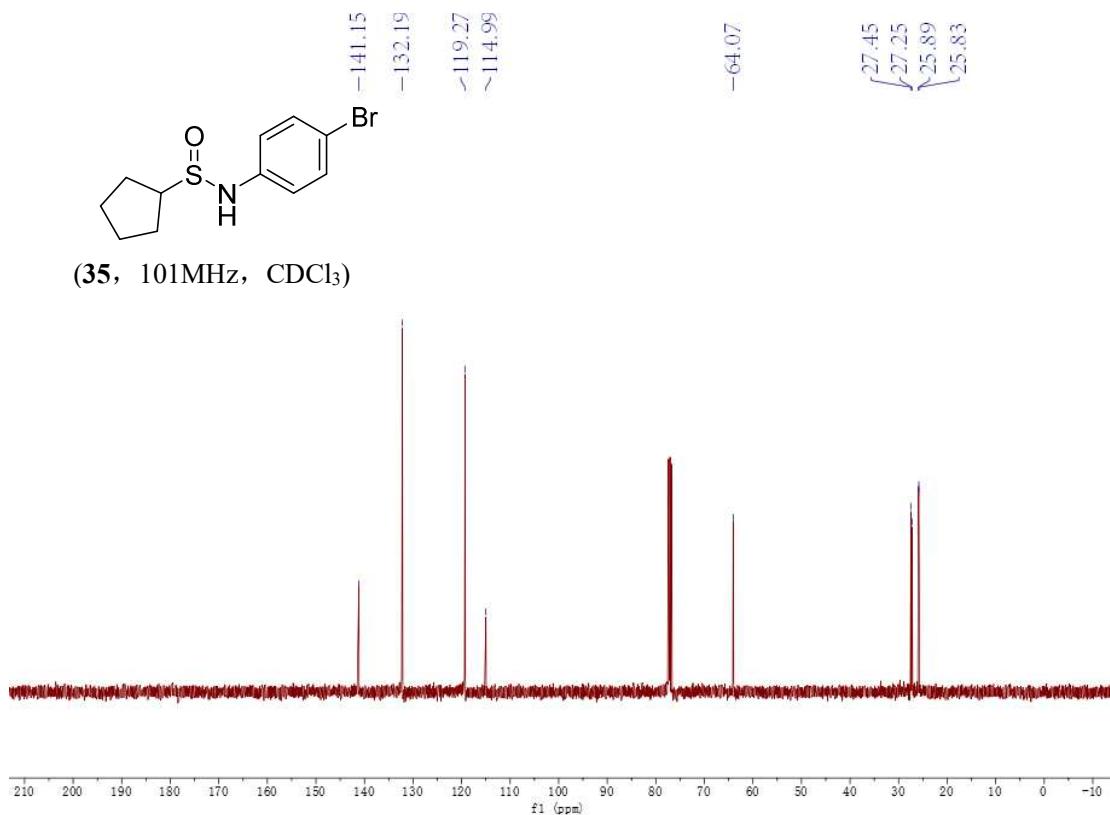

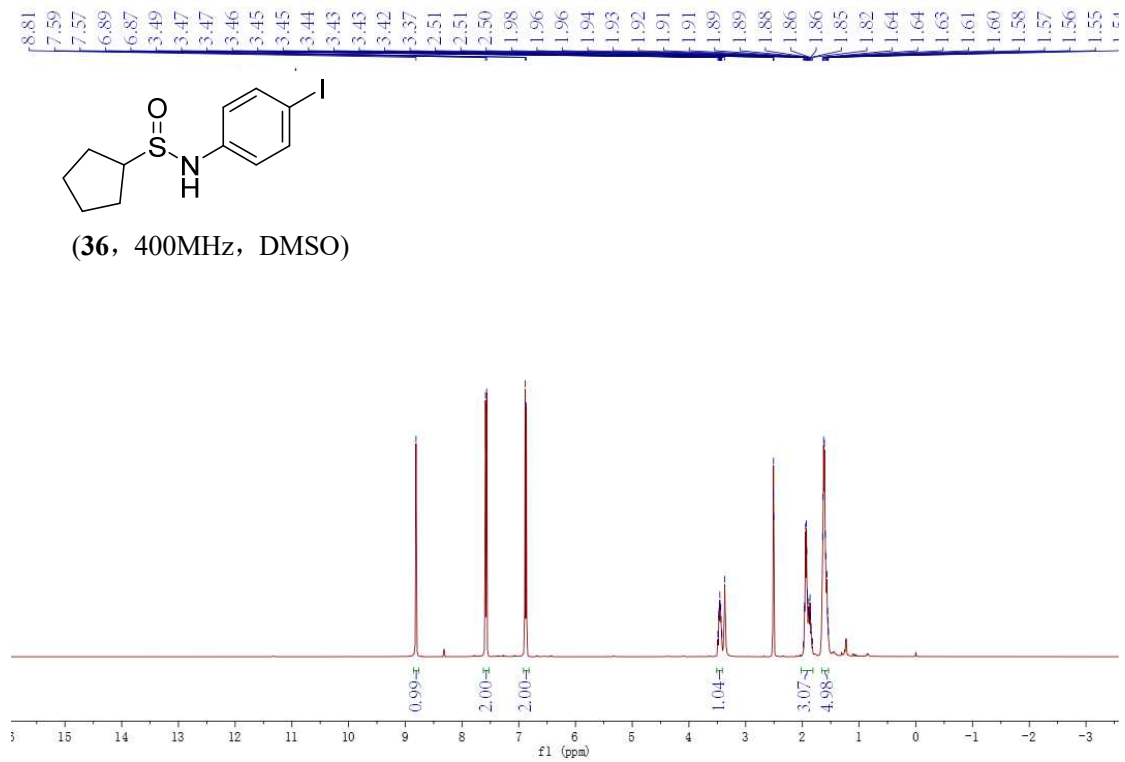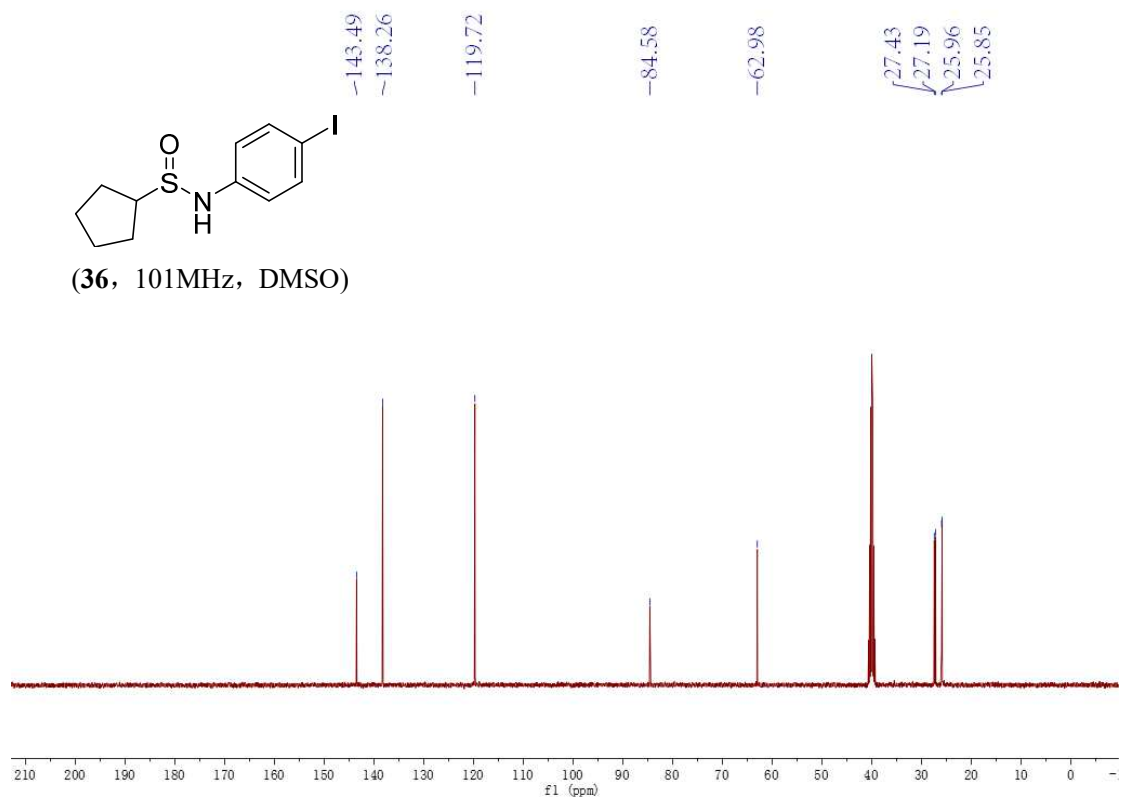

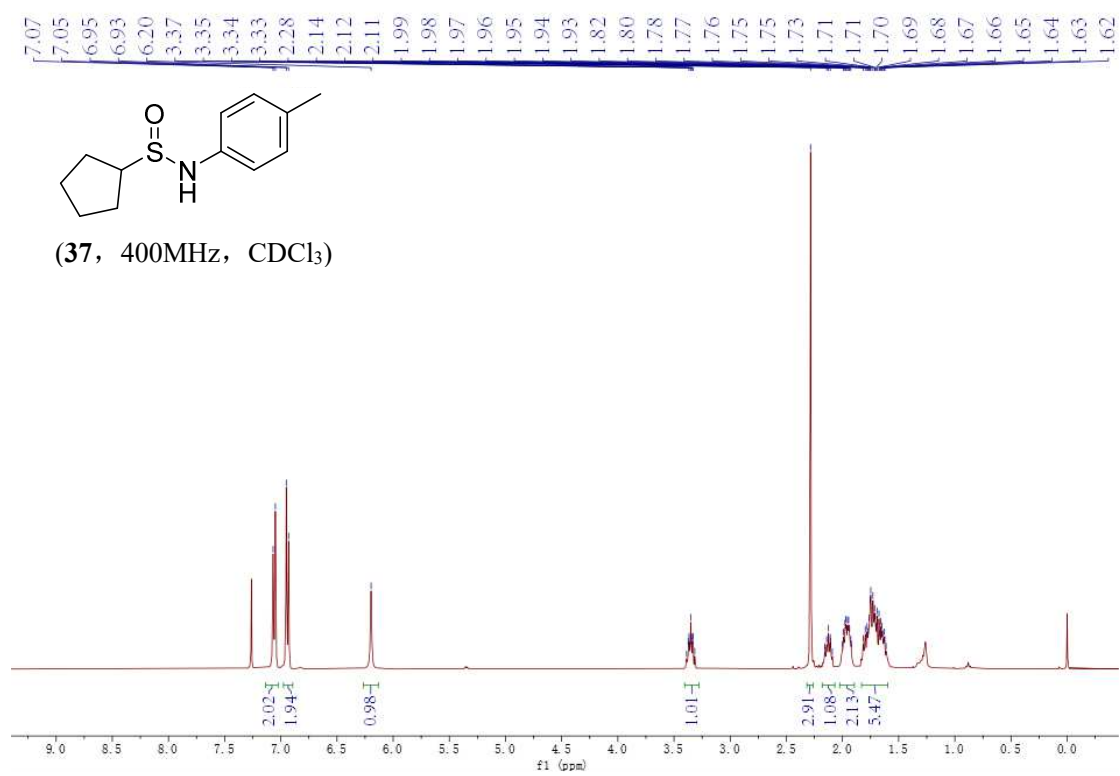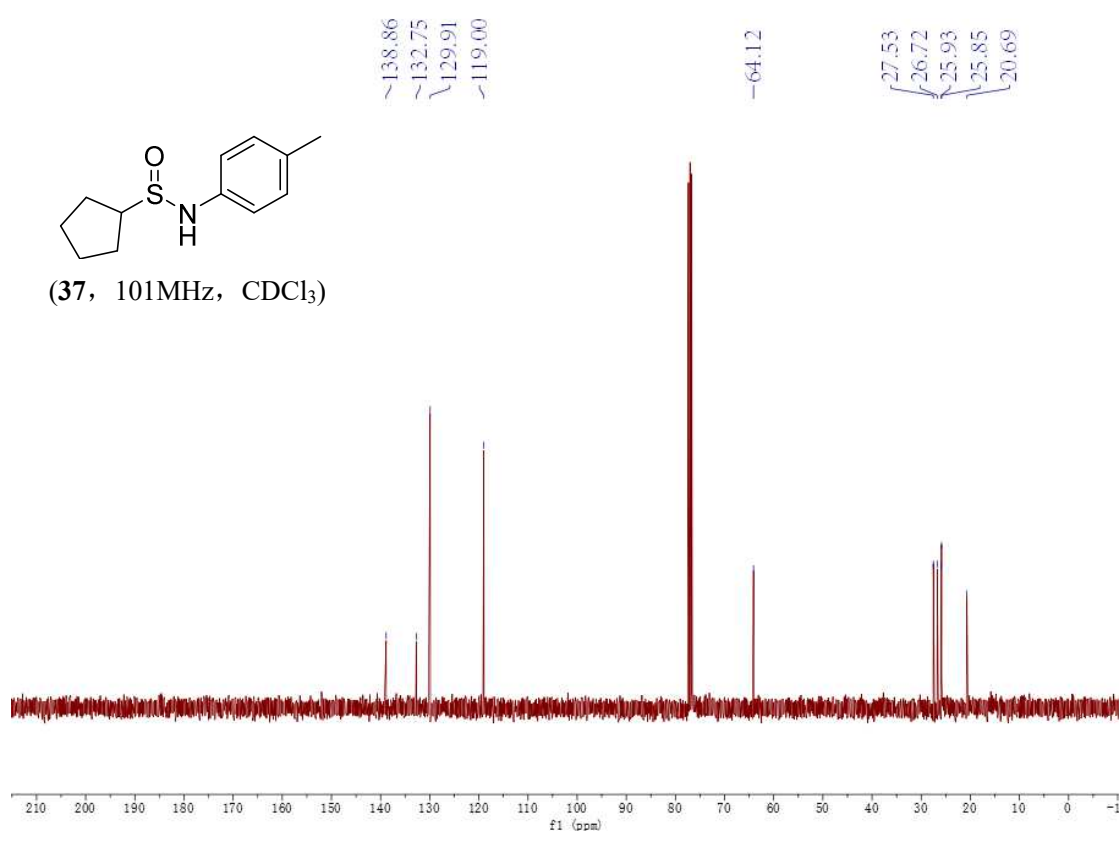

7.60  
7.58  
7.44  
7.42  
7.26  
7.06  
7.04  
3.54  
3.52  
3.52  
3.50  
3.50  
3.49  
3.48  
2.16  
2.14  
2.14  
2.12  
2.11  
2.10  
2.09  
1.98  
1.98  
1.97  
1.96  
1.95  
1.94  
1.93  
1.92  
1.91  
1.91  
1.76  
1.74  
1.74  
1.73  
1.72  
1.71  
1.70  
1.69  
1.68

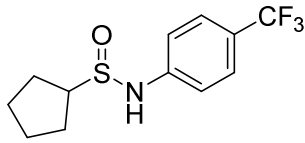

(38, 400MHz, CDCl<sub>3</sub>)

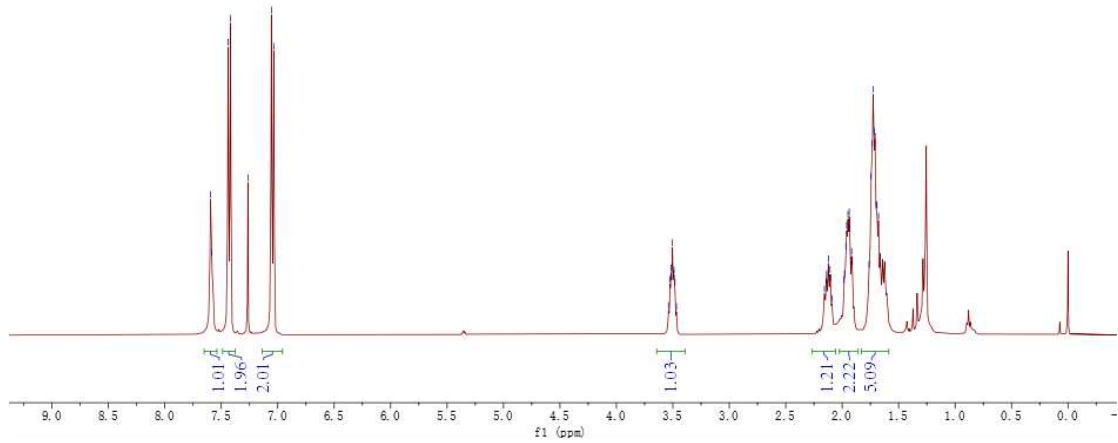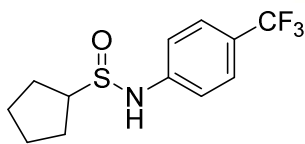

(38, 101MHz, CDCl<sub>3</sub>)

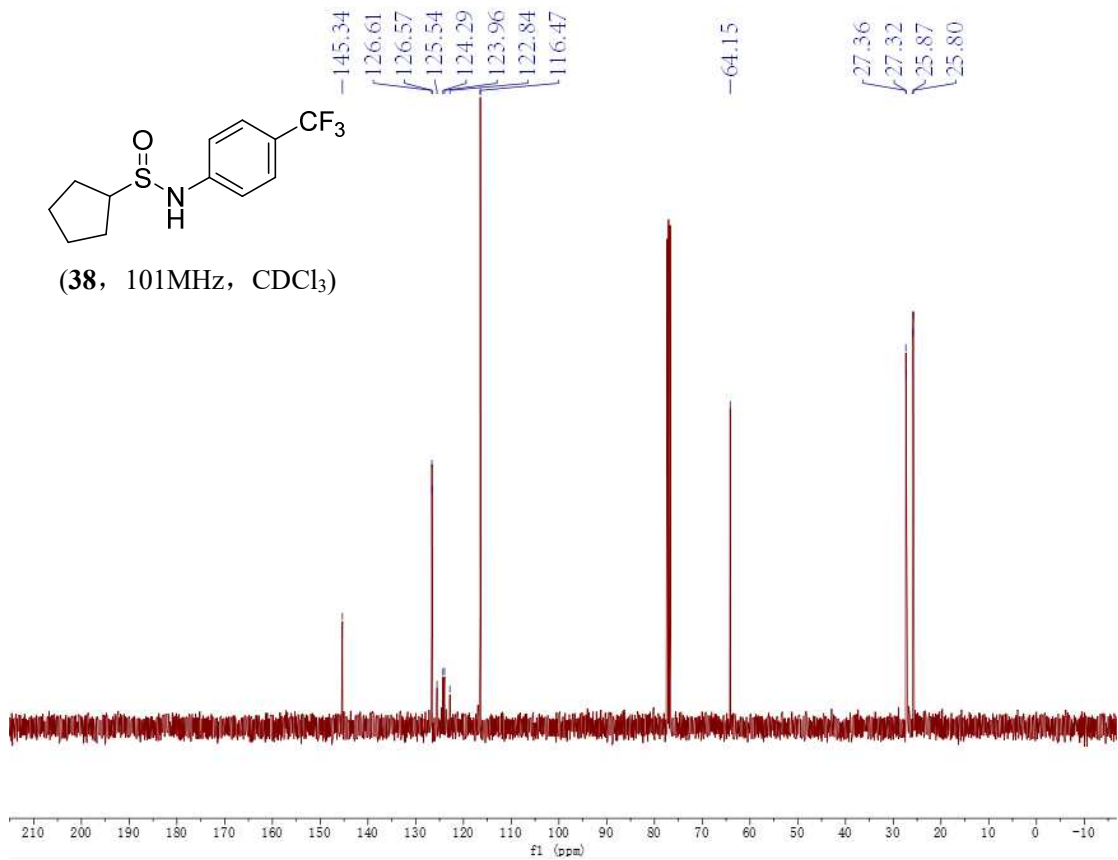

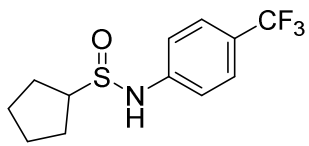

(38, 376MHz, CDCl<sub>3</sub>)

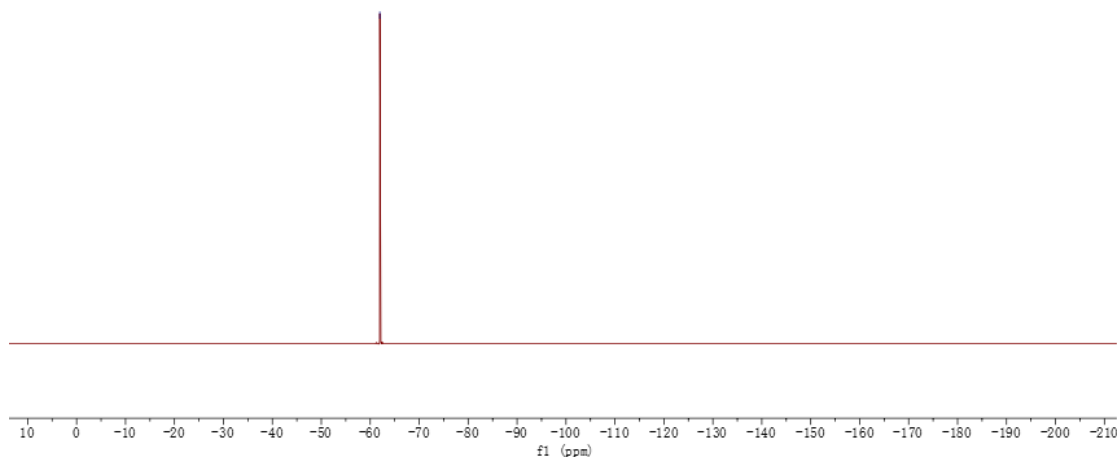

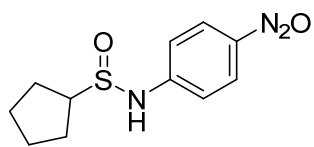

(39, 400MHz, DMSO)

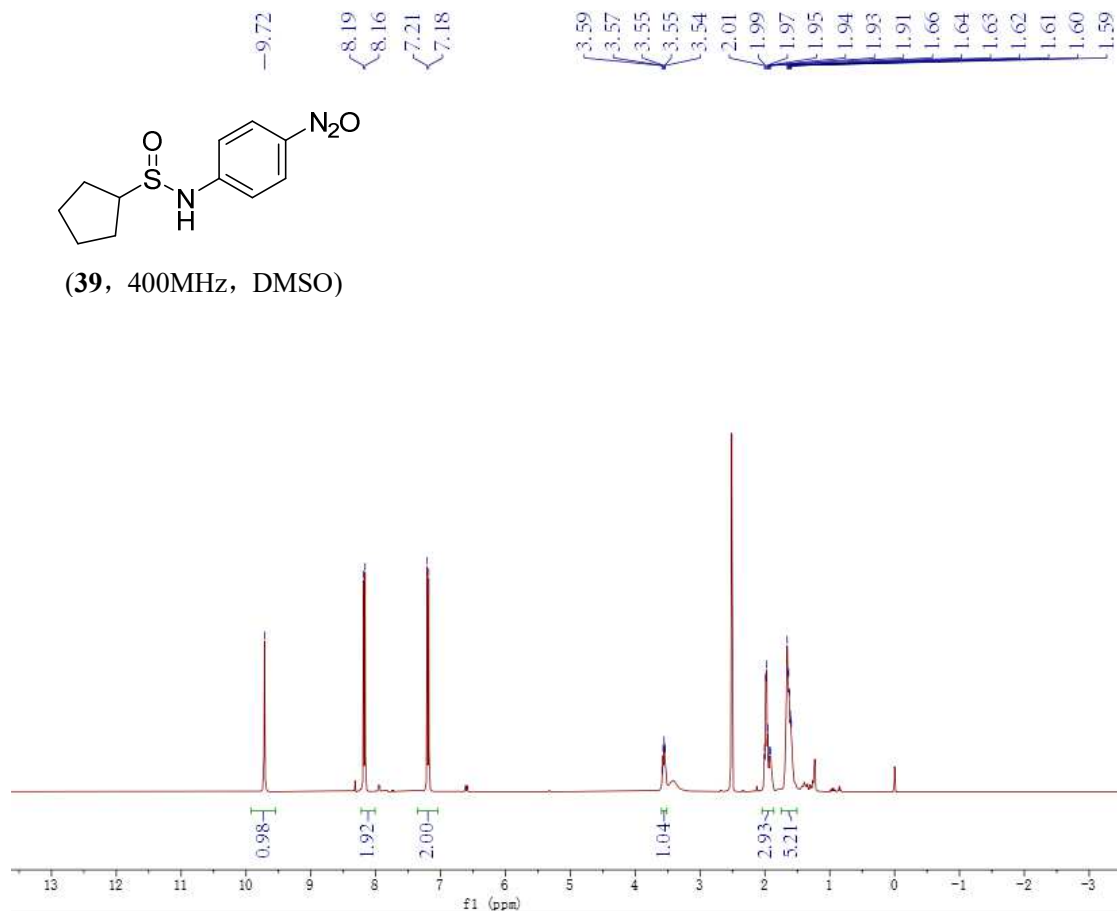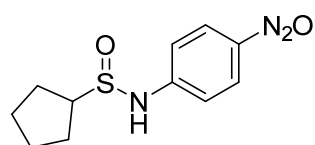

(39, 101MHz, DMSO)

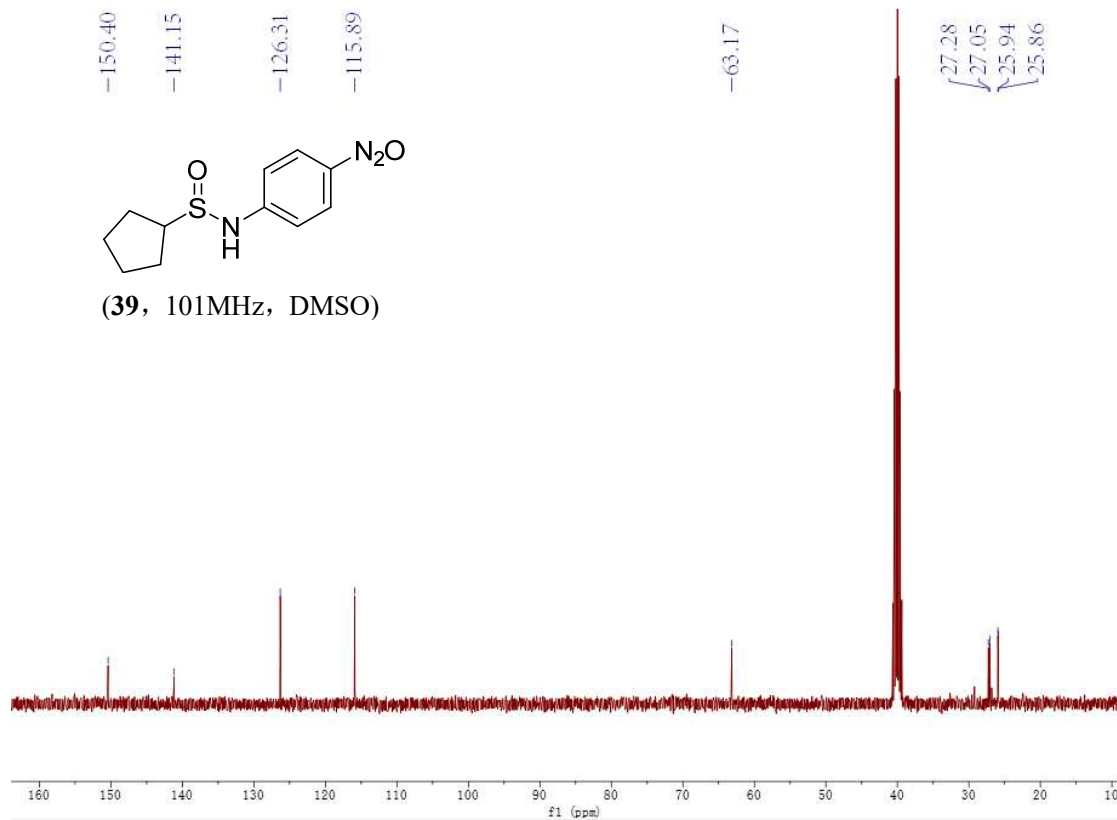

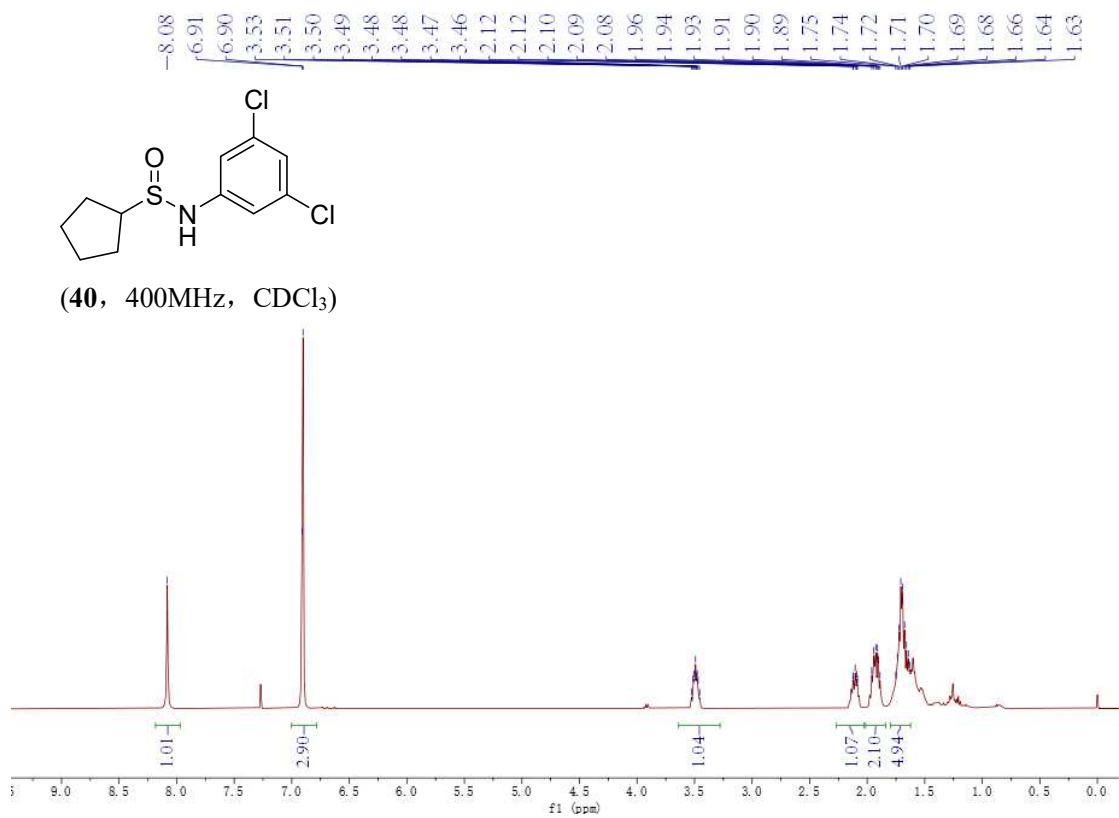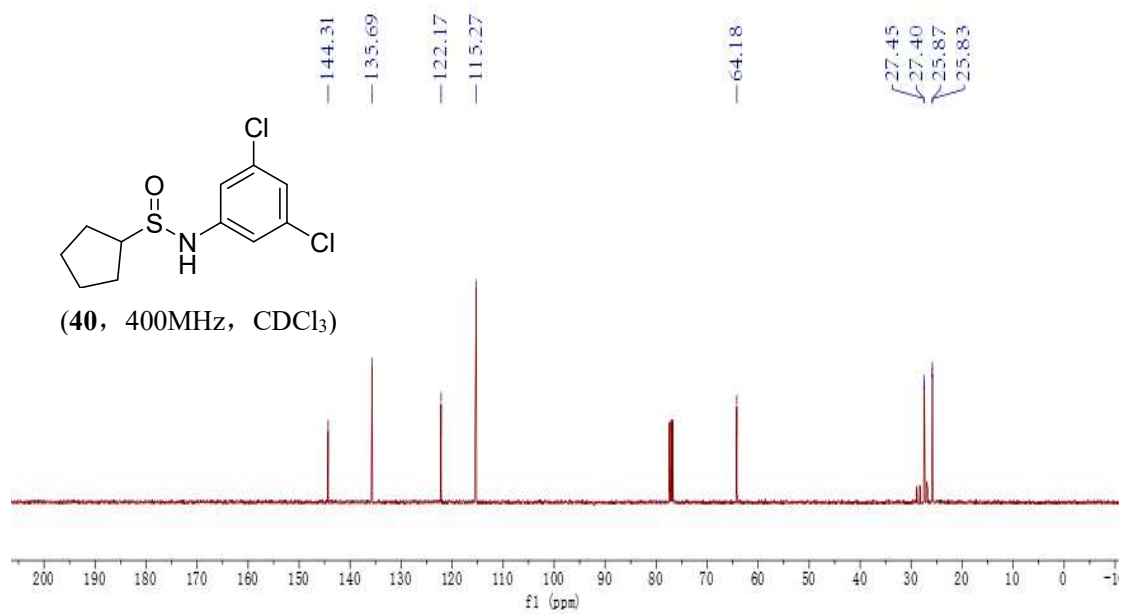



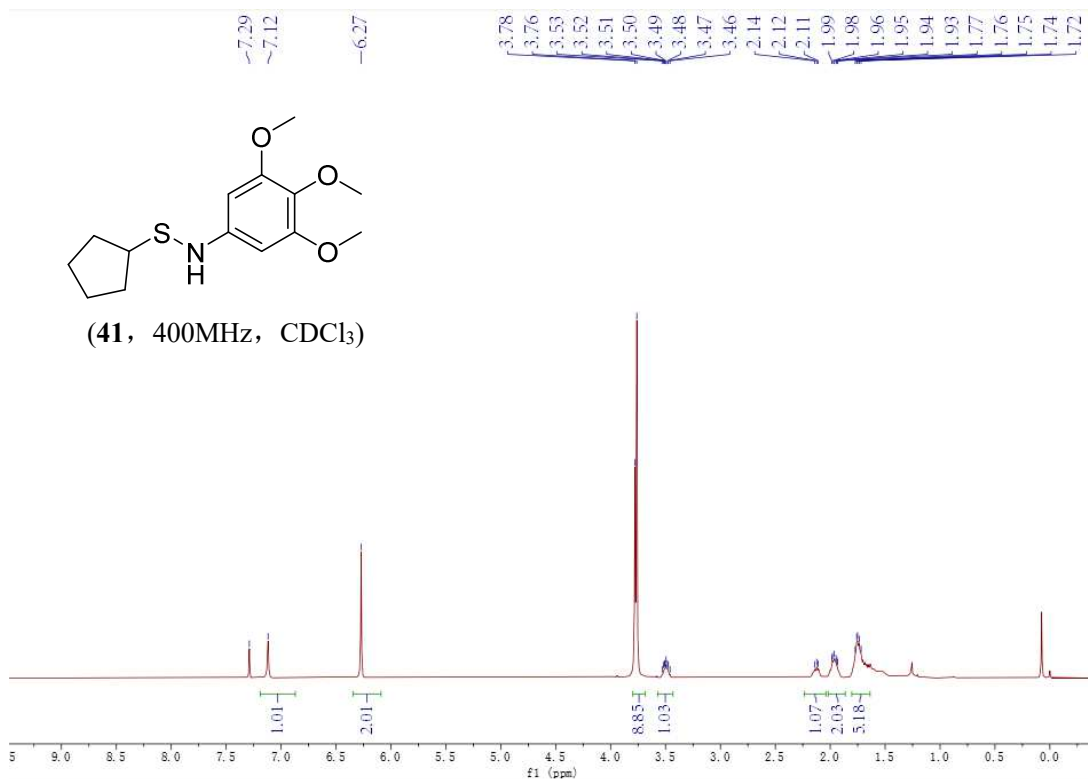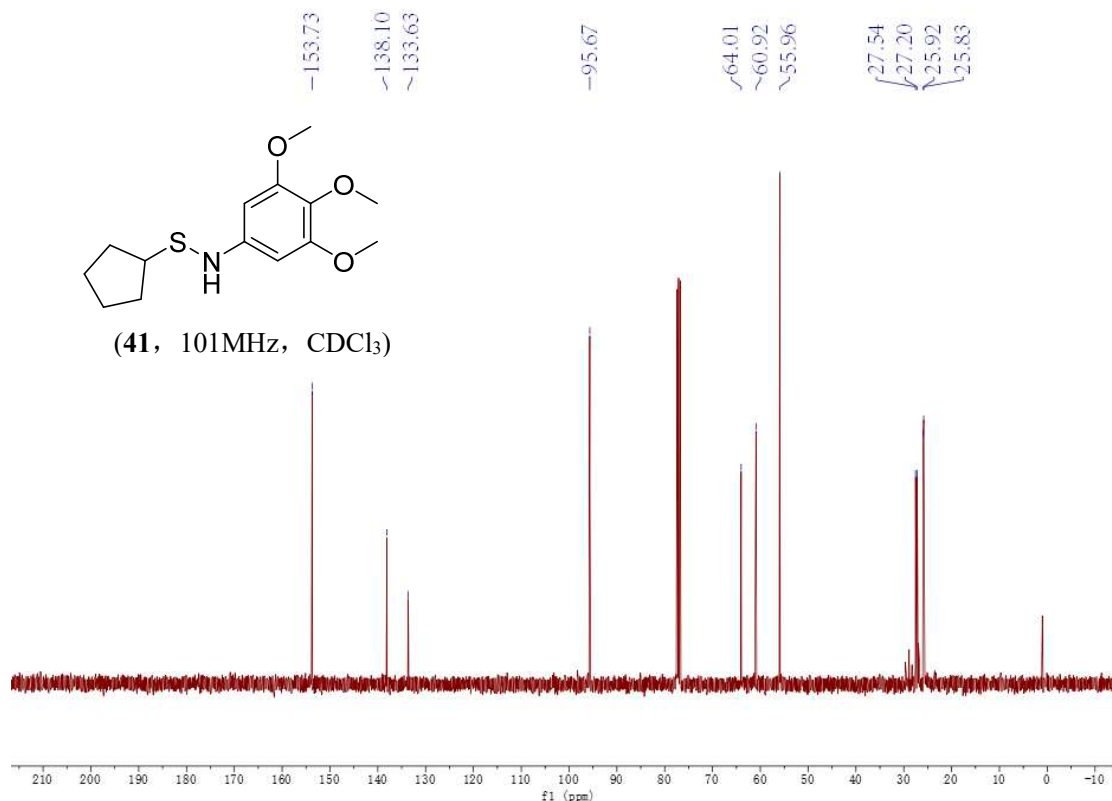

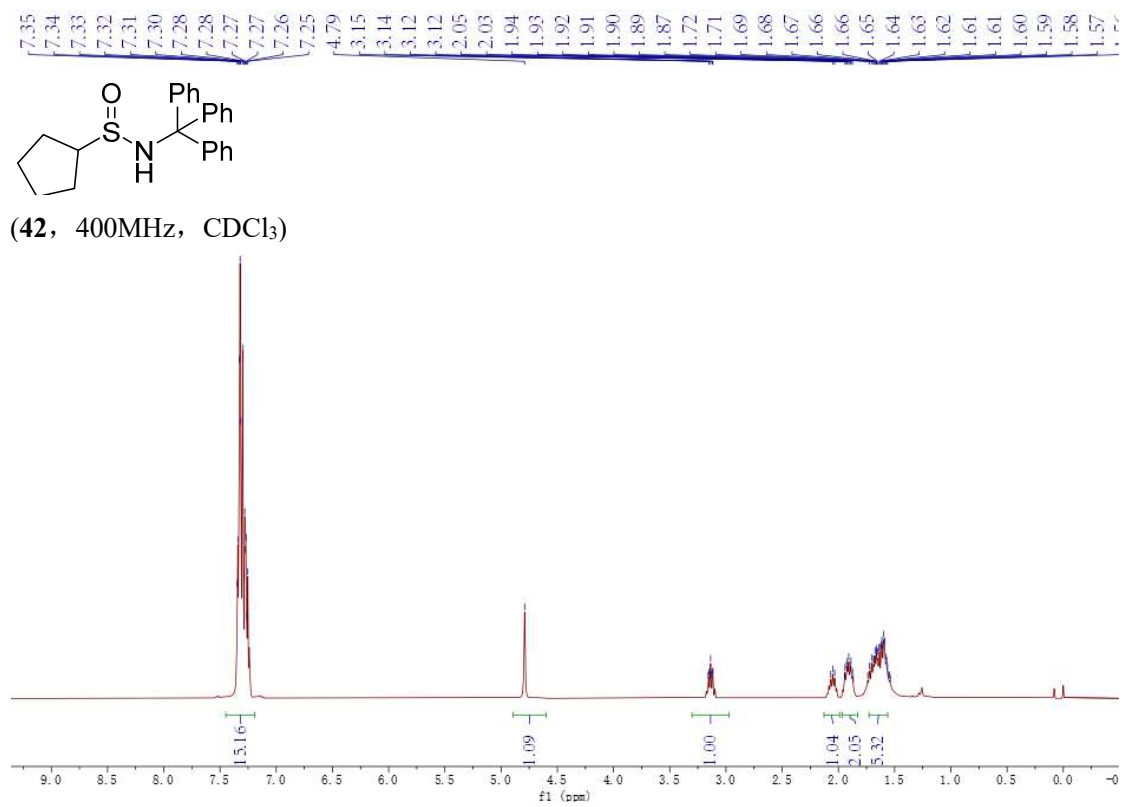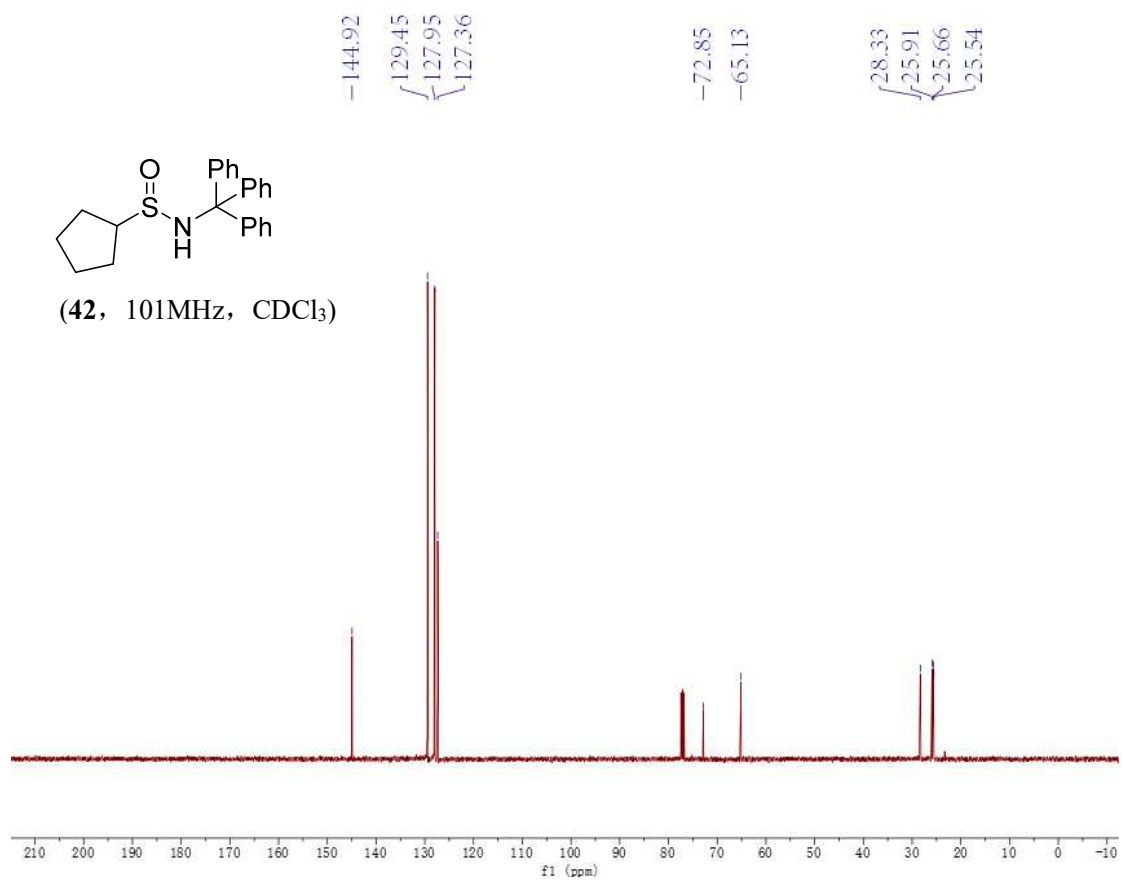

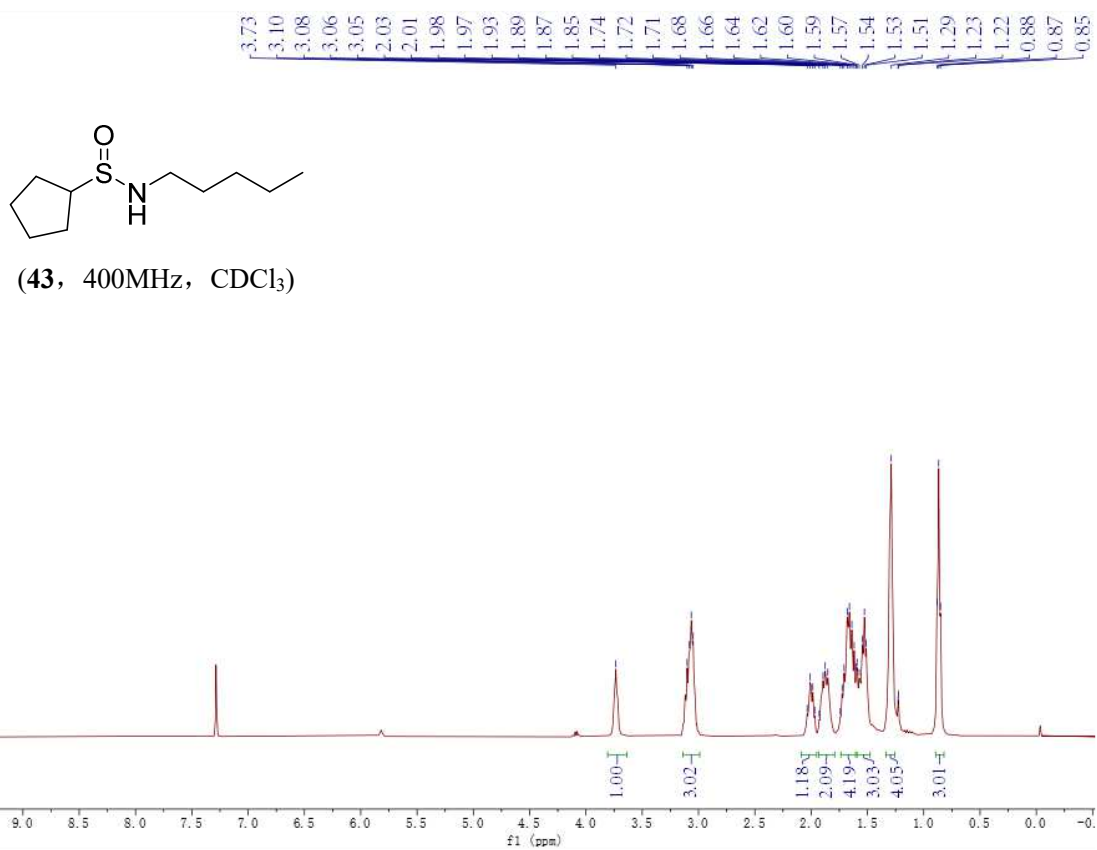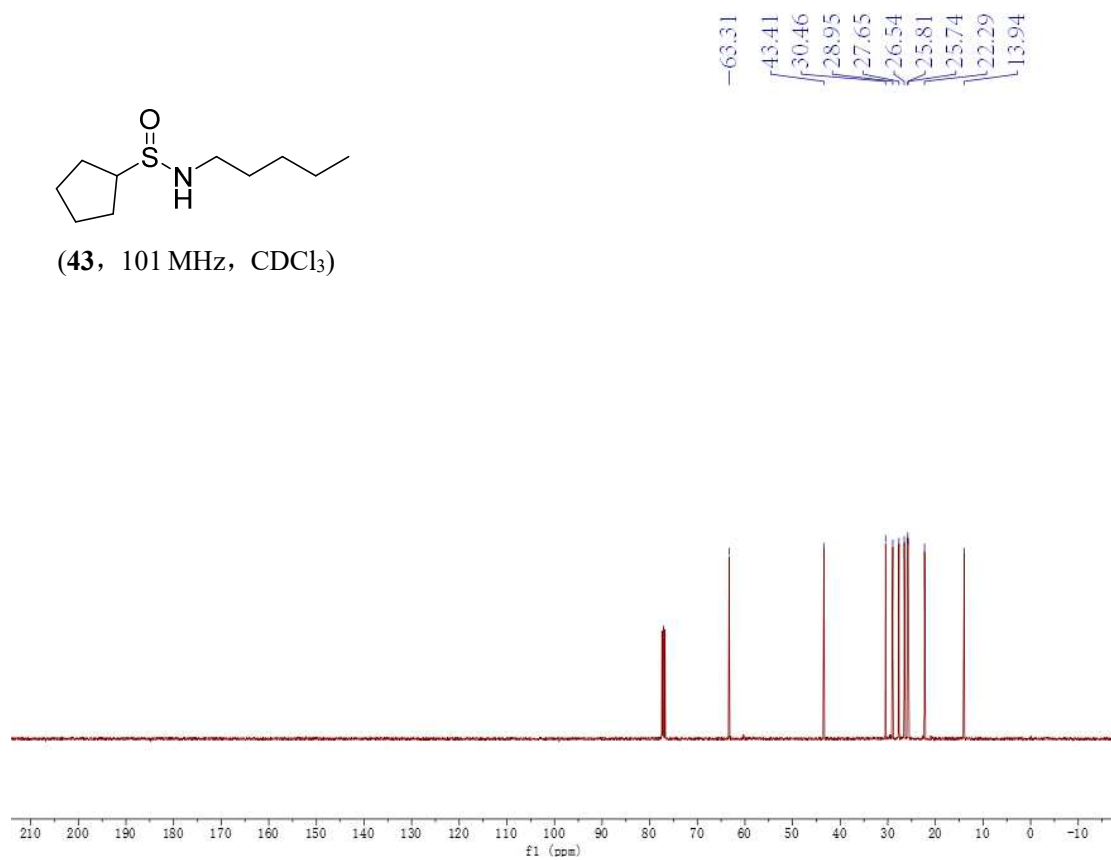

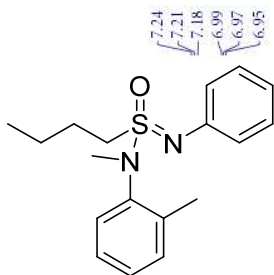

(44, 400MHz, CDCl<sub>3</sub>)

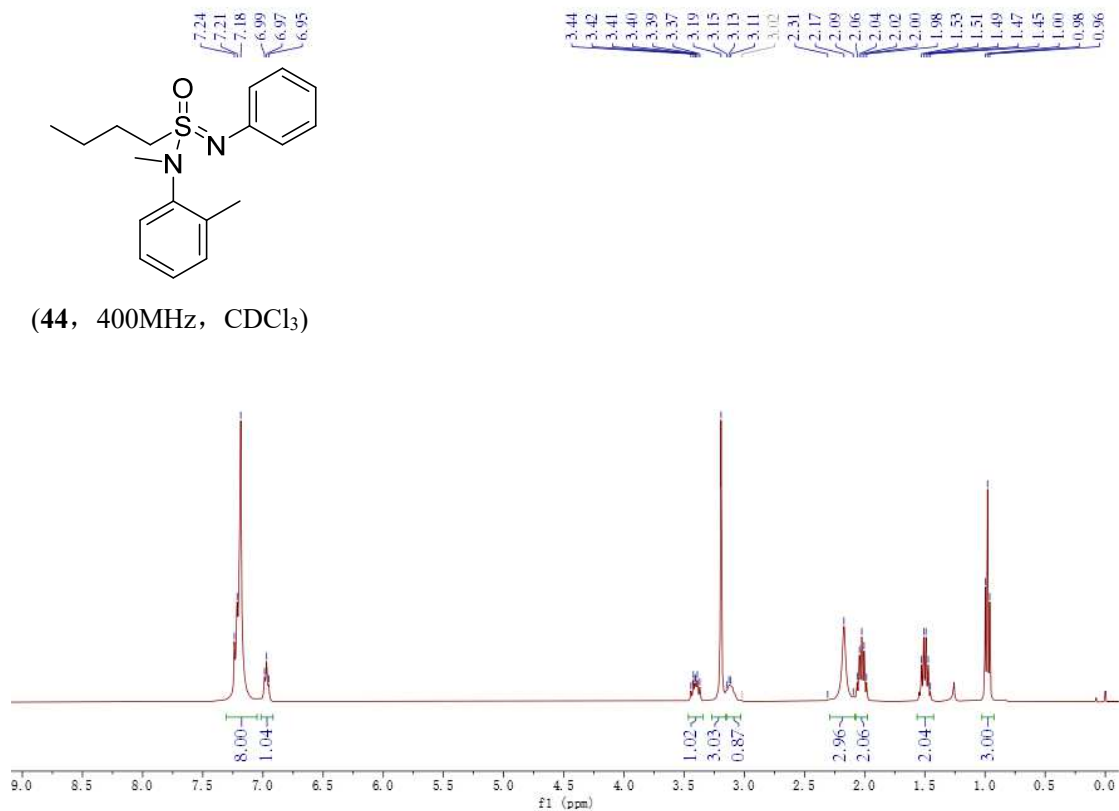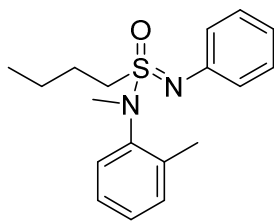

(44, 101MHz, CDCl<sub>3</sub>)

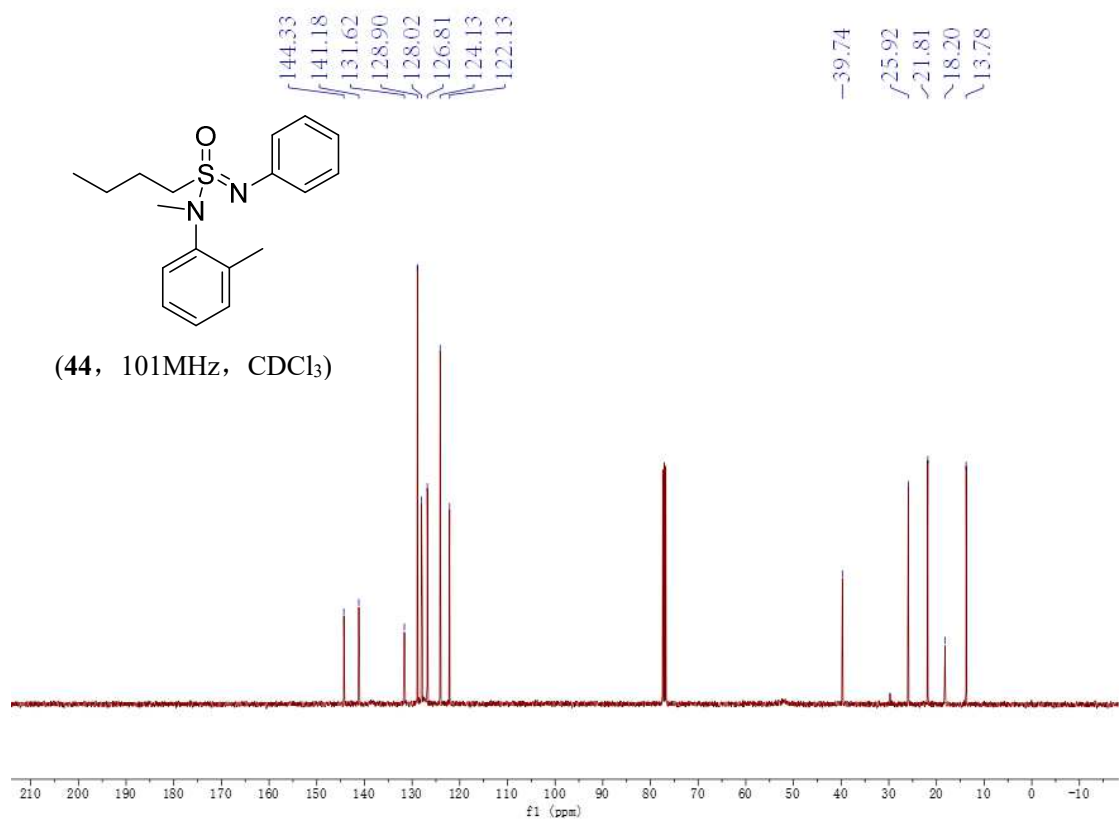

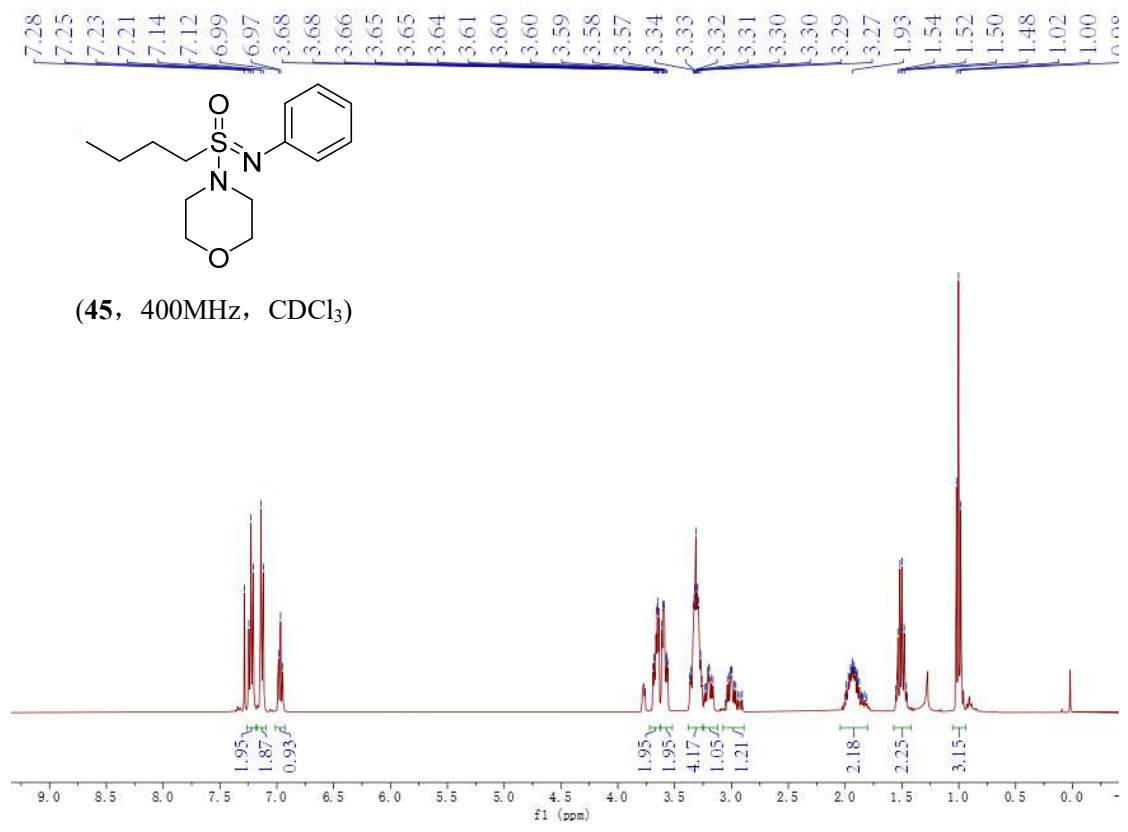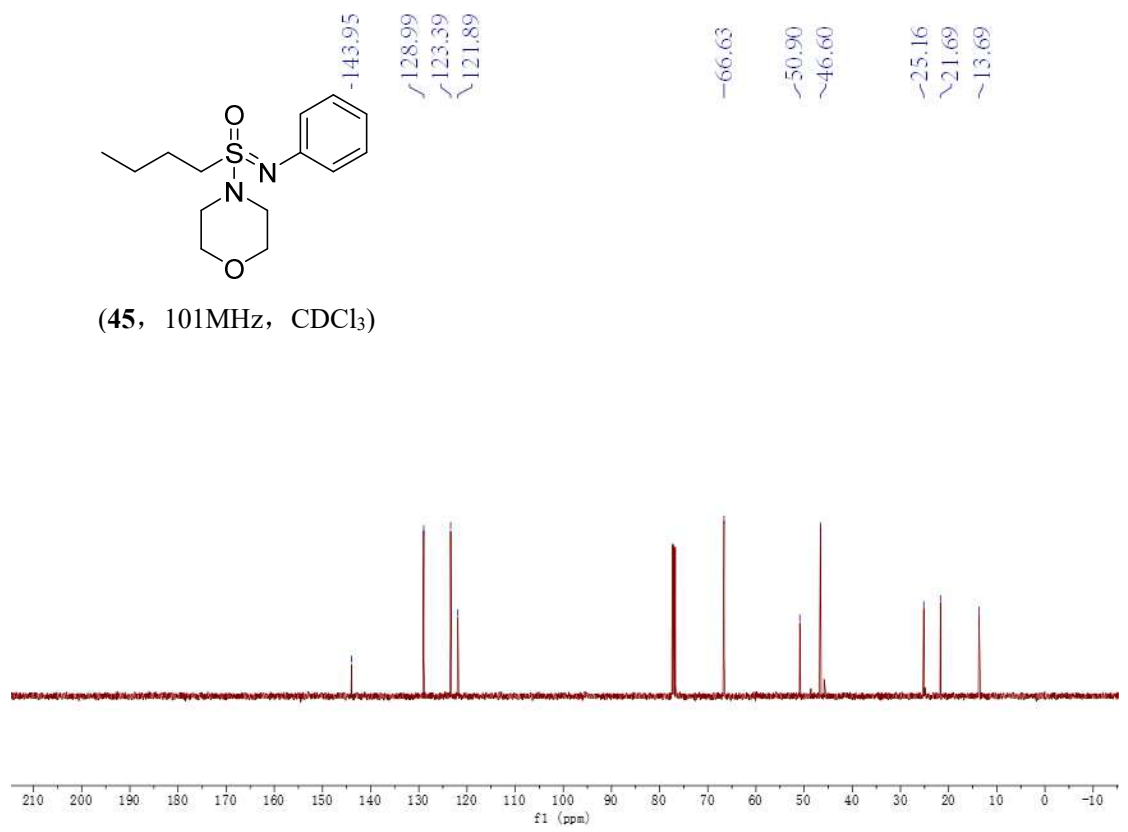

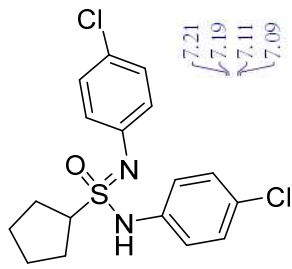

(46, 400MHz, CDCl<sub>3</sub>)

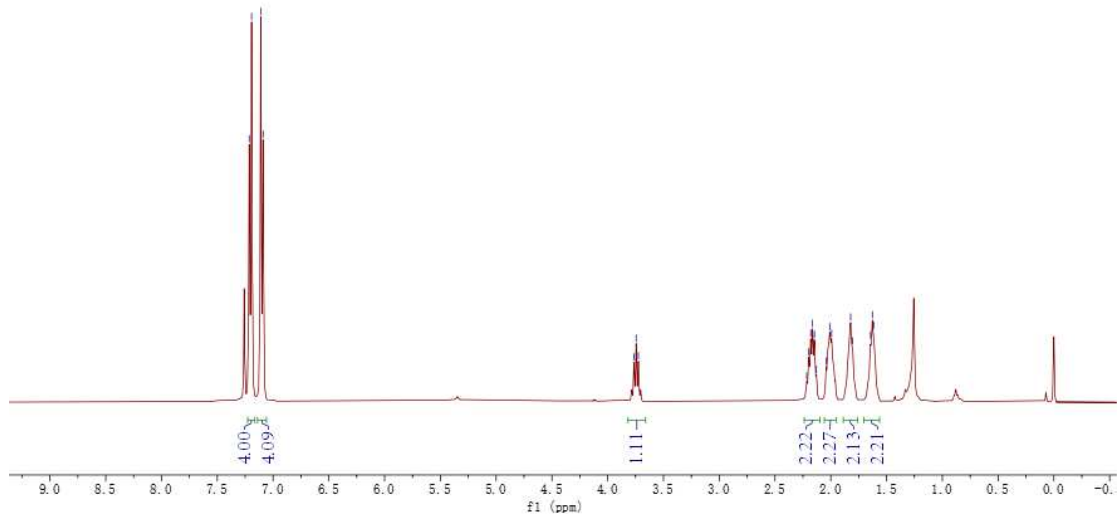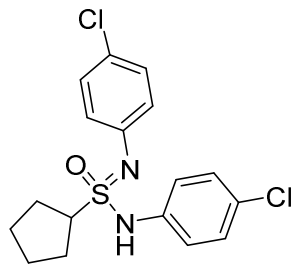

(46, 101MHz, CDCl<sub>3</sub>)

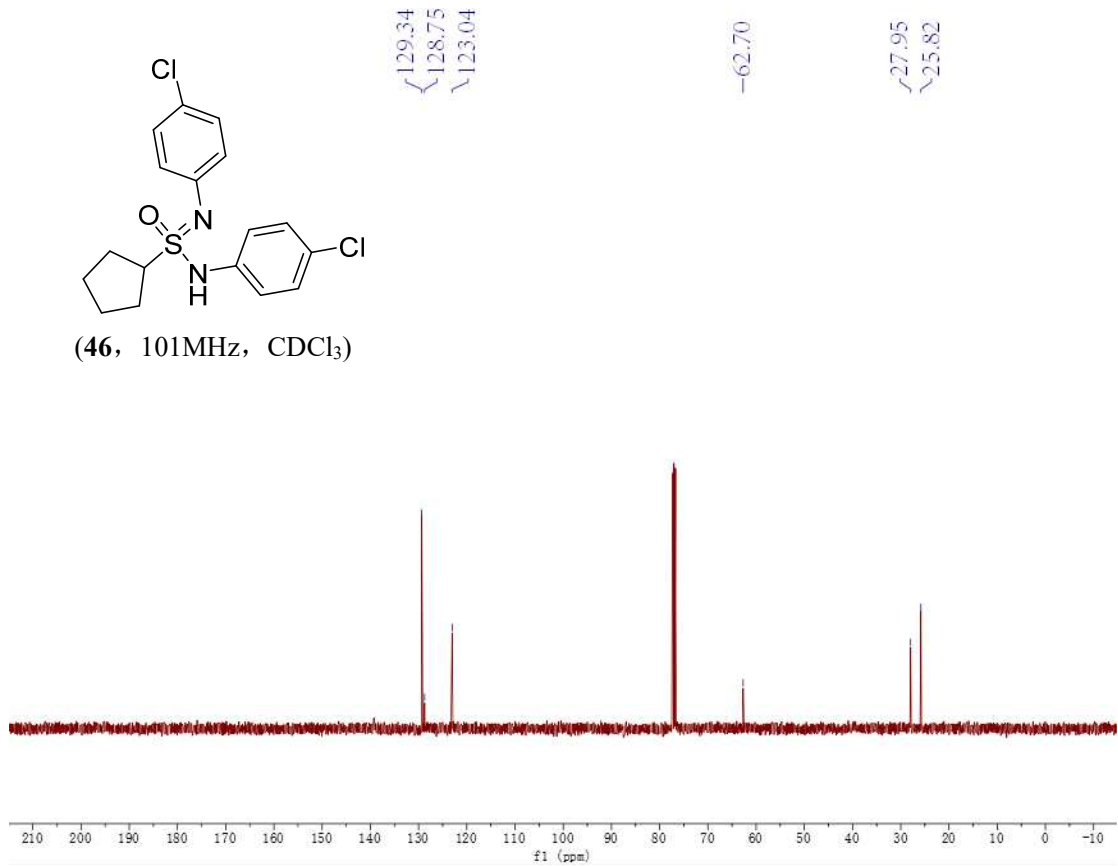

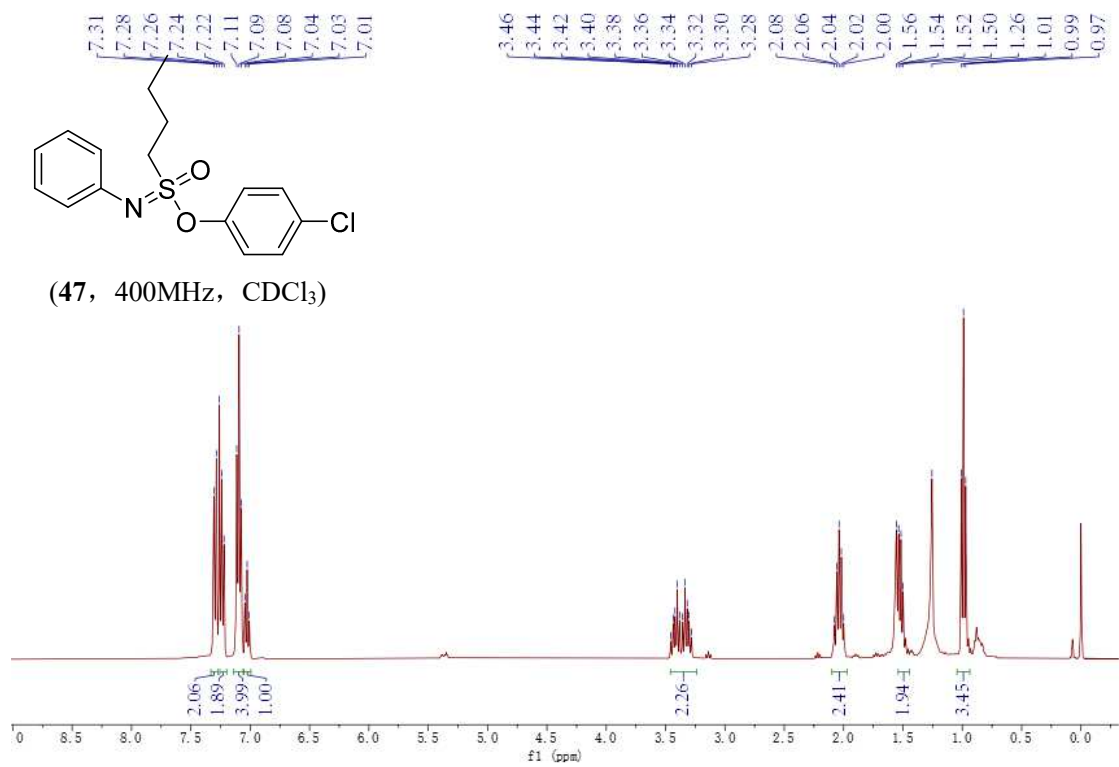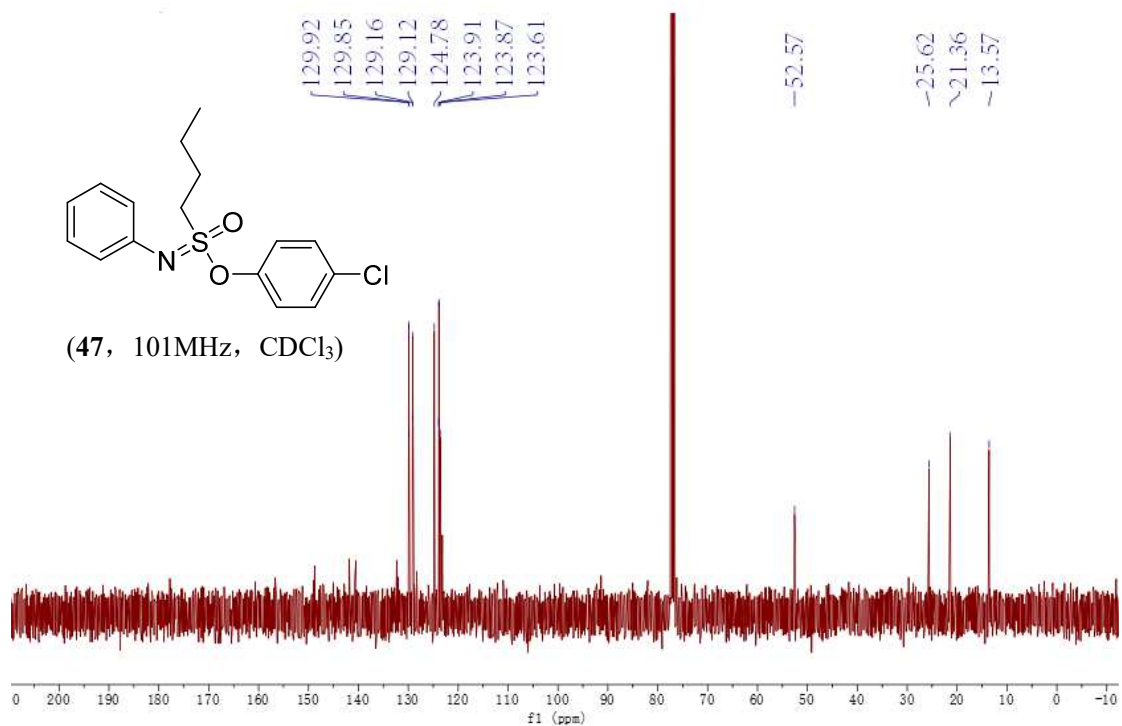

7.81  
7.79  
7.54  
7.52  
7.50  
7.45  
7.43  
7.41  
7.26  
7.24  
7.22  
7.21  
7.15  
7.12  
7.10  
7.08

-1.26

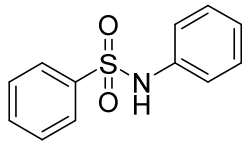

(48, 400MHz, CDCl<sub>3</sub>)

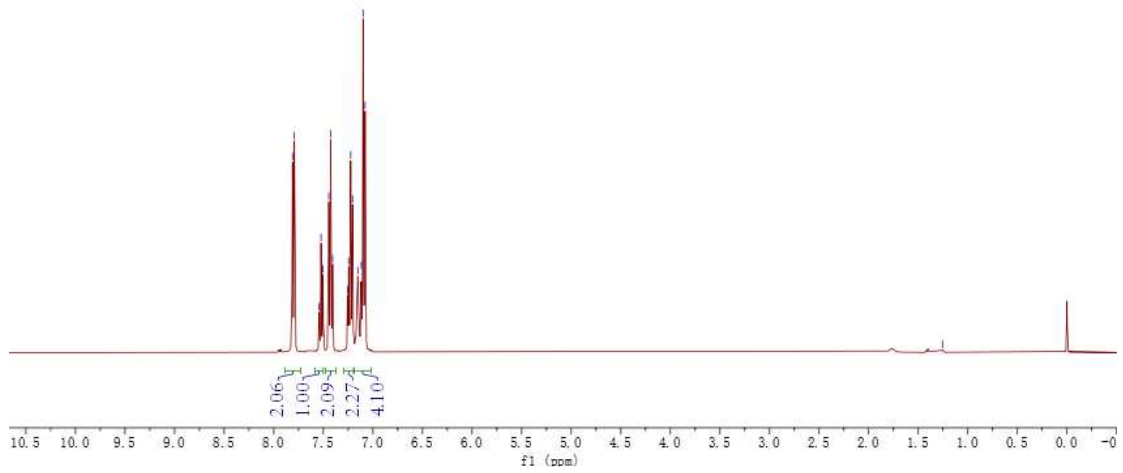

138.97  
136.41  
133.05  
129.35  
129.06  
127.26  
125.46  
121.70

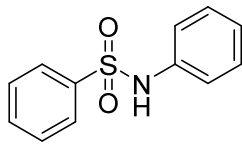

(48, 101MHz, CDCl<sub>3</sub>)

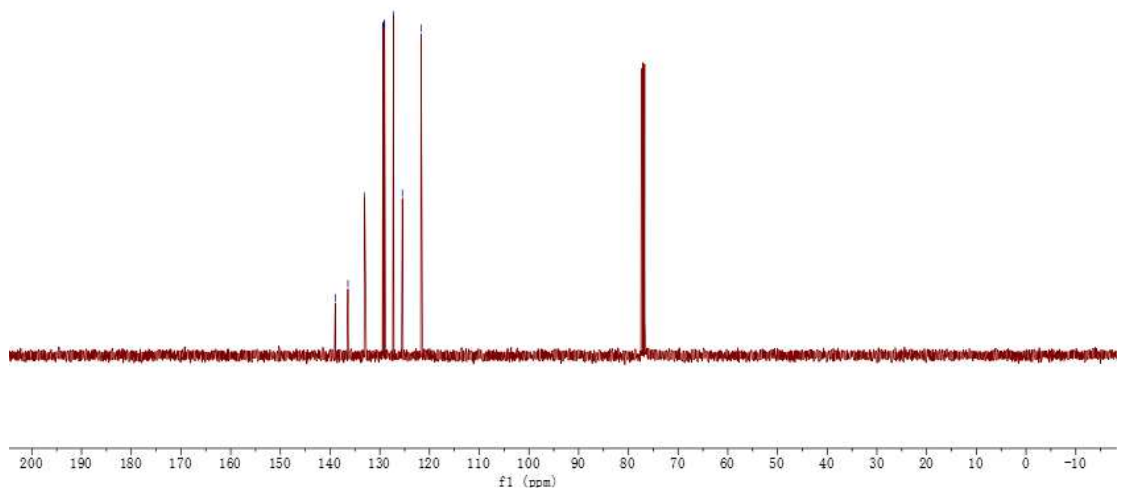

Supplement: d3ob01782f1.pdf [file d3ob01782f1.pdf]
